# Supplementary material for: A Comparative Pan-Genome Perspective of Niche-Adaptable Cell-Surface Protein Phenotypes in Lactobacillus rhamnosus
Source: PLoS One. 2014 Jul 17;9(7):e102762. doi: 10.1371/journal.pone.0102762 (PMC4102537; doi:10.1371/journal.pone.0102762)
Supplement: Table S1 — Predicted core and dispensable genes of the L. rhamnosus pan-genome. Listed are the predicted loci from the 13 genomes that make up the core (2095) and dispensable (2798) parts of the L. rhamnosus pan-genome (4893). Locus tags of genes (with specified annotations) that belong to the core (yellow highlight) and dispensable genomes are listed. Locus tags for the 75 core genes (per each L. rhamnosus genome) that are not found in any other Lactobacillus species are indentified by red font. Locus tags for the unique (blue font) and ORFan-like (grey highlight) genes in the dispensable genome are indicated. (XLSX) [file pone.0102762.s003.xlsx]

## Sheet: Sheet1
Table S1. Predicted core and dispensable genes of the L. rhamnosus pan-genome.
Lactobacillus rhamnosus GG		Lactobacillus rhamnosus ATCC 21052		Lactobacillus rhamnosus ATCC 8530		Lactobacillus rhamnosus ATCC 53103		Lactobacillus rhamnosus E800		Lactobacillus rhamnosus HN001		Lactobacillus rhamnosus LMS2-1		Lactobacillus rhamnosus LRHMDP2		Lactobacillus rhamnosus LRHMDP3		Lactobacillus rhamnosus LC705		Lactobacillus rhamnosus PEL5		Lactobacillus rhamnosus PEL6		Lactobacillus rhamnosus R0011
Locus tag	Gene annotation	Locus tag	Gene annotation	Locus tag	Gene annotation	Locus tag	Gene annotation	Locus tag	Gene annotation	Locus tag	Gene annotation	Locus tag	Gene annotation	Locus tag	Gene annotation	Locus tag	Gene annotation	Locus tag	Gene annotation	Locus tag	Gene annotation	Locus tag	Gene annotation	Locus tag	Gene annotation
LGG_00001	chromosomal replication initiation protein	HMPREF0541_00187	replication initiator protein DnaA	LRHK_1	chromosomal replication initiator protein DnaA	LRHM_0001	chromosomal replication initiator protein DnaA	E800_1187	Chromosomal replication initiator protein DnaA	LRH_10170	DNA replication ATPase initiation	HMPREF0539_0360	DNA-directed DNA replication initiator protein	LRHMDP2_2277	Chromosomal replication initiator protein DnaA	LRHMDP3_177	Chromosomal replication initiator protein DnaA	LC705_00001	chromosomal replication initiation protein	PEL5_1581	Chromosomal replication initiator protein DnaA	PEL6_993	Chromosomal replication initiator protein DnaA	R0011_06577	chromosomal replication initiation protein
LGG_00002	DNA polymerase III beta subunit	HMPREF0541_00188	DNA polymerase III, beta subunit	LRHK_2	DNA polymerase III subunit beta	LRHM_0002	DNA-directed DNA polymerase III subunit beta	E800_1186	DNA polymerase III beta subunit	LRH_10165	DNA polymerase sliding clamp subunit	HMPREF0539_0359	DNA-directed DNA polymerase	LRHMDP2_2278	DNA polymerase III beta subunit	LRHMDP3_178	DNA polymerase III beta subunit	LC705_00002	DNA polymerase III subunit beta	PEL5_1580	DNA polymerase III beta subunit	PEL6_992	DNA polymerase III beta subunit	R0011_06582	DNA polymerase III subunit beta
LGG_00003	S4 domain-containing protein YaaA	HMPREF0541_00190	S4 domain protein YaaA	LRHK_4	S4 domain-containing protein YaaA	LRHM_0003	hypothetical protein	E800_1184	FIG002958: hypothetical protein	LRH_10155	S4-like RNA binding protein	HMPREF0539_0357	S4 family RNA binding protein	LRHMDP2_2280	FIG002958: hypothetical protein	LRHMDP3_180	FIG002958: hypothetical protein	LC705_00004	s4 domain-containing protein YaaA	PEL5_1578	FIG002958: hypothetical protein	PEL6_990	FIG002958: hypothetical protein	R0011_06592	s4 domain-containing protein YaaA
LGG_00004	DNA replication and repair protein recF	HMPREF0541_00191	DNA replication and repair protein RecF	LRHK_5	DNA replication and repair RecF family protein	LRHM_0004	recombination protein RecF	E800_1183	DNA recombination and repair protein RecF	LRH_10150	Recombinational DNA repair ATPase (RecF pathway)	HMPREF0539_0356	recombination protein F	LRHMDP2_2281	DNA recombination and repair protein RecF	LRHMDP3_181	DNA recombination and repair protein RecF	LC705_00005	DNA replication and repair protein recF	PEL5_1577	DNA recombination and repair protein RecF	PEL6_989	DNA recombination and repair protein RecF	R0011_06597	DNA replication and repair protein recF
LGG_00005	DNA gyrase subunit B	HMPREF0541_00192	DNA gyrase, B subunit	LRHK_6	DNA gyrase subunit B	LRHM_0005	DNA gyrase B subunit	E800_1182	DNA gyrase subunit B	LRH_10145	DNA gyrase, B subunit	HMPREF0539_0355	DNA topoisomerase (ATP-hydrolyzing)	LRHMDP2_2282	DNA gyrase subunit B	LRHMDP3_182	DNA gyrase subunit B	LC705_00006	DNA gyrase subunit B	PEL5_1576	DNA gyrase subunit B	PEL6_988	DNA gyrase subunit B	R0011_06602	DNA gyrase subunit B
LGG_00006	DNA gyrase subunit A	HMPREF0541_00193	DNA gyrase, A subunit	LRHK_7	DNA gyrase subunit A	LRHM_0006	DNA gyrase subunit A	E800_1181	DNA gyrase subunit A	LRH_10140	DNA gyrase, A subunit	HMPREF0539_0354	DNA topoisomerase (ATP-hydrolyzing)	LRHMDP2_2283	DNA gyrase subunit A	LRHMDP3_183	DNA gyrase subunit A	LC705_00007	DNA gyrase subunit A	PEL5_1575	DNA gyrase subunit A	PEL6_987	DNA gyrase subunit A	R0011_06607	DNA gyrase subunit A
LGG_00007	hypothetical protein			LRHK_8	hypothetical protein			E800_1180	Single-stranded DNA-binding protein	LRH_10135	hypothetical protein	HMPREF0539_0353	conserved hypothetical protein	LRHMDP2_2284	Single-stranded DNA-binding protein	LRHMDP3_184	Single-stranded DNA-binding protein	LC705_00008	hypothetical protein	PEL5_1574	Single-stranded DNA-binding protein	PEL6_986	Single-stranded DNA-binding protein
LGG_00008	hypothetical protein			LRHK_9	hypothetical protein	LRHM_0007	hypothetical protein	E800_1179	hypothetical protein	LRH_10125	hypothetical protein	HMPREF0539_0351	conserved hypothetical protein	LRHMDP2_2285	hypothetical protein	LRHMDP3_185	hypothetical protein	LC705_00009	hypothetical protein	PEL5_1573	hypothetical protein	PEL6_985	hypothetical protein
LGG_00009	hypothetical protein			LRHK_10	pediocin PapC-like protein	LRHM_0008	hypothetical protein	E800_1178	hypothetical protein	LRH_10120	hypothetical protein	HMPREF0539_0350	conserved hypothetical protein					LC705_00010	pediocin PapC-like protein
LGG_00010	single-stranded DNA-binding protein	HMPREF0541_00195	single-strand binding family protein	LRHK_11	single-stranded DNA-binding family protein	LRHM_0009	single-stranded DNA-binding protein	E800_1177	Single-stranded DNA-binding protein	LRH_10110	Single-stranded DNA-binding protein	HMPREF0539_0349	single-stranded DNA-binding protein	LRHMDP2_2286	Single-stranded DNA-binding protein	LRHMDP3_186	Single-stranded DNA-binding protein	LC705_00011	single-stranded DNA-binding protein	PEL5_1572	Single-stranded DNA-binding protein	PEL6_984	Single-stranded DNA-binding protein	R0011_06617	single-stranded DNA-binding protein
LGG_00011	30S ribosomal protein S6	HMPREF0541_00196	ribosomal protein S6	LRHK_12	30S ribosomal protein S6	LRHM_0010	30S ribosomal protein S6	E800_1176	SSU ribosomal protein S6p	LRH_10105	Ribosomal protein S6	HMPREF0539_0348	ribosomal protein S6	LRHMDP2_2287	SSU ribosomal protein S6p	LRHMDP3_187	SSU ribosomal protein S6p	LC705_00012	30S ribosomal protein S6	PEL5_1571	SSU ribosomal protein S6p	PEL6_983	SSU ribosomal protein S6p	R0011_06622	30S ribosomal protein S6
LGG_00012	single-stranded DNA-binding protein	HMPREF0541_00197	single-strand binding family protein	LRHK_13	single-stranded DNA-binding family protein	LRHM_0011	single-stranded DNA-binding protein	E800_1175	Single-stranded DNA-binding protein	LRH_10100	Single-stranded DNA-binding protein	HMPREF0539_0347	single-strand DNA binding protein	LRHMDP2_2288	Single-stranded DNA-binding protein	LRHMDP3_188	Single-stranded DNA-binding protein	LC705_00013	single-stranded DNA-binding protein	PEL5_1570	Single-stranded DNA-binding protein	PEL6_982	Single-stranded DNA-binding protein	R0011_06627	single-stranded DNA-binding protein
LGG_00013	30S ribosomal protein S18	HMPREF0541_00198	ribosomal protein S18	LRHK_14	30S ribosomal protein S18	LRHM_0012	30S ribosomal protein S18	E800_1174	SSU ribosomal protein S18p @ SSU ribosomal protein S18p, zinc-independent	LRH_10095	Ribosomal protein S18	HMPREF0539_0346	ribosomal protein S18	LRHMDP2_2289	SSU ribosomal protein S18p @ SSU ribosomal protein S18p, zinc-independent	LRHMDP3_189	SSU ribosomal protein S18p @ SSU ribosomal protein S18p, zinc-independent	LC705_00014	30S ribosomal protein S18	PEL5_1569	SSU ribosomal protein S18p @ SSU ribosomal protein S18p, zinc-independent	PEL6_981	SSU ribosomal protein S18p @ SSU ribosomal protein S18p, zinc-independent	R0011_06632	30S ribosomal protein S18
LGG_00014	hypothetical protein					LRHM_0013	hypothetical protein	E800_594	Malolactic regulator															R0011_04807	hypothetical protein
LGG_00015	intracellular protease PfpI family	HMPREF0541_00199	general stress protein 18	LRHK_15	general stress protein 18	LRHM_0014	hypothetical protein	E800_1172	ThiJ/PfpI family protein	LRH_10090	4-methyl-5(B-hydroxyethyl)-thiazole monophosphate biosynthesis enzyme, amidase family protein	HMPREF0539_0345	C56 family peptidase	LRHMDP2_2291	ThiJ/PfpI family protein	LRHMDP3_191	ThiJ/PfpI family protein	LC705_00015	intracellular protease PfpI family	PEL5_1567	ThiJ/PfpI family protein	PEL6_979	ThiJ/PfpI family protein	R0011_06637	intracellular protease PfpI family protein
LGG_00016	cytochrome d ubiquinol oxidase subunit I	HMPREF0541_00200	putative cytochrome d ubiquinol oxidase, subunit I	LRHK_17	bacterial Cytochrome Ubiquinol Oxidase family protein	LRHM_0015	cytochrome D ubiquinol oxidase subunit I	E800_1170	Cytochrome d ubiquinol oxidase subunit I	LRH_10085	Cytochrome bd-type quinol oxidase, fusion of subunit 1 and subunit 2	HMPREF0539_0344	cytochrome d ubiquinol oxidase, subunit I	LRHMDP2_2292	Cytochrome d ubiquinol oxidase subunit I	LRHMDP3_192	Cytochrome d ubiquinol oxidase subunit I	LC705_00016	cytochrome d ubiquinol oxidase subunit I	PEL5_1565	Cytochrome d ubiquinol oxidase subunit I	PEL6_978	Cytochrome d ubiquinol oxidase subunit I	R0011_06642	cytochrome d ubiquinol oxidase subunit I
LGG_00017	cytochrome d ubiquinol oxidase subunit II	HMPREF0541_00201	cytochrome d ubiquinol oxidase, subunit II	LRHK_18	cytochrome d ubiquinol oxidase, subunit II	LRHM_0016	cytochrome D ubiquinol oxidase subunit II			LRH_10080	Cytochrome bd-type quinol oxidase, fusion of subunit 1 and subunit 2	HMPREF0539_0343	cytochrome d ubiquinol oxidase, subunit II					LC705_00017	cytochrome d ubiquinol oxidase subunit II					R0011_06647	cytochrome d ubiquinol oxidase subunit II
LGG_00018	hypothetical protein	HMPREF0541_00202	hypothetical protein	LRHK_19	hypothetical protein	LRHM_0017	hypothetical protein	E800_1169	FIG00743550: hypothetical protein	LRH_10075	hypothetical protein	HMPREF0539_0342	conserved hypothetical protein	LRHMDP2_2293	FIG00743550: hypothetical protein	LRHMDP3_193	FIG00743550: hypothetical protein	LC705_00018	hypothetical protein	PEL5_1564	FIG00743550: hypothetical protein	PEL6_977	FIG00743550: hypothetical protein	R0011_06652	hypothetical protein
LGG_00019	hypothetical protein	HMPREF0541_00203	hypothetical protein	LRHK_20	putative metal-dependent membrane protease					LRH_10070	Predicted metal-dependent membrane protease	HMPREF0539_0341	possible metal-dependent membrane protease	LRHMDP2_2294	CAAX amino terminal protease family	LRHMDP3_194	CAAX amino terminal protease family	LC705_00019	hypothetical protein					R0011_06657	hypothetical protein
LGG_00020	transposase IS30 family protein					LRHM_0019	transposase					HMPREF0539_3134	IS30 family transposase							PEL5_2855	Mobile element protein	PEL6_2177	Mobile element protein
LGG_00021	abortive infection protein	HMPREF0541_00206	CAAX amino terminal protease family protein	LRHK_23	CAAX amino terminal protease self- immunity family protein	LRHM_0021	hypothetical protein	E800_1898	membrane-bound protease, CAAX family	LRH_04839	Abortive infection protein	HMPREF0539_0337	CAAX family protease	LRHMDP2_2297	membrane-bound protease, CAAX family	LRHMDP3_197	membrane-bound protease, CAAX family	LC705_00020	abortive infection protein	PEL5_869	membrane-bound protease, CAAX family	PEL6_2176	membrane-bound protease, CAAX family	R0011_06667	abortive infection protein
LGG_00022	transposase IS5 family protein					LRHM_0023	putative transposase			LRH_05174	hypothetical protein
LGG_00023	metal-dependent membrane protease	HMPREF0541_00207	CAAX amino terminal protease family protein			LRHM_0024	hypothetical protein							LRHMDP2_2298	CAAX amino terminal protease family	LRHMDP3_198	CAAX amino terminal protease family			PEL5_1858	CAAX amino terminal protease family	PEL6_203	CAAX amino terminal protease family	R0011_06672	metal-dependent membrane protease
LGG_00024	hypothetical protein					LRHM_0025	hypothetical protein	E800_1412	hypothetical protein
LGG_00025	ABC transporter permease	HMPREF0541_00208	ABC-2 type transporter	LRHK_24	ABC transporter	LRHM_0026	hypothetical protein	E800_1411	ABC-2 type transporter	LRH_09885	ABC-2 type transporter	HMPREF0539_0336	ABC-2 type transporter	LRHMDP2_2299	ABC-2 type transporter	LRHMDP3_199	ABC-2 type transporter	LC705_00021	ABC transporter permease	PEL5_1860	ABC-2 type transporter			R0011_06677	ABC transporter permease
LGG_00026	transposase IS5 family protein					LRHM_0027	putative transposase	E800_1325	Mobile element protein											PEL5_2242	Mobile element protein	PEL6_2079	Mobile element protein
LGG_00027	hypothetical protein					LRHM_0028	hypothetical protein
LGG_00028	ABC transporter ATP-binding protein	HMPREF0541_00209	ABC transporter, ATP-binding protein	LRHK_25	ABC transporter family protein	LRHM_0029	putative multidrug ABC transporter ATP-binding component	E800_1410	FIG00751668: hypothetical protein	LRH_09880	ABC-type transport system, ATP-binding protein	HMPREF0539_0335	ABC superfamily ATP binding cassette transporter, ABC protein	LRHMDP2_2300	FIG00751668: hypothetical protein	LRHMDP3_200	FIG00751668: hypothetical protein	LC705_00022	ABC transporter ATPase	PEL5_2426	FIG00751668: hypothetical protein	PEL6_975	FIG00751668: hypothetical protein	R0011_06682	ABC transporter ATPase
LGG_00029	ammonium transporter family protein	HMPREF0541_00211	ammonium transporter	LRHK_26	ammonium Transporter family protein	LRHM_0030	ammonium transporter protein	E800_1409	ammonium transporter family protein	LRH_09313	ammonium transporter family protein	HMPREF0539_0334	ammonium transporter family protein	LRHMDP2_2301	ammonium transporter family protein	LRHMDP3_201	ammonium transporter family protein	LC705_00023	ammonium transporter family protein	PEL5_2425	ammonium transporter family protein	PEL6_974	ammonium transporter family protein	R0011_06687	ammonium transporter family protein
LGG_00030	monooxygenase	HMPREF0541_00212	pyridine nucleotide-disulfide oxidoreductase family protein	LRHK_27	glucose inhibited division A family protein	LRHM_0031	hypothetical protein	E800_1408	probable monooxygenase	LRH_09308	hypothetical protein	HMPREF0539_0333	probable monooxygenase	LRHMDP2_2302	probable monooxygenase	LRHMDP3_202	probable monooxygenase	LC705_00024	monooxygenase	PEL5_2424	probable monooxygenase	PEL6_973	probable monooxygenase	R0011_06692	monooxygenase
LGG_00031	surface antigen	HMPREF0541_00213	CHAP domain protein	LRHK_28	CHAP domain protein	LRHM_0032	hypothetical protein	E800_1407	FIG00743123: hypothetical protein	LRH_09303	Surface antigen	HMPREF0539_0332	surface antigen	LRHMDP2_2303	FIG00743123: hypothetical protein	LRHMDP3_203	FIG00743123: hypothetical protein	LC705_00025	surface antigen	PEL5_2423	FIG00743123: hypothetical protein	PEL6_972	FIG00743123: hypothetical protein	R0011_06697	surface antigen
LGG_00032	antimicrobial peptide ABC transporter permease	HMPREF0541_00215	efflux ABC transporter, permease protein	LRHK_30	ftsX-like permease family protein	LRHM_0033	antimicrobial peptide ABC transporter permease component	E800_1405	ABC transporter, permease protein	LRH_09293	ABC-type antimicrobial peptide transport system, permease component	HMPREF0539_0330	ABC superfamily ATP binding cassette transporter, membrane protein	LRHMDP2_2305	ABC transporter, permease protein	LRHMDP3_205	ABC transporter, permease protein	LC705_00026	antimicrobial peptide ABC transporter permease	PEL5_2421	ABC transporter, permease protein	PEL6_970	ABC transporter, permease protein	R0011_06707	antimicrobial peptide ABC transporter permease
LGG_00033	ABC transporter ATP-binding protein	HMPREF0541_00216	ABC transporter, ATP-binding protein	LRHK_31	ABC transporter family protein	LRHM_0034	antimicrobial peptide ABC transporter ATP-binding component	E800_1404	ABC transporter, ATP-binding protein	LRH_09288	ABC-type antimicrobial peptide transport system, ATPase component	HMPREF0539_0329	ABC superfamily ATP binding cassette transporter, ABC protein	LRHMDP2_2306	ABC-type antimicrobial peptide transport system, ATPase component	LRHMDP3_206	ABC-type antimicrobial peptide transport system, ATPase component	LC705_00027	ABC transporter ATPase	PEL5_2420	ABC transporter, ATP-binding protein	PEL6_969	ABC transporter, ATP-binding protein	R0011_06712	ABC transporter ATPase
LGG_00034	TetR family transcriptional regulator	HMPREF0541_00217	transcriptional regulator, TetR family	LRHK_32	bacterial regulatory s, tetR family protein	LRHM_0035	transcriptional regulator	E800_1403	Transcriptional regulator	LRH_09283	Transcriptional regulator	HMPREF0539_0328	transcriptional regulator	LRHMDP2_2307	Transcriptional regulator	LRHMDP3_207	Transcriptional regulator	LC705_00028	TetR family transcriptional regulator	PEL5_2419	Transcriptional regulator	PEL6_968	Transcriptional regulator	R0011_06717	TetR family transcriptional regulator
LGG_00035	hydrolase	HMPREF0541_00218	Cof-like hydrolase	LRHK_33	HAD hydrolase	LRHM_0036	putative hydrolase	E800_1402	Predicted hydrolase of the HAD superfamily	LRH_09278	Predicted hydrolase of the HAD superfamily protein	HMPREF0539_0327	possible sugar-phosphatase	LRHMDP2_2308	Predicted hydrolase of the HAD superfamily	LRHMDP3_208	Predicted hydrolase of the HAD superfamily	LC705_00029	hydrolase	PEL5_2418	Predicted hydrolase of the HAD superfamily	PEL6_967	Predicted hydrolase of the HAD superfamily	R0011_06722	hydrolase
LGG_00036	hypothetical protein			LRHK_34	hypothetical protein	LRHM_0037	hypothetical protein	E800_1401	FIG00744246: hypothetical protein			HMPREF0539_0326	conserved hypothetical protein	LRHMDP2_2309	FIG00744246: hypothetical protein	LRHMDP3_209	FIG00744246: hypothetical protein	LC705_00030	hypothetical protein	PEL5_2417	FIG00744246: hypothetical protein	PEL6_966	FIG00744246: hypothetical protein
LGG_00037	permease	HMPREF0541_00219	hypothetical protein	LRHK_35	sulfite exporter TauE/SafE family protein	LRHM_0038	putative transporter protein	E800_1400	Predicted permease	LRH_09273	Predicted permease	HMPREF0539_0325	integral membrane protein	LRHMDP2_2310	Predicted permease	LRHMDP3_210	Predicted permease	LC705_00031	permease	PEL5_2416	Predicted permease	PEL6_965	Predicted permease	R0011_06727	permease
LGG_00038	integral membrane protein	HMPREF0541_00220	hypothetical protein	LRHK_36	hypothetical protein	LRHM_0039	hypothetical protein	E800_1399	Predicted integral membrane protein	LRH_09268	Predicted integral membrane protein	HMPREF0539_0324	protein of hypothetical function DUF1211	LRHMDP2_2311	Predicted integral membrane protein	LRHMDP3_211	Predicted integral membrane protein	LC705_00032	integral membrane protein	PEL5_2415	Predicted integral membrane protein	PEL6_964	Predicted integral membrane protein	R0011_06732	integral membrane protein
LGG_00039	maltose O-acetyltransferase	HMPREF0541_00221	putative maltose O-acetyltransferase	LRHK_37	galactoside O-acetyltransferase	LRHM_0040	putative galactoside O-acetyltransferase	E800_1398	Galactoside O-acetyltransferase	LRH_09263	galactoside O-acetyltransferase	HMPREF0539_0323	galactoside O-acetyltransferase	LRHMDP2_2312	Galactoside O-acetyltransferase	LRHMDP3_212	Galactoside O-acetyltransferase	LC705_00033	maltose O-acetyltransferase	PEL5_2414	Galactoside O-acetyltransferase	PEL6_963	Galactoside O-acetyltransferase	R0011_06737	maltose O-acetyltransferase
LGG_00040	hypothetical protein	HMPREF0541_00222	hypothetical protein	LRHK_38	hypothetical protein	LRHM_0041	hypothetical protein	E800_1397	FIG00746394: hypothetical protein	LRH_09258	hypothetical protein	HMPREF0539_0322	conserved hypothetical protein	LRHMDP2_2313	FIG00746394: hypothetical protein	LRHMDP3_213	FIG00746394: hypothetical protein	LC705_00034	hypothetical protein	PEL5_2413	FIG00746394: hypothetical protein	PEL6_962	FIG00746394: hypothetical protein	R0011_06742	hypothetical protein
LGG_00041	dipeptidase A	HMPREF0541_00224	dipeptidase	LRHK_39	dipeptidase	LRHM_0042	dipeptidase	E800_1396	Dipeptidase	LRH_09248	Dipeptidase	HMPREF0539_0321	dipeptidase	LRHMDP2_2314	Dipeptidase	LRHMDP3_214	Dipeptidase	LC705_00035	dipeptidase A	PEL5_2412	Dipeptidase	PEL6_961	Dipeptidase	R0011_06747	dipeptidase A
LGG_00042	membrane protein	HMPREF0541_00226	hypothetical protein	LRHK_40	hypothetical protein	LRHM_0043	hypothetical protein	E800_1395	Sugar specific permease	LRH_09243	Predicted membrane protein	HMPREF0539_0320	membrane protein	LRHMDP2_1665	Sugar specific permease	LRHMDP3_215	Sugar specific permease	LC705_00036	membrane protein	PEL5_2411	Sugar specific permease	PEL6_960	Sugar specific permease	R0011_06752	membrane protein
LGG_00043	hypothetical protein	HMPREF0541_00227	hypothetical protein	LRHK_41	hypothetical protein	LRHM_0044	hypothetical protein			LRH_09238	hypothetical protein	HMPREF0539_0319	conserved hypothetical protein					LC705_00037	hypothetical protein					R0011_06757	hypothetical protein
LGG_00044	hypothetical protein	HMPREF0541_00228	hypothetical protein	LRHK_42	hypothetical protein	LRHM_0045	hypothetical protein	E800_1394	hypothetical protein	LRH_09233	hypothetical protein	HMPREF0539_0318	conserved hypothetical protein	LRHMDP2_1289	hypothetical protein	LRHMDP3_216	hypothetical protein	LC705_00038	hypothetical protein	PEL5_2410	hypothetical protein	PEL6_959	hypothetical protein	R0011_06762	hypothetical protein
LGG_00045	hypothetical protein			LRHK_43	putative peptidoglycan binding domain-containing protein	LRHM_0046	hypothetical protein	E800_1393	FIG00752743: hypothetical protein			HMPREF0539_0316	peptidoglycan binding domain protein					LC705_00039	YkuG protein	PEL5_2409	FIG00752743: hypothetical protein	PEL6_958	FIG00752743: hypothetical protein
LGG_00046	hypothetical protein	HMPREF0541_00230	hypothetical protein					E800_1392	FIG00744553: hypothetical protein					LRHMDP2_1290	FIG00744553: hypothetical protein	LRHMDP3_217	FIG00744553: hypothetical protein			PEL5_2408	FIG00744553: hypothetical protein	PEL6_957	FIG00744553: hypothetical protein	R0011_06772	hypothetical protein
LGG_00047	hypothetical protein	HMPREF0541_00232	hypothetical protein			LRHM_0047	hypothetical protein	E800_1391	FIG00752743: hypothetical protein	LRH_12784	hypothetical protein			LRHMDP2_1291	FIG00752743: hypothetical protein	LRHMDP3_218	FIG00752743: hypothetical protein			PEL5_2407	FIG00752743: hypothetical protein	PEL6_956	FIG00752743: hypothetical protein	R0011_06777	YkuG protein
LGG_00048	branched-chain amino acid transport protein azlC	HMPREF0541_00233	putative azaleucine resistance protein AzlC	LRHK_44	azlC family protein	LRHM_0048	amino acid transporter protein	E800_1390	FIG00748452: hypothetical protein	LRH_12789	amino acid transport protein	HMPREF0539_0315	LIV-E family branched chain amino acid exporter	LRHMDP2_1292	FIG00748452: hypothetical protein	LRHMDP3_219	FIG00748452: hypothetical protein	LC705_00040	branched-chain amino acid transport protein AzlC	PEL5_2406	FIG00748452: hypothetical protein	PEL6_955	FIG00748452: hypothetical protein	R0011_06782	branched-chain amino acid transport protein AzlC
LGG_00049	branched-chain amino acid transport protein azlD	HMPREF0541_00234	Branched-chain amino acid transport protein	LRHK_45	branched-chain amino acid transport family protein	LRHM_0049	hypothetical protein	E800_1389	FIG028593: membrane protein	LRH_12794	Predicted membrane protein	HMPREF0539_0314	LIV-E family branched chain amino acid exporter AzlD	LRHMDP2_1293	FIG028593: membrane protein	LRHMDP3_220	FIG028593: membrane protein	LC705_00041	branched-chain amino acid transport protein AzlD	PEL5_2405	FIG028593: membrane protein	PEL6_954	FIG028593: membrane protein	R0011_06787	hypothetical protein
LGG_00050	beta-glucuronidase (GH2)	HMPREF0541_00235	glycosyl hydrolase family 2, TIM barrel domain protein	LRHK_46	beta-glucuronidase	LRHM_0050	beta-glucuronidase	E800_1388	Beta-glucuronidase	LRH_12799	Beta-glucuronidase	HMPREF0539_0313	beta-glucuronidase	LRHMDP2_1294	Beta-glucuronidase	LRHMDP3_221	Beta-glucuronidase	LC705_00042	beta-glucuronidase	PEL5_2404	Beta-glucuronidase	PEL6_953	Beta-glucuronidase	R0011_06792	beta-glucuronidase
LGG_00051	glycoside hydrolase	HMPREF0541_00236	hypothetical protein	LRHK_47	carbohydrate binding family 6 domain protein	LRHM_0051	putative fibronectin-binding protein	E800_1387	FIG00746133: hypothetical protein	LRH_12804	glycosyl hydrolase, family 31/fibronectin type III domain protein	HMPREF0539_0312	glycosyl hydrolase, family 31/fibronectin type III domain protein			LRHMDP3_222	FIG00746133: hypothetical protein	LC705_00043	family 59 glycoside hydrolase/fibronectin type III domain-containing protein	PEL5_2403	FIG00746133: hypothetical protein	PEL6_952	FIG00746133: hypothetical protein	R0011_06797	family 59 glycoside hydrolase/fibronectin type III domain-containing protein
LGG_00052	2-dehydro-3-deoxyphosphogluconate aldolase/4-hydroxy-2-oxoglutarate aldolase	HMPREF0541_00939	2-dehydro-3-deoxyphosphogluconate aldolase/4-hydroxy-2-oxoglutarate aldolase	LRHK_48	2-dehydro-3-deoxyphosphogluconate aldolase	LRHM_0052	2-keto-3-deoxy-6-phosphogluconate aldolase	E800_1386	4-Hydroxy-2-oxoglutarate aldolase / 2-dehydro-3-deoxyphosphogluconate aldolase	LRH_12809	2-keto-3-deoxy-6-phosphogluconate aldolase	HMPREF0539_0311	4-hydroxy-2-oxoglutarate aldolase	LRHMDP2_361	4-Hydroxy-2-oxoglutarate aldolase / 2-dehydro-3-deoxyphosphogluconate aldolase	LRHMDP3_224	4-Hydroxy-2-oxoglutarate aldolase / 2-dehydro-3-deoxyphosphogluconate aldolase	LC705_00044	2-dehydro-3-deoxyphosphogluconate aldolase/4-hydroxy-2-oxoglutarate aldolase	PEL5_2402	4-Hydroxy-2-oxoglutarate aldolase / 2-dehydro-3-deoxyphosphogluconate aldolase	PEL6_951	4-Hydroxy-2-oxoglutarate aldolase / 2-dehydro-3-deoxyphosphogluconate aldolase	R0011_06802	2-dehydro-3-deoxyphosphogluconate aldolase/4-hydroxy-2-oxoglutarate aldolase
LGG_00053	2-dehydro-3-deoxygluconokinase	HMPREF0541_00940	putative 2-dehydro-3-deoxygluconokinase	LRHK_49	pfkB carbohydrate kinase family protein	LRHM_0053	2-dehydro-3-deoxygluconokinase	E800_1385	2-dehydro-3-deoxygluconate kinase	LRH_12814	2-dehydro-3-deoxygluconokinase	HMPREF0539_0310	2-dehydro-3-deoxygluconokinase	LRHMDP2_360	2-dehydro-3-deoxygluconate kinase	LRHMDP3_225	2-dehydro-3-deoxygluconate kinase	LC705_00045	2-dehydro-3-deoxygluconokinase	PEL5_2401	2-dehydro-3-deoxygluconate kinase	PEL6_950	2-dehydro-3-deoxygluconate kinase	R0011_06807	2-dehydro-3-deoxygluconokinase
LGG_00054	uronate isomerase	HMPREF0541_00941	glucuronate isomerase	LRHK_50	glucuronate isomerase family protein	LRHM_0054	truncated glucuronate isomerase	E800_1384	Uronate isomerase	LRH_12819	glucuronate isomerase	HMPREF0539_0309	Glucuronate isomerase	LRHMDP2_359	Uronate isomerase	LRHMDP3_226	Uronate isomerase	LC705_00046	glucuronate isomerase	PEL5_2400	Uronate isomerase	PEL6_949	Uronate isomerase	R0011_06812	glucuronate isomerase
LGG_00055	glucuronate isomerase					LRHM_0055	truncated glucuronate isomerase
LGG_00056	mannonate dehydratase	HMPREF0541_00942	mannonate dehydratase	LRHK_51	mannonate dehydratase	LRHM_0056	mannonate dehydratase	E800_1383	Mannonate dehydratase	LRH_12824	mannonate dehydratase	HMPREF0539_0308	Mannonate dehydratase	LRHMDP2_358	Mannonate dehydratase	LRHMDP3_227	Mannonate dehydratase	LC705_00047	mannonate dehydratase	PEL5_2399	Mannonate dehydratase	PEL6_948	Mannonate dehydratase	R0011_06817	mannonate dehydratase
LGG_00057	Mannitol dehydrogenase domain-containing protein	HMPREF0541_00943	mannitol dehydrogenase domain protein	LRHK_52	mannitol dehydrogenase Rossmann domain protein	LRHM_0057	fructuronate reductase	E800_1382	D-mannonate oxidoreductase	LRH_12829	Fructuronate reductase	HMPREF0539_0307	mannitol dehydrogenase	LRHMDP2_357	D-mannonate oxidoreductase	LRHMDP3_228	D-mannonate oxidoreductase	LC705_00048	mannitol dehydrogenase domain-containing protein	PEL5_2398	D-mannonate oxidoreductase	PEL6_947	D-mannonate oxidoreductase	R0011_06822	Mannitol dehydrogenase domain-containing protein
LGG_00058	transporter major facilitator superfamily MFS_1, Melibiose:Na transport protein	HMPREF0541_00945	transporter, major facilitator family protein	LRHK_54	major facilitator superfamily protein	LRHM_0058	putative transporter protein	E800_1381	Putative melibiose:Na(+) transport protein	LRH_12839	Putative melibiose:Na(+) transport protein	HMPREF0539_0305	major facilitator transporter	LRHMDP2_355	Putative melibiose:Na(+) transport protein	LRHMDP3_230	Putative melibiose:Na(+) transport protein	LC705_00050	MFS superfamily Melibiose:Na transport protein	PEL5_2397	Putative melibiose:Na(+) transport protein	PEL6_946	Putative melibiose:Na(+) transport protein	R0011_06832	transporter major facilitator superfamily MFS_1, Melibiose:Na transport protein
LGG_00059	GntR family transcriptional regulator	HMPREF0541_00946	transcriptional regulator, GntR family	LRHK_55	bacterial regulatory s, gntR family protein	LRHM_0059	transcriptional regulator	E800_1380	FIG00743965: hypothetical protein	LRH_12844	Transcriptional regulator	HMPREF0539_0304	GntR family transcriptional regulator	LRHMDP2_354	FIG00743965: hypothetical protein	LRHMDP3_231	FIG00743965: hypothetical protein	LC705_00051	GntR family transcriptional regulator	PEL5_2396	FIG00743965: hypothetical protein	PEL6_945	FIG00743965: hypothetical protein	R0011_06837	transcriptional regulator GntR family protein
LGG_00060	2-dehydro-3-deoxygluconokinase	HMPREF0541_00947	kinase, PfkB family	LRHK_56	2-keto-3-deoxygluconate kinase	LRHM_0060	2-dehydro-3-deoxygluconokinase	E800_1379	2-dehydro-3-deoxyphosphogluconate aldolase / 2-dehydro-3-deoxygluconate kinase	LRH_12849	2-keto-3-deoxy-6-phosphogluconate aldolase and 2-dehydro-3-deoxygluconokinase	HMPREF0539_0303	2-dehydro-3-deoxygluconokinase	LRHMDP2_353	2-dehydro-3-deoxyphosphogluconate aldolase / 2-dehydro-3-deoxygluconate kinase	LRHMDP3_232	2-dehydro-3-deoxyphosphogluconate aldolase / 2-dehydro-3-deoxygluconate kinase	LC705_00052	2-dehydro-3-deoxygluconokinase	PEL5_2395	2-dehydro-3-deoxyphosphogluconate aldolase / 2-dehydro-3-deoxygluconate kinase	PEL6_944	2-dehydro-3-deoxyphosphogluconate aldolase / 2-dehydro-3-deoxygluconate kinase	R0011_06842	2-dehydro-3-deoxygluconokinase
LGG_00061	galactosidase	HMPREF0541_00948	hypothetical protein	LRHK_57	glycosyl hydrolase 59 family protein	LRHM_0061	hypothetical protein	E800_1378	Carbohydrate binding family 6	LRH_12854	hypothetical protein	HMPREF0539_0302	conserved hypothetical protein	LRHMDP2_352	Carbohydrate binding family 6	LRHMDP3_233	Carbohydrate binding family 6	LC705_00053	galactosidase	PEL5_2394	Carbohydrate binding family 6	PEL6_943	Carbohydrate binding family 6	R0011_06847	galactosidase
LGG_00062	hypothetical protein	HMPREF0541_00949	hypothetical protein	LRHK_59	hypothetical protein	LRHM_0062	hypothetical protein	E800_1377	FIG00746526: hypothetical protein	LRH_12859	hypothetical protein	HMPREF0539_0301	conserved hypothetical protein	LRHMDP2_350	FIG00746526: hypothetical protein	LRHMDP3_235	FIG00746526: hypothetical protein	LC705_00054	hypothetical protein	PEL5_2393	FIG00746526: hypothetical protein	PEL6_942	FIG00746526: hypothetical protein	R0011_06852	hypothetical protein
LGG_00063	FMN-binding protein	HMPREF0541_00950	putative FMN-binding protein	LRHK_60	FMN-binding protein	LRHM_0063	putative pyridoxamine 5'-phosphate oxidase	E800_1376	Pyridoxamine 5'-phosphate oxidase-related, FMN-binding	LRH_12864	FMN-binding protein	HMPREF0539_0300	flavin mononucleotide-binding protein	LRHMDP2_349	Pyridoxamine 5'-phosphate oxidase-related, FMN-binding	LRHMDP3_236	Pyridoxamine 5'-phosphate oxidase-related, FMN-binding	LC705_00055	FMN-binding protein	PEL5_2392	Pyridoxamine 5'-phosphate oxidase-related, FMN-binding	PEL6_941	Pyridoxamine 5'-phosphate oxidase-related, FMN-binding	R0011_06857	FMN-binding protein
LGG_00064	transporter major facilitator superfamily MFS_1	HMPREF0541_00951	transporter, major facilitator family protein	LRHK_61	major facilitator superfamily protein	LRHM_0064	transporter protein	E800_1375	permease of the major facilitator superfamily	LRH_12869	permease of the major facilitator superfamily protein	HMPREF0539_0299	MFS family major facilitator transporter	LRHMDP2_348	permease of the major facilitator superfamily	LRHMDP3_237	permease of the major facilitator superfamily	LC705_00056	MFS superfamily transporter	PEL5_2391	permease of the major facilitator superfamily	PEL6_940	permease of the major facilitator superfamily	R0011_06862	MFS superfamily transporter
LGG_00065	alpha/beta hydrolase fold-3			LRHK_62	alpha/beta hydrolase fold family protein	LRHM_0065	hypothetical protein	E800_1374	FIG00750113: hypothetical protein	LRH_12874	hypothetical protein	HMPREF0539_0298	alpha/beta hydrolase fold-3	LRHMDP2_347	FIG00750113: hypothetical protein	LRHMDP3_238	FIG00750113: hypothetical protein	LC705_00057	alpha/beta hydrolase fold-3	PEL5_2390	FIG00750113: hypothetical protein	PEL6_939	FIG00750113: hypothetical protein
LGG_00066	TetR family transcriptional regulator			LRHK_63	bacterial regulatory s, tetR family protein	LRHM_0066	hypothetical protein	E800_1373	FIG00752347: hypothetical protein	LRH_12879	transcriptional regulator, TetR family protein	HMPREF0539_0297	TetR family transcriptional regulator	LRHMDP2_346	FIG00752347: hypothetical protein	LRHMDP3_239	FIG00752347: hypothetical protein	LC705_00058	TetR family transcriptional regulator	PEL5_2389	FIG00752347: hypothetical protein	PEL6_938	FIG00752347: hypothetical protein
LGG_00067	hypothetical protein	HMPREF0541_00953	hypothetical protein	LRHK_64	hypothetical protein	LRHM_0067	hypothetical protein	E800_1372	hypothetical protein	LRH_12884	hypothetical protein	HMPREF0539_0296	conserved hypothetical protein	LRHMDP2_345	hypothetical protein	LRHMDP3_240	hypothetical protein	LC705_00059	hypothetical protein	PEL5_2388	hypothetical protein	PEL6_937	hypothetical protein	R0011_06867	hypothetical protein
LGG_00068	membrane protein	HMPREF0541_00955	MMPL family protein	LRHK_65	MMPL family protein	LRHM_0068	hypothetical protein	E800_1371	FIG00745824: hypothetical protein	LRH_10060	Predicted membrane protein	HMPREF0539_0294	RND superfamily resistance-nodulation-cell division:proton (H+) antiporter	LRHMDP2_344	FIG00745824: hypothetical protein	LRHMDP3_241	FIG00745824: hypothetical protein	LC705_00060	membrane protein	PEL5_2387	FIG00745824: hypothetical protein	PEL6_936	FIG00745824: hypothetical protein	R0011_06872	membrane protein
LGG_00069	TetR family transcriptional regulator	HMPREF0541_00956	transcriptional regulator, TetR family	LRHK_66	bacterial regulatory s, tetR family protein	LRHM_0069	transcriptional regulator	E800_1370	Transcriptional regulator	LRH_10055	Transcriptional regulator	HMPREF0539_0293	transcriptional regulator	LRHMDP2_343	Transcriptional regulator	LRHMDP3_242	Transcriptional regulator	LC705_00061	TetR family transcriptional regulator	PEL5_2386	Transcriptional regulator	PEL6_935	Transcriptional regulator	R0011_06877	TetR family transcriptional regulator
LGG_00070	hypothetical protein	HMPREF0541_00957	hypothetical protein	LRHK_67	sulfite exporter TauE/SafE family protein	LRHM_0070	hypothetical protein	E800_1369	FIG00746772: hypothetical protein	LRH_10050	hypothetical protein	HMPREF0539_0292	protein of hypothetical function	LRHMDP2_342	FIG00746772: hypothetical protein	LRHMDP3_243	FIG00746772: hypothetical protein	LC705_00062	hypothetical protein	PEL5_2385	FIG00746772: hypothetical protein	PEL6_934	FIG00746772: hypothetical protein	R0011_06882	hypothetical protein
LGG_00071	amidohydrolase domain-containing protein	HMPREF0541_00958	amidohydrolase family protein	LRHK_68	amidohydrolase family protein	LRHM_0071	putative amidohydrolase	E800_1368	S-adenosylhomocysteine deaminase; Methylthioadenosine deaminase	LRH_10045	amidohydrolase domain protein	HMPREF0539_0291	possible S-adenosylhomocysteine deaminase	LRHMDP2_341	S-adenosylhomocysteine deaminase; Methylthioadenosine deaminase	LRHMDP3_244	S-adenosylhomocysteine deaminase; Methylthioadenosine deaminase	LC705_00063	amidohydrolase domain-containing protein	PEL5_2384	S-adenosylhomocysteine deaminase; Methylthioadenosine deaminase	PEL6_933	S-adenosylhomocysteine deaminase; Methylthioadenosine deaminase	R0011_06887	amidohydrolase domain-containing protein
LGG_00072	hypothetical protein	HMPREF0541_00959	hypothetical protein	LRHK_69	hypothetical protein	LRHM_0072	hypothetical protein	E800_1367	Membrane protein, putative	LRH_10040	hypothetical protein	HMPREF0539_0290	conserved hypothetical protein	LRHMDP2_340	Membrane protein, putative	LRHMDP3_245	Membrane protein, putative	LC705_00064	hypothetical protein	PEL5_2383	Membrane protein, putative	PEL6_932	Membrane protein, putative	R0011_06892	hypothetical protein
LGG_00073	hypothetical protein	HMPREF0541_00960	hypothetical protein	LRHK_70	hypothetical protein	LRHM_0073	hypothetical protein	E800_1366	membrane protein, putative	LRH_10035	hypothetical protein	HMPREF0539_0289	conserved hypothetical protein	LRHMDP2_339	membrane protein, putative	LRHMDP3_246	membrane protein, putative	LC705_00065	hypothetical protein	PEL5_2382	membrane protein, putative	PEL6_931	membrane protein, putative	R0011_06897	hypothetical protein
LGG_00074	hypothetical protein	HMPREF0541_00961	hypothetical protein	LRHK_71	hypothetical protein	LRHM_0074	hypothetical protein	E800_1365	FIG00745753: hypothetical protein	LRH_10030	hypothetical protein	HMPREF0539_0288	conserved hypothetical protein	LRHMDP2_338	FIG00745753: hypothetical protein	LRHMDP3_247	FIG00745753: hypothetical protein	LC705_00066	hypothetical protein	PEL5_2381	FIG00745753: hypothetical protein	PEL6_930	FIG00745753: hypothetical protein	R0011_06902	hypothetical protein
LGG_00075	binding-protein-dependent transport systems inner membrane component	HMPREF0541_00962	glycine betaine/carnitine/choline transport system permease protein opuCD	LRHK_72	binding--dependent transport system inner membrane component family protein	LRHM_0075	glycine betaine/carnitine/choline ABC transporter ATP-binding component	E800_1364	Osmotically activated L-carnitine/choline ABC transporter, permease protein OpuCD	LRH_10025	glycine betaine/carnitine/choline ABC transporter, ATP-binding protein	HMPREF0539_0287	glycine/betaine/carnitine/choline ABC superfamily ATP binding cassette transporter, membrane protein	LRHMDP2_337	Osmotically activated L-carnitine/choline ABC transporter, permease protein OpuCD	LRHMDP3_248	Osmotically activated L-carnitine/choline ABC transporter, permease protein OpuCD	LC705_00067	binding-protein-dependent transport systems inner membrane component	PEL5_2380	Osmotically activated L-carnitine/choline ABC transporter, permease protein OpuCD	PEL6_929	Osmotically activated L-carnitine/choline ABC transporter, permease protein OpuCD	R0011_06907	binding-protein-dependent transport systems inner membrane component
LGG_00076	glycine/betaine ABC transporter substrate-binding protein	HMPREF0541_00963	glycine betaine/carnitine/choline-binding protein	LRHK_73	glycine betaine/carnitine/choline-binding protein	LRHM_0076	glycine betaine/carnitine/choline ABC transporter substrate binding component	E800_1363	Osmotically activated L-carnitine/choline ABC transporter, substrate-binding protein OpuCC	LRH_10020	Periplasmic glycine betaine/choline-binding (lipo)protein of an ABC-type transport system (osmoprotectant binding	HMPREF0539_0286	glycine betaine/carnitine/choline ABC superfamily ATP binding cassette transporter, binding protein	LRHMDP2_336	Osmotically activated L-carnitine/choline ABC transporter, substrate-binding protein OpuCC	LRHMDP3_249	Osmotically activated L-carnitine/choline ABC transporter, substrate-binding protein OpuCC	LC705_00068	glycine betaine/carnitine/choline ABC transporter substrate-binding protein	PEL5_2379	Osmotically activated L-carnitine/choline ABC transporter, substrate-binding protein OpuCC	PEL6_928	Osmotically activated L-carnitine/choline ABC transporter, substrate-binding protein OpuCC	R0011_06912	glycine betaine/carnitine/choline ABC transporter substrate-binding protein
LGG_00077	binding-protein-dependent transport systems inner membrane component	HMPREF0541_00964	choline transport system permease protein opuBB	LRHK_74	binding--dependent transport system inner membrane component family protein	LRHM_0077	glycine betaine/carnitine/choline ABC transporter permease component	E800_1362	Osmotically activated L-carnitine/choline ABC transporter, permease protein OpuCB	LRH_10015	glycine betaine/carnitine/choline ABC transporter, permease protein	HMPREF0539_0285	glycine/betaine/carnitine/choline ABC superfamily ATP binding cassette transporter, membrane protein	LRHMDP2_335	Osmotically activated L-carnitine/choline ABC transporter, permease protein OpuCB	LRHMDP3_250	Osmotically activated L-carnitine/choline ABC transporter, permease protein OpuCB	LC705_00069	binding-protein-dependent transport systems inner membrane component	PEL5_2378	Osmotically activated L-carnitine/choline ABC transporter, permease protein OpuCB	PEL6_927	Osmotically activated L-carnitine/choline ABC transporter, permease protein OpuCB	R0011_06917	binding-protein-dependent transport systems inner membrane component
LGG_00078	glycine/betaine/L-proline ABC transporter ATP-binding protein	HMPREF0541_00965	choline ABC transporter, ATP-binding protein OpuBA	LRHK_75	glycine betaine/L-proline ABC transporter ATP-binding protein	LRHM_0078	glycine betaine/carnitine/choline ABC transporter ATP-binding component	E800_1361	Osmotically activated L-carnitine/choline ABC transporter, ATP-binding protein OpuCA	LRH_10010	ABC-type proline/glycine betaine transport system, ATPase component	HMPREF0539_0284	possible quaternary-amine-transporting ATPase	LRHMDP2_334	Osmotically activated L-carnitine/choline ABC transporter, ATP-binding protein OpuCA	LRHMDP3_251	Osmotically activated L-carnitine/choline ABC transporter, ATP-binding protein OpuCA	LC705_00070	glycine/betaine/L-proline ABC transporter ATPase	PEL5_2377	Osmotically activated L-carnitine/choline ABC transporter, ATP-binding protein OpuCA	PEL6_926	Osmotically activated L-carnitine/choline ABC transporter, ATP-binding protein OpuCA	R0011_06922	glycine betaine/L-proline ABC transporter ATPase
LGG_00079	hypothetical protein					LRHM_0079	hypothetical protein	E800_1360	hypothetical protein					LRHMDP2_333	hypothetical protein	LRHMDP3_252	hypothetical protein			PEL5_2376	hypothetical protein	PEL6_925	hypothetical protein
LGG_00080	MerR family transcriptional regulator					LRHM_0080	hypothetical protein	E800_1359	transcriptional regulator, MerR family					LRHMDP2_332	Predicted transcriptional regulator	LRHMDP3_253	Predicted transcriptional regulator					PEL6_924	transcriptional regulator, MerR family
LGG_00081	hypothetical protein					LRHM_0081	hypothetical protein	E800_1358	hypothetical protein							LRHMDP3_254	hypothetical protein
LGG_00082	cation transport ATPase	HMPREF0541_00966	heavy metal translocating P-type ATPase	LRHK_76	cadmium-translocating P-type ATPase	LRHM_0082	cation transport ATPase	E800_1357	Lead, cadmium, zinc and mercury transporting ATPase; Copper-translocating P-type ATPase	LRH_10005	Cation transport ATPase	HMPREF0539_0283	P-ATPase superfamily P family ATPase transporter	LRHMDP2_330	Lead, cadmium, zinc and mercury transporting ATPase; Copper-translocating P-type ATPase	LRHMDP3_255	Lead, cadmium, zinc and mercury transporting ATPase; Copper-translocating P-type ATPase	LC705_00071	cation transport ATPase	PEL5_2373	Lead, cadmium, zinc and mercury transporting ATPase; Copper-translocating P-type ATPase	PEL6_922	Lead, cadmium, zinc and mercury transporting ATPase; Copper-translocating P-type ATPase	R0011_06927	cation transport ATPase
LGG_00083	copper chaperone	HMPREF0541_00967	heavy metal-associated domain protein	LRHK_77	heavy-metal-associated domain protein	LRHM_0083	copper chaperone	E800_1356	Copper chaperone	LRH_10000	Copper chaperone	HMPREF0539_0282	MerTP family mercury (Hg2+) permease, binding protein MerP	LRHMDP2_329	Copper chaperone	LRHMDP3_256	Copper chaperone	LC705_00072	copper chaperone	PEL5_2372	Copper chaperone	PEL6_921	Copper chaperone	R0011_06932	copper chaperone
LGG_00084	DNA-binding ferritin-like protein	HMPREF0541_00969	hypothetical protein	LRHK_78	DNA-binding ferritin-like protein	LRHM_0084	DNA-binding protein	E800_1355	Non-specific DNA-binding protein Dps / Iron-binding ferritin-like antioxidant protein / Ferroxidase	LRH_09995	DNA-binding ferritin-like protein (oxidative damage protectant)	HMPREF0539_0281	DNA-binding ferritin family protein (oxidative damage protectant)	LRHMDP2_328	Non-specific DNA-binding protein Dps / Iron-binding ferritin-like antioxidant protein / Ferroxidase	LRHMDP3_257	Non-specific DNA-binding protein Dps / Iron-binding ferritin-like antioxidant protein / Ferroxidase	LC705_00073	DNA-binding ferritin-like protein	PEL5_2371	Non-specific DNA-binding protein Dps / Iron-binding ferritin-like antioxidant protein / Ferroxidase	PEL6_920	Non-specific DNA-binding protein Dps / Iron-binding ferritin-like antioxidant protein / Ferroxidase	R0011_06937	DNA-binding ferritin-like protein
LGG_00085	cyclic nucleotide-binding regulatory protein Crp	HMPREF0541_00970	cyclic nucleotide-binding domain protein	LRHK_79	bacterial regulatory s, crp family protein	LRHM_0085	transcriptional regulator	E800_1354	transcriptional regulator, Crp/Fnr family	LRH_09990	Crp-like transcriptional regulator	HMPREF0539_0280	CRP/FNR family transcriptional regulator	LRHMDP2_327	transcriptional regulator, Crp/Fnr family	LRHMDP3_258	transcriptional regulator, Crp/Fnr family	LC705_00074	transcriptional regulator crp family	PEL5_2370	transcriptional regulator, Crp/Fnr family	PEL6_919	transcriptional regulator, Crp/Fnr family	R0011_06942	cyclic nucleotide-binding regulatory protein Crp
LGG_00086	TetR family transcriptional regulator	HMPREF0541_00971	transcriptional regulator, TetR family			LRHM_0086	hypothetical protein	E800_1353	Transcriptional regulator					LRHMDP2_326	Transcriptional regulator, TetR family	LRHMDP3_259	Transcriptional regulator, TetR family			PEL5_2369	Transcriptional regulator	PEL6_918	Transcriptional regulator	R0011_06947	TetR family transcriptional regulator
LGG_00087	hypothetical protein	HMPREF0541_00972	hypothetical protein			LRHM_0087	hypothetical protein	E800_1352	FIG01115830: hypothetical protein					LRHMDP2_325	hypothetical protein	LRHMDP3_260	hypothetical protein			PEL5_2368	FIG01115830: hypothetical protein	PEL6_917	FIG01115830: hypothetical protein	R0011_06952	hypothetical protein
LGG_00088	hypothetical protein	HMPREF0541_00973	hypothetical protein	LRHK_80	hypothetical protein	LRHM_0088	hypothetical protein			LRH_09985	hypothetical protein	HMPREF0539_0279	conserved hypothetical protein					LC705_00075	hypothetical protein					R0011_06957	hypothetical protein
LGG_00089	metal-dependent membrane protease	HMPREF0541_00974	CAAX amino terminal protease family protein	LRHK_81	CAAX amino terminal protease self- immunity family protein	LRHM_0089	hypothetical protein	E800_1351	CAAX amino terminal protease family	LRH_09980	Predicted metal-dependent membrane protease	HMPREF0539_0278	possible metal-dependent membrane protease	LRHMDP2_324	CAAX amino terminal protease family	LRHMDP3_261	CAAX amino terminal protease family	LC705_00076	metal-dependent membrane protease	PEL5_2367	CAAX amino terminal protease family	PEL6_916	CAAX amino terminal protease family	R0011_06962	metal-dependent membrane protease
LGG_00090	PTS system transporter subunit IICB			LRHK_82	PTS system, Fru family, IIB component domain protein	LRHM_0090	PTS system fructose-specific IIB component	E800_1350	PTS system, fructose-specific IIB component / PTS system, fructose-specific IIC component			HMPREF0539_0277	PTS system, fructose-specific IIBC component					LC705_00077	PTS system transporter subunit IICB	PEL5_2366	PTS system, fructose-specific IIB component / PTS system, fructose-specific IIC component	PEL6_915	PTS system, fructose-specific IIB component / PTS system, fructose-specific IIC component
LGG_00091	hypothetical protein					LRHM_0091	PTS system fructose-specific IIC component
LGG_00092	PTS system transporter subunit IIA			LRHK_83	PTS system, fructose subfamily, IIA component domain protein	LRHM_0092	PTS system cellobiose-specific transporter subunit IIA	E800_1349	PTS system, fructose-specific IIA component			HMPREF0539_0276	PTS system, fructose-specific IIA component					LC705_00078	PTS system transporter subunit IIA	PEL5_2365	PTS system, fructose-specific IIA component	PEL6_914	PTS system, fructose-specific IIA component
LGG_00093	alpha-mannosidase (GH38)			LRHK_84	alpha mannosidase, middle domain protein	LRHM_0093	putative alpha-mannosidase	E800_1348	Alpha-mannosidase			HMPREF0539_0275	possible alpha-mannosidase mngB					LC705_00079	alpha-mannosidase	PEL5_2364	Alpha-mannosidase	PEL6_913	Alpha-mannosidase
LGG_00094	hypothetical protein			LRHK_85	helix-turn-helix domain, rpiR family protein	LRHM_0094	transcriptional regulator	E800_1347	Sialic acid utilization regulator, RpiR family			HMPREF0539_0273	transcriptional regulator					LC705_00080	hypothetical protein	PEL5_2363	Sialic acid utilization regulator, RpiR family	PEL6_912	Sialic acid utilization regulator, RpiR family
LGG_00095	beta-glucosidase (GH1)					LRHM_0095	beta-glucosidase	E800_1346	Beta-glucosidase			HMPREF0539_0272	6-phospho-beta-glucosidase glycoside hydrolase family 1 protein					LC705_00081	beta-glucosidase	PEL5_2362	Beta-glucosidase	PEL6_911	Beta-glucosidase
LGG_00096	ROK family protein			LRHK_88	ROK family protein	LRHM_0096	glucokinase	E800_1345	N-acetylmannosamine kinase			HMPREF0539_0271	ROK family sugar kinase					LC705_00083	ROK family protein	PEL5_2361	N-acetylmannosamine kinase	PEL6_910	N-acetylmannosamine kinase
LGG_00097	hypothetical protein	HMPREF0541_00975	hypothetical protein	LRHK_89	hypothetical protein	LRHM_0097	hypothetical protein	E800_1344	FIG00749776: hypothetical protein	LRH_09975	hypothetical protein	HMPREF0539_0270	conserved hypothetical protein	LRHMDP2_323	FIG00749776: hypothetical protein	LRHMDP3_262	FIG00749776: hypothetical protein	LC705_00084	hypothetical protein	PEL5_2360	FIG00749776: hypothetical protein	PEL6_909	FIG00749776: hypothetical protein	R0011_06967	hypothetical protein
LGG_00098	tryptophan synthase subunit alpha	HMPREF0541_00978	tryptophan synthase, alpha subunit	LRHK_91	tryptophan synthase subunit alpha	LRHM_0098	tryptophan synthase subunit alpha	E800_1342	Tryptophan synthase alpha chain	LRH_09970	Tryptophan synthase alpha chain	HMPREF0539_0268	tryptophan synthase	LRHMDP2_321	Tryptophan synthase alpha chain	LRHMDP3_264	Tryptophan synthase alpha chain	LC705_00085	tryptophan synthase subunit alpha	PEL5_2359	Tryptophan synthase alpha chain	PEL6_908	Tryptophan synthase alpha chain	R0011_06977	tryptophan synthase subunit alpha
LGG_00099	tryptophan synthase subunit beta	HMPREF0541_00979	tryptophan synthase, beta subunit	LRHK_92	tryptophan synthase subunit beta	LRHM_0099	tryptophan synthase subunit beta	E800_2265	Tryptophan synthase beta chain	LRH_09965	tryptophan synthase subunit beta	HMPREF0539_0267	tryptophan synthase	LRHMDP2_320	Tryptophan synthase beta chain	LRHMDP3_265	Tryptophan synthase beta chain	LC705_00086	tryptophan synthase subunit beta	PEL5_2358	Tryptophan synthase beta chain	PEL6_907	Tryptophan synthase beta chain	R0011_06982	tryptophan synthase subunit beta
LGG_00100	N-(5'-phosphoribosyl)anthranilate isomerase	HMPREF0541_00980	N-(5'phosphoribosyl)anthranilate isomerase	LRHK_93	N-(5'phosphoribosyl)anthranilate (PRA) isomerase family protein	LRHM_0100	N-(5'-phosphoribosyl)anthranilate isomerase	E800_2266	Phosphoribosylanthranilate isomerase	LRH_09960	Phosphoribosylanthranilate isomerase	HMPREF0539_0266	phosphoribosylanthranilate isomerase	LRHMDP2_319	Phosphoribosylanthranilate isomerase	LRHMDP3_266	Phosphoribosylanthranilate isomerase	LC705_00087	N-(5'-phosphoribosyl)anthranilate isomerase	PEL5_2357	Phosphoribosylanthranilate isomerase	PEL6_906	Phosphoribosylanthranilate isomerase	R0011_06987	N-(5'-phosphoribosyl)anthranilate isomerase
LGG_00101	indole-3-glycerol-phosphate synthase	HMPREF0541_00981	indole-3-glycerol phosphate synthase	LRHK_94	indole-3-glycerol phosphate synthase family protein	LRHM_0101	indole-3-glycerol phosphate synthase	E800_2267	Indole-3-glycerol phosphate synthase	LRH_09955	Indole-3-glycerol phosphate synthase	HMPREF0539_0265	indole-3-glycerol-phosphate synthase	LRHMDP2_318	Indole-3-glycerol phosphate synthase	LRHMDP3_267	Indole-3-glycerol phosphate synthase	LC705_00088	indole-3-glycerol-phosphate synthase	PEL5_2356	Indole-3-glycerol phosphate synthase	PEL6_905	Indole-3-glycerol phosphate synthase	R0011_06992	indole-3-glycerol-phosphate synthase
LGG_00102	anthranilate phosphoribosyltransferase	HMPREF0541_00982	anthranilate phosphoribosyltransferase	LRHK_95	anthranilate phosphoribosyltransferase	LRHM_0102	anthranilate phosphoribosyltransferase	E800_2268	Anthranilate phosphoribosyltransferase	LRH_09950	Anthranilate phosphoribosyltransferase	HMPREF0539_0264	anthranilate phosphoribosyltransferase	LRHMDP2_317	Anthranilate phosphoribosyltransferase	LRHMDP3_268	Anthranilate phosphoribosyltransferase	LC705_00089	anthranilate phosphoribosyltransferase	PEL5_2355	Anthranilate phosphoribosyltransferase	PEL6_904	Anthranilate phosphoribosyltransferase	R0011_06997	anthranilate phosphoribosyltransferase
LGG_00103	hypothetical protein			LRHK_96	anthranilate phosphoribosyltransferase			E800_2269	hypothetical protein	LRH_09945	hypothetical protein							LC705_00090	hypothetical protein	PEL5_2354	hypothetical protein	PEL6_903	hypothetical protein
LGG_00104	transporter major facilitator superfamily MFS_1	HMPREF0541_00983	drug resistance MFS transporter, drug:H+ antiporter-2 family	LRHK_97	H+ antiporter-2 family protein	LRHM_0104	transporter protein	E800_2271	FIG00752013: hypothetical protein	LRH_09915	permease of the major facilitator superfamily protein	HMPREF0539_0263	drug resistance transporter EmrB/QacA subfamily precursor	LRHMDP2_312	FIG00752013: hypothetical protein	LRHMDP3_273	FIG00752013: hypothetical protein	LC705_00091	MFS superfamily transporter	PEL5_2352	FIG00752013: hypothetical protein	PEL6_901	FIG00752013: hypothetical protein	R0011_07002	transporter major facilitator superfamily MFS_1
LGG_00105	TetR family transcriptional regulator	HMPREF0541_00984	transcriptional regulator, TetR family	LRHK_98	bacterial regulatory s, tetR family protein	LRHM_0105	transcriptional regulator	E800_2272	Transcriptional regulator	LRH_09910	Transcriptional regulator	HMPREF0539_0262	transcriptional regulator	LRHMDP2_311	Transcriptional regulator	LRHMDP3_274	Transcriptional regulator	LC705_00092	TetR family transcriptional regulator	PEL5_2351	Transcriptional regulator	PEL6_900	Transcriptional regulator	R0011_07007	transcriptional regulator tetR family protein
LGG_00106	hypothetical protein	HMPREF0541_00985	hypothetical protein	LRHK_99	hypothetical protein	LRHM_0106	hypothetical protein	E800_2273	FIG00744634: hypothetical protein	LRH_09905	hypothetical protein	HMPREF0539_0261	conserved hypothetical protein	LRHMDP2_310	FIG00744634: hypothetical protein	LRHMDP3_275	FIG00744634: hypothetical protein	LC705_00093	hypothetical protein	PEL5_2350	FIG00744634: hypothetical protein	PEL6_899	FIG00744634: hypothetical protein	R0011_07012	hypothetical protein
LGG_00107	dTDP-4-dehydrorhamnose 3,5-epimerase	HMPREF0541_00989	putative dTDP-4-dehydrorhamnose 3,5-epimerase	LRHK_104	dTDP-4-dehydrorhamnose 3, 5-epimerase family protein	LRHM_0107	putative dTDP-4-dehydrorhamnose 3,5-epimerase	E800_2275	dTDP-4-dehydrorhamnose 3,5-epimerase			HMPREF0539_0256	possible dTDP-4-dehydrorhamnose 3,5-epimerase					LC705_00098	dTDP-4-dehydrorhamnose 3,5-epimerase	PEL5_2349	dTDP-4-dehydrorhamnose 3,5-epimerase	PEL6_898	dTDP-4-dehydrorhamnose 3,5-epimerase	R0011_07022	dTDP-4-dehydrorhamnose 3,5-epimerase
LGG_00108	dihydrodipicolinate reductase	HMPREF0541_00990	dihydrodipicolinate reductase	LRHK_105	dihydrodipicolinate reductase	LRHM_0108	dihydrodipicolinate reductase	E800_2276	Dihydrodipicolinate reductase	LRH_08098	Dihydrodipicolinate reductase	HMPREF0539_0255	dihydrodipicolinate reductase	LRHMDP2_304	Dihydrodipicolinate reductase	LRHMDP3_281	Dihydrodipicolinate reductase	LC705_00099	dihydrodipicolinate reductase	PEL5_2348	Dihydrodipicolinate reductase	PEL6_897	Dihydrodipicolinate reductase	R0011_07027	dihydrodipicolinate reductase
LGG_00109	dihydrodipicolinate synthase	HMPREF0541_00991	dihydrodipicolinate synthase	LRHK_106	dihydrodipicolinate synthase	LRHM_0109	dihydrodipicolinate synthase	E800_2277	Dihydrodipicolinate synthase	LRH_08103	Dihydrodipicolinate synthase/N-acetylneuraminate lyase	HMPREF0539_0254	dihydrodipicolinate synthase	LRHMDP2_303	Dihydrodipicolinate synthase	LRHMDP3_282	Dihydrodipicolinate synthase	LC705_00100	dihydrodipicolinate synthase	PEL5_2347	Dihydrodipicolinate synthase	PEL6_896	Dihydrodipicolinate synthase	R0011_07032	dihydrodipicolinate synthase
LGG_00110	peptidase, M20/M25/M40 family	HMPREF0541_00992	amidohydrolase	LRHK_108	amidohydrolase family protein	LRHM_0110	amidohydrolase	E800_2278	N-acetyl-L,L-diaminopimelate deacetylase	LRH_08108	Metal-dependent amidase/aminoacylase/carboxypeptidase	HMPREF0539_0252	possible hippurate hydrolase	LRHMDP2_301	N-acetyl-L,L-diaminopimelate deacetylase	LRHMDP3_284	N-acetyl-L,L-diaminopimelate deacetylase	LC705_00102	peptidase, M20/M25/M40 family	PEL5_2346	N-acetyl-L,L-diaminopimelate deacetylase	PEL6_895	N-acetyl-L,L-diaminopimelate deacetylase	R0011_07037	peptidase, M20/M25/M40 family protein
LGG_00111	2,3,4,5-tetrahydropyridine-2-carboxylate N-succinyltransferase	HMPREF0541_00993	2,3,4,5-tetrahydropyridine-2,6-dicarboxylate N-acetyltransferase	LRHK_109	2, 3, 4, 5-tetrahydropyridine-2, 6-dicarboxylate N-acetyltransferase	LRHM_0111	tetrahydrodipicolinate N-succinyltransferase	E800_2279	2,3,4,5-tetrahydropyridine-2,6-dicarboxylate N-acetyltransferase	LRH_08113	Tetrahydrodipicolinate N-succinyltransferase	HMPREF0539_0251	2,3,4,5-tetrahydropyridine-2,6-dicarboxylate N-succinyltransferase	LRHMDP2_300	2,3,4,5-tetrahydropyridine-2,6-dicarboxylate N-acetyltransferase	LRHMDP3_285	2,3,4,5-tetrahydropyridine-2,6-dicarboxylate N-acetyltransferase	LC705_00103	2,3,4,5-tetrahydropyridine-2-carboxylate N-succinyltransferase	PEL5_2345	2,3,4,5-tetrahydropyridine-2,6-dicarboxylate N-acetyltransferase	PEL6_894	2,3,4,5-tetrahydropyridine-2,6-dicarboxylate N-acetyltransferase	R0011_07042	2,3,4,5-tetrahydropyridine-2-carboxylate N-succinyltransferase
LGG_00112	diaminopimelate decarboxylase	HMPREF0541_00994	diaminopimelate decarboxylase	LRHK_110	diaminopimelate decarboxylase	LRHM_0112	diaminopimelate decarboxylase	E800_2280	Diaminopimelate decarboxylase	LRH_08118	Diaminopimelate decarboxylase	HMPREF0539_0250	diaminopimelate decarboxylase	LRHMDP2_299	Diaminopimelate decarboxylase	LRHMDP3_286	Diaminopimelate decarboxylase	LC705_00104	diaminopimelate decarboxylase	PEL5_2344	Diaminopimelate decarboxylase	PEL6_893	Diaminopimelate decarboxylase	R0011_07047	diaminopimelate decarboxylase
LGG_00113	aspartate kinase	HMPREF0541_00997	aspartate kinase	LRHK_112	aspartate kinase domain protein	LRHM_0113	aspartate kinase	E800_2282	Aspartokinase	LRH_08123	aspartate kinase	HMPREF0539_0248	aspartate kinase	LRHMDP2_297	Aspartokinase	LRHMDP3_288	Aspartokinase	LC705_00105	aspartate kinase	PEL5_2342	Aspartokinase	PEL6_892	Aspartokinase	R0011_07052	aspartate kinase
LGG_00114	diaminopimelate epimerase	HMPREF0541_00998	diaminopimelate epimerase	LRHK_113	diaminopimelate epimerase	LRHM_0114	diaminopimelate epimerase	E800_2283	Diaminopimelate epimerase	LRH_08128	diaminopimelate epimerase	HMPREF0539_0247	diaminopimelate epimerase	LRHMDP2_296	Diaminopimelate epimerase	LRHMDP3_289	Diaminopimelate epimerase	LC705_00106	diaminopimelate epimerase	PEL5_2341	Diaminopimelate epimerase	PEL6_891	Diaminopimelate epimerase	R0011_07057	diaminopimelate epimerase
LGG_00115	aspartate-semialdehyde dehydrogenase	HMPREF0541_00999	aspartate-semialdehyde dehydrogenase	LRHK_114	aspartate-semialdehyde dehydrogenase	LRHM_0115	aspartate-semialdehyde dehydrogenase	E800_2284	Aspartate-semialdehyde dehydrogenase	LRH_08133	Aspartate-semialdehyde dehydrogenase	HMPREF0539_0246	aspartate-semialdehyde dehydrogenase	LRHMDP2_295	Aspartate-semialdehyde dehydrogenase	LRHMDP3_290	Aspartate-semialdehyde dehydrogenase	LC705_00107	aspartate-semialdehyde dehydrogenase	PEL5_2340	Aspartate-semialdehyde dehydrogenase	PEL6_890	Aspartate-semialdehyde dehydrogenase	R0011_07062	aspartate-semialdehyde dehydrogenase
LGG_00116	hypothetical protein	HMPREF0541_01000	hypothetical protein	LRHK_115	hypothetical protein	LRHM_0116	hypothetical protein	E800_2285	FIG00742814: hypothetical protein	LRH_08138	hypothetical protein	HMPREF0539_0245	conserved hypothetical protein	LRHMDP2_294	FIG00742814: hypothetical protein	LRHMDP3_291	FIG00742814: hypothetical protein	LC705_00108	hypothetical protein	PEL5_2339	FIG00742814: hypothetical protein	PEL6_889	FIG00742814: hypothetical protein	R0011_07067	hypothetical protein
LGG_00117	transcriptional regulator					LRHM_0117	hypothetical protein	E800_2286	Transcriptional regulator, XRE family	LRH_08143	putative regulatory protein			LRHMDP2_292	Transcriptional regulator, XRE family	LRHMDP3_293	Transcriptional regulator, XRE family			PEL5_2338	Transcriptional regulator, XRE family	PEL6_888	hypothetical protein
LGG_00118	ADP-ribose pyrophosphatase	HMPREF0541_01001	hydrolase, NUDIX family	LRHK_116	NUDIX domain-containing protein	LRHM_0118	ADP-ribose pyrophosphatase	E800_2287	FIG00752706: hypothetical protein	LRH_08148	ADP-ribose pyrophosphatase	HMPREF0539_0244	ADP-ribose pyrophosphatase	LRHMDP2_291	FIG00752706: hypothetical protein	LRHMDP3_294	FIG00752706: hypothetical protein	LC705_00109	ADP-ribose pyrophosphatase	PEL5_2337	FIG00752706: hypothetical protein	PEL6_887	FIG00752706: hypothetical protein	R0011_07072	ADP-ribose pyrophosphatase
LGG_00119	drug/metabolite transporter superfamily permease	HMPREF0541_01002	putative membrane protein	LRHK_117	eamA-like transporter family protein	LRHM_0119	transporter protein	E800_2288	Permease of the drug/metabolite transporter (DMT) superfamily	LRH_08153	permease of the drug/metabolite transporter (DMT) superfamily protein	HMPREF0539_0243	permease of the drug/metabolite transporter (DMT) superfamily protein	LRHMDP2_290	Permease of the drug/metabolite transporter (DMT) superfamily	LRHMDP3_295	Permease of the drug/metabolite transporter (DMT) superfamily	LC705_00110	drug/metabolite transporter (DMT) superfamily permease	PEL5_2336	Permease of the drug/metabolite transporter (DMT) superfamily	PEL6_886	Permease of the drug/metabolite transporter (DMT) superfamily	R0011_07077	drug/metabolite transporter superfamily permease
LGG_00120	hypothetical protein	HMPREF0541_01003	hypothetical protein	LRHK_118	hypothetical protein	LRHM_0120	hypothetical protein	E800_2289	hypothetical protein	LRH_08158	hypothetical protein	HMPREF0539_0242	conserved hypothetical protein	LRHMDP2_288	hypothetical protein	LRHMDP3_297	hypothetical protein	LC705_00111	hypothetical protein	PEL5_2335	hypothetical protein	PEL6_885	hypothetical protein	R0011_07082	hypothetical protein
LGG_00121	phosphoesterase, DHH family protein	HMPREF0541_01011	DHHA1 domain protein	LRHK_125	DHH family protein	LRHM_0121	putative phosphoesterase	E800_2290	Phosphoesterase, DHH family protein	LRH_08163	Signaling protein (consists of PAS, a modified GGDEF and a DHH family phosphatase domains)	HMPREF0539_0235	DHH family phosphoesterase	LRHMDP2_280	Phosphoesterase, DHH family protein	LRHMDP3_305	Phosphoesterase, DHH family protein	LC705_00118	phosphoesterase, DHH family protein	PEL5_2334	Phosphoesterase, DHH family protein	PEL6_884	Phosphoesterase, DHH family protein	R0011_07117	phosphoesterase, DHH family protein
LGG_00122	50S ribosomal protein L9	HMPREF0541_01012	ribosomal protein L9	LRHK_126	50S ribosomal protein L9	LRHM_0122	50S ribosomal protein L9	E800_2291	LSU ribosomal protein L9p	LRH_08168	Ribosomal protein L9	HMPREF0539_0234	ribosomal protein L9	LRHMDP2_279	LSU ribosomal protein L9p	LRHMDP3_306	LSU ribosomal protein L9p	LC705_00119	50S ribosomal protein L9	PEL5_2333	LSU ribosomal protein L9p	PEL6_883	LSU ribosomal protein L9p	R0011_07122	50S ribosomal protein L9
LGG_00123	Replicative DNA helicase	HMPREF0541_01013	replicative DNA helicase	LRHK_127	replicative DNA helicase	LRHM_0123	replicative DNA helicase	E800_2292	Replicative DNA helicase [SA14-24]	LRH_08173	Replicative DNA helicase	HMPREF0539_0233	replicative DNA helicase DnaB	LRHMDP2_278	Replicative DNA helicase [SA14-24]	LRHMDP3_307	Replicative DNA helicase [SA14-24]	LC705_00120	replicative DNA helicase	PEL5_2332	Replicative DNA helicase [SA14-24]	PEL6_882	Replicative DNA helicase [SA14-24]	R0011_07127	replicative DNA helicase
LGG_00124	hypothetical protein	HMPREF0541_01014	hypothetical protein	LRHK_128	hypothetical protein	LRHM_0124	hypothetical protein	E800_2293	FIG00742210: hypothetical protein	LRH_08178	hypothetical protein	HMPREF0539_0232	conserved hypothetical protein	LRHMDP2_277	FIG00742210: hypothetical protein	LRHMDP3_308	FIG00742210: hypothetical protein	LC705_00121	hypothetical protein	PEL5_2331	FIG00742210: hypothetical protein	PEL6_881	FIG00742210: hypothetical protein	R0011_07132	hypothetical protein
LGG_00125	PTS system sucrose-specific transporter subunit IIABC	HMPREF0541_01015	phosphotransferase system, EIIC	LRHK_129	PTS system, glucose subfamily, IIA component domain protein	LRHM_0125	PTS system sucrose-specific IIABC components	E800_2294	PTS system, sucrose-specific IIB component / PTS system, sucrose-specific IIC component	LRH_08183	sucrose-specific PTS system IIBC component	HMPREF0539_0231	protein-N(pi)-phosphohistidine--sugar phosphotransferase	LRHMDP2_276	PTS system, sucrose-specific IIB component / PTS system, sucrose-specific IIC component	LRHMDP3_309	PTS system, sucrose-specific IIB component / PTS system, sucrose-specific IIC component	LC705_00122	PTS system sucrose-specific transporter subunit IIABC	PEL5_2330	PTS system, sucrose-specific IIB component / PTS system, sucrose-specific IIC component	PEL6_880	PTS system, sucrose-specific IIB component / PTS system, sucrose-specific IIC component	R0011_07137	PTS system sucrose-specific transporter subunit IIABC
LGG_00126	N-acetylmuramic acid-6-phosphate etherase	HMPREF0541_01016	N-acetylmuramic acid 6-phosphate etherase	LRHK_130	N-acetylmuramic acid 6-phosphate etherase	LRHM_0126	N-acetylmuramic acid 6-phosphate etherase	E800_2295	N-acetylmuramic acid 6-phosphate etherase	LRH_08188	N-acetylmuramic acid-6-phosphate etherase	HMPREF0539_0230	sugar phosphate isomerase	LRHMDP2_275	N-acetylmuramic acid 6-phosphate etherase	LRHMDP3_310	N-acetylmuramic acid 6-phosphate etherase	LC705_00123	N-acetylmuramic acid-6-phosphate etherase	PEL5_2329	N-acetylmuramic acid 6-phosphate etherase	PEL6_879	N-acetylmuramic acid 6-phosphate etherase	R0011_07142	N-acetylmuramic acid-6-phosphate etherase
LGG_00127	outer surface protein	HMPREF0541_01017	hypothetical protein	LRHK_131	hypothetical protein	LRHM_0127	hypothetical protein	E800_2296	Outer surface protein of unknown function, cellobiose operon	LRH_08193	hypothetical protein	HMPREF0539_0229	outer surface protein	LRHMDP2_274	Outer surface protein of unknown function, cellobiose operon	LRHMDP3_311	Outer surface protein of unknown function, cellobiose operon	LC705_00124	Outer surface protein	PEL5_2328	Outer surface protein of unknown function, cellobiose operon	PEL6_878	Outer surface protein of unknown function, cellobiose operon	R0011_07147	outer surface protein
LGG_00128	RpiR family transcriptional regulator	HMPREF0541_01018	transcriptional regulator, RpiR family	LRHK_132	helix-turn-helix domain, rpiR family protein	LRHM_0128	transcriptional regulator	E800_2297	Transcriptional regulator, RpiR family	LRH_08198	Transcriptional regulator	HMPREF0539_0228	bifunctional RpiR family transcriptional regulator/sugar isomerase	LRHMDP2_273	Transcriptional regulator, RpiR family	LRHMDP3_312	Transcriptional regulator, RpiR family	LC705_00125	transcriptional regulator RpiR family	PEL5_2327	Transcriptional regulator, RpiR family	PEL6_877	Transcriptional regulator, RpiR family	R0011_07152	RpiR family transcriptional regulator
LGG_00129	TetR family transcriptional regulator	HMPREF0541_01019	transcriptional regulator, TetR family	LRHK_133	bacterial regulatory s, tetR family protein	LRHM_0129	hypothetical protein	E800_2298	Transcriptional regulator, TetR family	LRH_08203	putative transcriptional regulator	HMPREF0539_0227	probable transcriptional regulator	LRHMDP2_272	Transcriptional regulator, TetR family	LRHMDP3_313	Transcriptional regulator, TetR family	LC705_00126	TetR family transcriptional regulator	PEL5_2326	Transcriptional regulator, TetR family	PEL6_876	Transcriptional regulator, TetR family	R0011_07157	TetR family transcriptional regulator
LGG_00130	ABC transporter ATP-binding protein	HMPREF0541_01020	ABC transporter, ATP-binding protein	LRHK_134	ABC transporter family protein	LRHM_0130	antimicrobial peptide ABC transporter ATP-binding component	E800_2299	ABC transporter ATP-binding protein YvcR	LRH_08208	putative ABC transporter, ATP-binding protein	HMPREF0539_0226	ABC superfamily ATP binding cassette transporter, ABC protein	LRHMDP2_271	ABC transporter ATP-binding protein YvcR	LRHMDP3_314	ABC transporter ATP-binding protein YvcR	LC705_00127	ABC transporter ATPase	PEL5_2325	ABC transporter ATP-binding protein YvcR	PEL6_875	ABC transporter ATP-binding protein YvcR	R0011_07162	ABC transporter ATPase
LGG_00131	ABC transporter permease	HMPREF0541_01021	efflux ABC transporter, permease protein	LRHK_135	ftsX-like permease family protein	LRHM_0131	antimicrobial peptide ABC transporter permease component	E800_2300	ABC transporter permease protein	LRH_08213	ABC transporter	HMPREF0539_0225	ABC superfamily ATP binding cassette transporter	LRHMDP2_270	ABC transporter permease protein	LRHMDP3_315	ABC transporter permease protein	LC705_00128	ABC transporter permease	PEL5_2324	ABC transporter permease protein	PEL6_874	ABC transporter permease protein	R0011_07167	ABC transporter permease
LGG_00132	metal-dependent hydrolase	HMPREF0541_01022	amidohydrolase family protein	LRHK_136	metal-dependent hydrolase	LRHM_0132	amidohydrolase	E800_2301	metal-dependent hydrolase (putative)	LRH_08218	metal-dependent hydrolase (putative)	HMPREF0539_0224	amidohydrolase 2	LRHMDP2_269	metal-dependent hydrolase (putative)	LRHMDP3_316	metal-dependent hydrolase (putative)	LC705_00129	metal-dependent hydrolase	PEL5_2323	metal-dependent hydrolase (putative)	PEL6_873	metal-dependent hydrolase (putative)	R0011_07172	metal-dependent hydrolase
LGG_00133	adenylosuccinate synthetase	HMPREF0541_01023	adenylosuccinate synthase	LRHK_137	adenylosuccinate synthase	LRHM_0133	adenylosuccinate synthase	E800_2302	Adenylosuccinate synthetase	LRH_08223	Adenylosuccinate synthase	HMPREF0539_0223	adenylosuccinate synthase	LRHMDP2_268	Adenylosuccinate synthetase	LRHMDP3_317	Adenylosuccinate synthetase	LC705_00130	adenylosuccinate synthetase	PEL5_2322	Adenylosuccinate synthetase	PEL6_872	Adenylosuccinate synthetase	R0011_07177	adenylosuccinate synthetase
LGG_00134	hypothetical protein					LRHM_0134	hypothetical protein													PEL5_2321	Malolactic regulator	PEL6_871	Malolactic regulator
LGG_00135	heavy metal-transporting ATPase	HMPREF0541_01025	cadmium-exporting ATPase	LRHK_139	cadmium-translocating P-type ATPase	LRHM_0135	copper-transporting ATPase	E800_2304	Lead, cadmium, zinc and mercury transporting ATPase; Copper-translocating P-type ATPase	LRH_08228	Cation transport ATPase	HMPREF0539_0221	P-ATPase superfamily P family ATPase metal transporter	LRHMDP2_267	Lead, cadmium, zinc and mercury transporting ATPase; Copper-translocating P-type ATPase	LRHMDP3_318	Lead, cadmium, zinc and mercury transporting ATPase; Copper-translocating P-type ATPase	LC705_00133	heavy metal-transporting ATPase	PEL5_2320	Lead, cadmium, zinc and mercury transporting ATPase; Copper-translocating P-type ATPase	PEL6_870	Lead, cadmium, zinc and mercury transporting ATPase; Copper-translocating P-type ATPase	R0011_07182	heavy metal-transporting ATPase
LGG_00136	ArsR family transcriptional regulator	HMPREF0541_01026	transcriptional regulator, ArsR family	LRHK_140	bacterial regulatory, arsR family protein	LRHM_0136	putative transcriptional regulator	E800_2305	FIG00747962: hypothetical protein	LRH_08233	Predicted transcriptional regulator	HMPREF0539_0220	possible transcriptional regulator	LRHMDP2_266	FIG00747962: hypothetical protein	LRHMDP3_319	FIG00747962: hypothetical protein	LC705_00134	ArsR family transcriptional regulator	PEL5_2319	FIG00747962: hypothetical protein	PEL6_869	FIG00747962: hypothetical protein	R0011_07187	ArsR family transcriptional regulator
LGG_00137	transporter major facilitator superfamily MFS_1, tetracycline resistance protein			LRHK_141	major facilitator superfamily protein	LRHM_0137	putative transporter protein	E800_2307	FIG00743292: hypothetical protein	LRH_08238	Permease, MDR related, probably tetracycline resistance protein	HMPREF0539_0219	major facilitator transporter	LRHMDP2_265	FIG00743292: hypothetical protein	LRHMDP3_320	FIG00743292: hypothetical protein	LC705_00135	MFS superfamily tetracycline resistance protein	PEL5_2317	FIG00743292: hypothetical protein	PEL6_867	FIG00743292: hypothetical protein
LGG_00138	anaerobic ribonucleoside triphosphate reductase	HMPREF0541_01031	anaerobic ribonucleoside-triphosphate reductase	LRHK_146	anaerobic ribonucleoside-triphosphate reductase	LRHM_0138	anaerobic ribonucleoside triphosphate reductase	E800_2312	Ribonucleotide reductase of class III (anaerobic), large subunit	LRH_08243	anaerobic ribonucleoside triphosphate reductase	HMPREF0539_0214	ribonucleoside-triphosphate reductase	LRHMDP2_263	Ribonucleotide reductase of class III (anaerobic), large subunit	LRHMDP3_322	Ribonucleotide reductase of class III (anaerobic), large subunit	LC705_00140	anaerobic ribonucleoside triphosphate reductase	PEL5_2316	Ribonucleotide reductase of class III (anaerobic), large subunit	PEL6_866	Ribonucleotide reductase of class III (anaerobic), large subunit	R0011_07212	anaerobic ribonucleoside triphosphate reductase
LGG_00139	hypothetical protein	HMPREF0541_01032	hypothetical protein			LRHM_0139	hypothetical protein	E800_2313	FIG00748149: hypothetical protein	LRH_08248	hypothetical protein	HMPREF0539_0212	conserved hypothetical protein					LC705_00142	hypothetical protein	PEL5_2315	FIG00748149: hypothetical protein	PEL6_865	FIG00748149: hypothetical protein	R0011_07217	hypothetical protein
LGG_00140	hypothetical protein	HMPREF0541_01033	hypothetical protein			LRHM_0140	hypothetical protein			LRH_12889	hypothetical protein													R0011_07222	hypothetical protein
LGG_00141	hypothetical protein	HMPREF0541_01035	hypothetical protein			LRHM_0141	hypothetical protein			LRH_12899	hypothetical protein			LRHMDP2_262	hypothetical protein	LRHMDP3_323	hypothetical protein			PEL5_2314	hypothetical protein	PEL6_864	hypothetical protein	R0011_07227	hypothetical protein
LGG_00142	XRE family transcriptional regulator	HMPREF0541_01037	DNA-binding helix-turn-helix protein	LRHK_149	bacteriophage CI repressor helix-turn-helix domain protein	LRHM_0142	transcriptional regulator	E800_2314	Transcriptional regulator, xre family	LRH_12904	Transcriptional regulator, xre family protein	HMPREF0539_0211	xre family transcriptional regulator	LRHMDP2_261	Transcriptional regulator, xre family	LRHMDP3_324	Transcriptional regulator, xre family	LC705_00143	XRE family transcriptional regulator	PEL5_2313	Transcriptional regulator, xre family	PEL6_863	Transcriptional regulator, xre family	R0011_07232	XRE family transcriptional regulator
LGG_00143	hypothetical protein					LRHM_0143	hypothetical protein			LRH_03453	hypothetical protein									PEL5_959	predicted ORF	PEL6_1677	predicted ORF
LGG_00144	transposase					LRHM_0144	putative transposase											LC705_00588	transposase	PEL5_1379	Mobile element protein	PEL6_427	Mobile element protein
LGG_00145	membrane-associated phospholipid phosphatase	HMPREF0541_01039	PAP2 family protein	LRHK_150	PAP2 superfamily protein	LRHM_0145	phospholipid phosphatase	E800_2316	Membrane-associated phospholipid phosphatase	LRH_01587	Membrane-associated phospholipid phosphatase	HMPREF0539_0210	membrane-associated phospholipid phosphatase	LRHMDP2_259	Membrane-associated phospholipid phosphatase	LRHMDP3_326	Membrane-associated phospholipid phosphatase	LC705_00144	membrane-associated phospholipid phosphatase	PEL5_1378	Membrane-associated phospholipid phosphatase	PEL6_426	Membrane-associated phospholipid phosphatase	R0011_07237	membrane-associated phospholipid phosphatase
LGG_00146	MccC family protein	HMPREF0541_01040	LD-carboxypeptidase	LRHK_151	LD-carboxypeptidase family protein	LRHM_0146	microcin C7 resistance protein	E800_2317	Muramoyltetrapeptide carboxypeptidase	LRH_01592	Microcin C7 resistance MccF related protein	HMPREF0539_0209	microcin C7 resistance MccF family protein	LRHMDP2_258	Muramoyltetrapeptide carboxypeptidase	LRHMDP3_327	Muramoyltetrapeptide carboxypeptidase	LC705_00145	MccC family protein	PEL5_1377	Muramoyltetrapeptide carboxypeptidase	PEL6_425	Muramoyltetrapeptide carboxypeptidase	R0011_07242	MccC family protein
LGG_00147	hypothetical protein	HMPREF0541_01042	hypothetical protein	LRHK_153	hypothetical protein	LRHM_0147	hypothetical protein	E800_2319	FIG00752962: hypothetical protein	LRH_01597	hypothetical protein	HMPREF0539_0208	conserved hypothetical protein	LRHMDP2_256	FIG00752962: hypothetical protein	LRHMDP3_329	FIG00752962: hypothetical protein	LC705_00146	hypothetical protein	PEL5_1376	FIG00752962: hypothetical protein	PEL6_424	FIG00752962: hypothetical protein	R0011_07252	hypothetical protein
LGG_00148	D-alanine--D-alanine ligase	HMPREF0541_01043	D-ala D-ala ligase protein	LRHK_154	D-alanine--D-alanine ligase	LRHM_0148	D-alanine--D-alanine ligase	E800_2320	D-alanine--D-alanine ligase	LRH_01602	D-alanine-D-alanine ligase related ATP-grasp enzyme	HMPREF0539_0207	D-alanine--D-alanine ligase	LRHMDP2_255	D-alanine--D-alanine ligase	LRHMDP3_330	D-alanine--D-alanine ligase	LC705_00147	D-alanine--D-alanine ligase	PEL5_1375	D-alanine--D-alanine ligase	PEL6_423	D-alanine--D-alanine ligase	R0011_07257	D-alanine--D-alanine ligase
LGG_00149	hypothetical protein	HMPREF0541_01044	hypothetical protein	LRHK_155	hypothetical protein	LRHM_0149	hypothetical protein	E800_2321	FIG00747972: hypothetical protein	LRH_01607	hypothetical protein	HMPREF0539_0206	conserved hypothetical protein	LRHMDP2_254	FIG00747972: hypothetical protein	LRHMDP3_331	FIG00747972: hypothetical protein	LC705_00148	hypothetical protein	PEL5_1374	FIG00747972: hypothetical protein	PEL6_422	FIG00747972: hypothetical protein	R0011_07262	hypothetical protein
LGG_00150	hypothetical protein	HMPREF0541_01046	hypothetical protein	LRHK_156	hypothetical protein	LRHM_0150	hypothetical protein	E800_2322	FIG00747471: hypothetical protein	LRH_01617	hypothetical protein	HMPREF0539_0205	conserved hypothetical protein	LRHMDP2_253	FIG00747471: hypothetical protein	LRHMDP3_332	FIG00747471: hypothetical protein	LC705_00149	hypothetical protein	PEL5_1373	FIG00747471: hypothetical protein	PEL6_421	FIG00747471: hypothetical protein	R0011_07272	hypothetical protein
LGG_00151	transporter major facilitator superfamily MFS_1	HMPREF0541_01047	drug resistance MFS transporter, drug:H+ antiporter-2 family	LRHK_157	H+ antiporter-2 family protein	LRHM_0151	putative transporter protein	E800_2323	Permeases of the major facilitator superfamily	LRH_01622	hypothetical protein	HMPREF0539_0204	MFS family major facilitator transporter, multidrug:cation symporter	LRHMDP2_252	Permeases of the major facilitator superfamily	LRHMDP3_333	Permeases of the major facilitator superfamily	LC705_00150	MFS superfamily transporter	PEL5_1372	Permeases of the major facilitator superfamily	PEL6_420	Permeases of the major facilitator superfamily	R0011_07277	MFS superfamily transporter
LGG_00152	transposase					LRHM_0152	putative transposase					HMPREF0539_3126	transposase
LGG_00153	transposase IS4 family protein			LRHK_2634	transposase DDE domain protein	LRHM_0153	putative transposase	E800_213	Mobile element protein	LRH_10452	putative transposase									PEL5_1371	Mobile element protein	PEL6_419	Mobile element protein
LGG_00154	hypothetical protein	HMPREF0541_01048	hypothetical protein	LRHK_158	hypothetical protein	LRHM_0154	hypothetical protein	E800_2324	FIG00754201: hypothetical protein	LRH_09555	hypothetical protein	HMPREF0539_0203	conserved hypothetical protein	LRHMDP2_251	FIG00754201: hypothetical protein	LRHMDP3_334	FIG00754201: hypothetical protein	LC705_00151	hypothetical protein	PEL5_1370	FIG00754201: hypothetical protein	PEL6_418	FIG00754201: hypothetical protein	R0011_07282	hypothetical protein
LGG_00155	two component sensor transduction histidine kinase	HMPREF0541_01049	ATPase/histidine kinase/DNA gyrase B/HSP90 domain protein	LRHK_159	HAMP domain protein	LRHM_0155	two-component sensor kinase	E800_2325	FIG00744054: hypothetical protein	LRH_09560	Signal transduction histidine kinase	HMPREF0539_0202	sensor histidine kinase	LRHMDP2_250	FIG00744054: hypothetical protein	LRHMDP3_335	FIG00744054: hypothetical protein	LC705_00152	two component sensor transduction histidine kinase	PEL5_1369	FIG00744054: hypothetical protein	PEL6_417	FIG00744054: hypothetical protein	R0011_07287	two component sensor transduction histidine kinase
LGG_00156	two-component response regulator	HMPREF0541_01050	putative heme response regulator HssR	LRHK_160	transcriptional regulatory, C terminal family protein	LRHM_0156	two-component response regulator	E800_2326	DNA-binding response regulator, OmpR family	LRH_09565	DNA-binding response regulator, OmpR family (Rec-wHTH domains)	HMPREF0539_0201	response regulator	LRHMDP2_249	DNA-binding response regulator, OmpR family	LRHMDP3_336	DNA-binding response regulator, OmpR family	LC705_00153	two-component response regulator	PEL5_1368	DNA-binding response regulator, OmpR family	PEL6_416	DNA-binding response regulator, OmpR family	R0011_07292	two-component response regulator
LGG_00157	methylated DNA-protein cysteine methyltransferase	HMPREF0541_01051	putative methylated-DNA--[protein]-cysteine S-methyltransferase	LRHK_161	methylated-DNA-[]-cysteine S-methyltransferase family protein	LRHM_0157	methylated-DNA--protein-cysteinemethyltransferase	E800_2327	Methylated-DNA--protein-cysteinemethyltransferase	LRH_09570	Methylated DNA-protein cysteine methyltransferase	HMPREF0539_0200	possible methylated-DNA--[protein]-cysteine S-methyltransferase	LRHMDP2_248	Methylated-DNA--protein-cysteinemethyltransferase	LRHMDP3_337	Methylated-DNA--protein-cysteinemethyltransferase	LC705_00154	methylated DNA-protein cysteine methyltransferase	PEL5_1367	Methylated-DNA--protein-cysteinemethyltransferase	PEL6_415	Methylated-DNA--protein-cysteinemethyltransferase	R0011_07297	methylated DNA-protein cysteine methyltransferase
LGG_00158	D-lactate dehydrogenase	HMPREF0541_01052	D-2-hydroxyisocaproate dehydrogenase	LRHK_162	D-lactate dehydrogenase	LRHM_0158	D-lactate dehydrogenase	E800_2328	D-lactate dehydrogenase	LRH_09575	Lactate dehydrogenase	HMPREF0539_0199	D-lactate dehydrogenase	LRHMDP2_247	D-lactate dehydrogenase	LRHMDP3_338	D-lactate dehydrogenase	LC705_00155	D-lactate dehydrogenase	PEL5_1366	D-lactate dehydrogenase	PEL6_414	D-lactate dehydrogenase	R0011_07302	D-lactate dehydrogenase
LGG_00159	PTS system cellobiose-specific transporter subunit IIB			LRHK_163	PTS system, Lactose/Cellobiose specific IIB subunit	LRHM_0159	PTS system cellobiose-specific IIB component	E800_2329	PTS system, cellobiose-specific IIB component	LRH_09580	cellobiose-specific PTS system IIB component	HMPREF0539_0198	protein-N(pi)-phosphohistidine--sugar phosphotransferase	LRHMDP2_246	PTS system, cellobiose-specific IIB component	LRHMDP3_339	PTS system, cellobiose-specific IIB component	LC705_00156	PTS system cellobiose-specific transporter subunit IIB	PEL5_1365	PTS system, cellobiose-specific IIB component	PEL6_413	PTS system, cellobiose-specific IIB component
LGG_00160	PTS system cellobiose-specific transporter subunit IIA			LRHK_164	PTS system, Lactose/Cellobiose specific IIA subunit	LRHM_0160	PTS system cellobiose-specific transporter subunit IIA	E800_2330	PTS system, cellobiose-specific IIA component	LRH_09585	cellobiose-specific PTS system IIA component	HMPREF0539_0197	PTS family lactose/cellobiose porter component IIA	LRHMDP2_245	PTS system, cellobiose-specific IIA component	LRHMDP3_340	PTS system, cellobiose-specific IIA component	LC705_00157	PTS system cellobiose-specific transporter subunit IIA	PEL5_1364	PTS system, cellobiose-specific IIA component	PEL6_412	PTS system, cellobiose-specific IIA component
LGG_00161	PTS system cellobiose-specific transporter subunit IIC			LRHK_165	hypothetical protein	LRHM_0161	hypothetical protein	E800_2331	FIG00742439: hypothetical protein	LRH_09590	hypothetical protein	HMPREF0539_0196	cellobiose PTS family porter IIA component	LRHMDP2_244	FIG00742439: hypothetical protein	LRHMDP3_341	FIG00742439: hypothetical protein	LC705_00158	PTS system cellobiose-specific transporter subunit IIC	PEL5_1363	FIG00742439: hypothetical protein	PEL6_411	FIG00742439: hypothetical protein
LGG_00162	cellobiose phosphotransferase system IIC component			LRHK_166	PTS system, lactose/cellobiose IIC component family protein	LRHM_0162	PTS system cellobiose-specific transporter subunit IIC	E800_2332	PTS system, cellobiose-specific IIC component	LRH_09595	cellobiose phosphotransferase system IIC component	HMPREF0539_0195	PTS family lactose-N,N'-diacetylchitobiose-beta-glucoside (lac) porter component IIC	LRHMDP2_243	PTS system, cellobiose-specific IIC component	LRHMDP3_342	PTS system, cellobiose-specific IIC component	LC705_00159	cellobiose phosphotransferase system IIC component	PEL5_1362	PTS system, cellobiose-specific IIC component	PEL6_410	PTS system, cellobiose-specific IIC component
LGG_00163	6-phospho-beta-glucosidase			LRHK_167	6-phospho-beta-glucosidase	LRHM_0163	6-phospho-beta-glucosidase	E800_2333	6-phospho-beta-glucosidase	LRH_09600	Beta-glucosidase/6-phospho-beta- glucosidase/beta-galactosidase	HMPREF0539_0194	6-phospho-beta-glucosidase	LRHMDP2_242	6-phospho-beta-glucosidase	LRHMDP3_343	6-phospho-beta-glucosidase	LC705_00160	6-phospho-beta-glucosidase	PEL5_1361	6-phospho-beta-glucosidase	PEL6_409	6-phospho-beta-glucosidase
LGG_00164	GntR family transcriptional regulator			LRHK_168	bacterial regulatory s, gntR family protein	LRHM_0164	transcriptional regulator	E800_2334	Predicted transcriptional regulator of N-Acetylglucosamine utilization, GntR family	LRH_09605	Transcriptional regulator	HMPREF0539_0193	GntR family transcriptional regulator	LRHMDP2_241	Predicted transcriptional regulator of N-Acetylglucosamine utilization, GntR family	LRHMDP3_344	Predicted transcriptional regulator of N-Acetylglucosamine utilization, GntR family	LC705_00161	GntR family transcriptional regulator	PEL5_1360	Predicted transcriptional regulator of N-Acetylglucosamine utilization, GntR family	PEL6_408	Predicted transcriptional regulator of N-Acetylglucosamine utilization, GntR family
LGG_00165	hypothetical protein	HMPREF0541_01053	hypothetical protein	LRHK_169	hypothetical protein	LRHM_0165	hypothetical protein	E800_2335	FIG00745671: hypothetical protein	LRH_09610	hypothetical protein	HMPREF0539_0192	conserved hypothetical protein	LRHMDP2_240	FIG00745671: hypothetical protein	LRHMDP3_345	FIG00745671: hypothetical protein	LC705_00162	hypothetical protein	PEL5_1359	FIG00745671: hypothetical protein	PEL6_407	FIG00745671: hypothetical protein	R0011_07307	hypothetical protein
LGG_00166	membrane protein	HMPREF0541_01054	hypothetical protein	LRHK_170	hypothetical protein	LRHM_0166	hypothetical protein	E800_2336	Integral membrane protein	LRH_09615	Predicted membrane protein	HMPREF0539_0191	membrane protein	LRHMDP2_239	Integral membrane protein	LRHMDP3_346	Integral membrane protein	LC705_00163	membrane protein	PEL5_1358	Integral membrane protein	PEL6_406	Integral membrane protein	R0011_07312	membrane protein
LGG_00167	hypothetical protein	HMPREF0541_01055	hypothetical protein	LRHK_171	hypothetical protein	LRHM_0167	hypothetical protein	E800_2337	Uncharacterized protein UPF0344	LRH_09620	hypothetical protein	HMPREF0539_0190	conserved hypothetical protein	LRHMDP2_238	Uncharacterized protein UPF0344	LRHMDP3_347	Uncharacterized protein UPF0344	LC705_00164	hypothetical protein	PEL5_1357	Uncharacterized protein UPF0344	PEL6_405	Uncharacterized protein UPF0344	R0011_07317	hypothetical protein
LGG_00168	Xanthine/uracil permease family protein	HMPREF0541_01056	putative permease	LRHK_172	permease family protein	LRHM_0168	xanthine/uracil transporter protein	E800_2338	Guanine-hypoxanthine permease	LRH_09625	Xanthine/uracil/vitamin C permease	HMPREF0539_0189	NCS2 family nucleobase:cation symporter-2	LRHMDP2_237	Guanine-hypoxanthine permease	LRHMDP3_348	Guanine-hypoxanthine permease	LC705_00165	xanthine/uracil permease family protein	PEL5_1356	Guanine-hypoxanthine permease	PEL6_404	Guanine-hypoxanthine permease	R0011_07322	xanthine/uracil permease family protein
LGG_00169	hypothetical protein	HMPREF0541_01057	hypothetical protein	LRHK_173	dsrE/DsrF-like family protein	LRHM_0169	hypothetical protein	E800_2339	FIG00745365: hypothetical protein	LRH_09630	hypothetical protein	HMPREF0539_0188	conserved hypothetical protein	LRHMDP2_236	FIG00745365: hypothetical protein	LRHMDP3_349	FIG00745365: hypothetical protein	LC705_00166	hypothetical protein	PEL5_1355	FIG00745365: hypothetical protein	PEL6_403	FIG00745365: hypothetical protein	R0011_07327	hypothetical protein
LGG_00170	hypothetical protein							E800_2340	hypothetical protein											PEL5_1354	hypothetical protein	PEL6_402	hypothetical protein
LGG_00171	hypothetical protein									LRH_09635	hypothetical protein
LGG_00172	taurine ABC transporter ATP-binding protein	HMPREF0541_01059	ABC transporter, ATP-binding protein			LRHM_0172	taurine ABC transporter ATP-binding component	E800_2342	ABC transporter ATP-binding protein	LRH_09640	taurine ABC transporter, ATP-binding protein									PEL5_1352	ABC transporter ATP-binding protein	PEL6_400	ABC transporter ATP-binding protein	R0011_07337	taurine ABC transporter ATP-binding protein
LGG_00173	aliphatic sulfonate ABC transporter substrate-binding protein	HMPREF0541_01060	putative taurine ABC transporter, periplasmic binding protein			LRHM_0173	taurine ABC transporter substrate binding component	E800_2343	Substrate-binding region of ABC-type glycine betaine transport system	LRH_09645	aliphatic sulfonates family ABC transporter, periplsmic ligand-binding protein									PEL5_1351	Substrate-binding region of ABC-type glycine betaine transport system	PEL6_399	Substrate-binding region of ABC-type glycine betaine transport system	R0011_07342	ABC transporter aliphatic sulfonates family ligand-binding protein
LGG_00174	taurine transport system permease	HMPREF0541_01061	ABC transporter, permease protein			LRHM_0174	taurine ABC transporter permease component	E800_2344	taurine transport system permease protein tauC	LRH_09650	taurine transport system permease protein tauC									PEL5_1350	taurine transport system permease protein tauC	PEL6_398	taurine transport system permease protein tauC	R0011_07347	taurine transport system permease
LGG_00175	pyridine nucleotide-disulfide oxidoreductase family protein	HMPREF0541_01062	pyridine nucleotide-disulfide oxidoreductase			LRHM_0175	pyridine nucleotide-disulfide oxidoreductase	E800_2345	CoA-disulfide reductase	LRH_09655	NADH oxidase (putative)									PEL5_1349	CoA-disulfide reductase	PEL6_397	CoA-disulfide reductase	R0011_07352	pyridine nucleotide-disulfide oxidoreductase family protein
LGG_00176	membrane protein	HMPREF0541_01063	YeeE/YedE family protein			LRHM_0176	putative transporter protein	E800_2346	protein of unknown function DUF395, YeeE/YedE	LRH_09660	putative membrane protein									PEL5_1348	protein of unknown function DUF395, YeeE/YedE	PEL6_396	protein of unknown function DUF395, YeeE/YedE	R0011_07357	membrane protein
LGG_00177	LysR family transcriptional regulator	HMPREF0541_01064	LysR substrate binding domain protein			LRHM_0177	putative transcriptional regulator	E800_2347	Transcriptional regulator, LysR family	LRH_09665	Transcriptional regulator									PEL5_1347	Transcriptional regulator, LysR family	PEL6_395	Transcriptional regulator, LysR family	R0011_07362	transcriptional regulator
LGG_00178	glyoxalase family protein	HMPREF0541_00922	glyoxalase family protein	LRHK_174	bleomycin resistance protein	LRHM_0178	glyoxalase			LRH_09670	Lactoylglutathione lyase related lyase	HMPREF0539_0187	lactoylglutathione lyase	LRHMDP2_235	Glyoxalase family protein	LRHMDP3_350	Glyoxalase family protein	LC705_00167	glyoxalase family protein	PEL5_1346	Glyoxalase family protein	PEL6_394	Glyoxalase family protein	R0011_07377	glyoxalase family protein
LGG_00179	hypothetical protein	HMPREF0541_00920	hypothetical protein	LRHK_175	hypothetical protein	LRHM_0179	hypothetical protein	E800_309	FIG00743722: hypothetical protein	LRH_09675	hypothetical protein	HMPREF0539_0185	conserved hypothetical protein	LRHMDP2_234	FIG00743722: hypothetical protein	LRHMDP3_351	FIG00743722: hypothetical protein	LC705_00168	hypothetical protein	PEL5_1345	FIG00743722: hypothetical protein	PEL6_393	FIG00743722: hypothetical protein	R0011_07382	hypothetical protein
LGG_00180	alanine acetyl transferase	HMPREF0541_00919	hypothetical protein	LRHK_176	alanine acetyl transferase	LRHM_0180	hypothetical protein	E800_310	unknown	LRH_09680	hypothetical protein	HMPREF0539_0184	conserved hypothetical protein	LRHMDP2_233	unknown	LRHMDP3_352	unknown	LC705_00169	alanine acetyl transferase	PEL5_1344	unknown	PEL6_392	unknown	R0011_07387	alanine acetyl transferase
LGG_00181	hypothetical protein	HMPREF0541_00918	hypothetical protein	LRHK_177	hypothetical protein	LRHM_0181	hypothetical protein	E800_311	Flagellar hook-length control protein FliK	LRH_09685	hypothetical protein	HMPREF0539_0183	conserved hypothetical protein	LRHMDP2_231	Flagellar hook-length control protein FliK	LRHMDP3_354	Flagellar hook-length control protein FliK	LC705_00170	hypothetical protein	PEL5_1343	Flagellar hook-length control protein FliK	PEL6_391	Flagellar hook-length control protein FliK	R0011_07392	hypothetical protein
LGG_00182	extracellular protein	HMPREF0541_00917	hypothetical protein	LRHK_178	extracellular protein	LRHM_0182	hypothetical protein	E800_312	FIG00745489: hypothetical protein	LRH_09690	hypothetical protein	HMPREF0539_0182	conserved hypothetical protein	LRHMDP2_230	FIG00745489: hypothetical protein	LRHMDP3_355	FIG00745489: hypothetical protein	LC705_00171	extracellular protein	PEL5_1342	FIG00745489: hypothetical protein	PEL6_390	FIG00745489: hypothetical protein	R0011_07397	extracellular protein
LGG_00183	cell surface protein	HMPREF0541_00916	hypothetical protein	LRHK_179	ubiD family decarboxylase	LRHM_0183	putative cell surface protein	E800_313	extracellular protein	LRH_09695	cell surface protein	HMPREF0539_0181	WxL domain surface protein	LRHMDP2_229	extracellular protein	LRHMDP3_356	extracellular protein	LC705_00172	cell surface protein	PEL5_1341	extracellular protein	PEL6_389	extracellular protein	R0011_07402	cell surface protein
LGG_00184	cell surface protein	HMPREF0541_00915	hypothetical protein	LRHK_180	hypothetical protein	LRHM_0184	putative cell surface protein	E800_314	cell surface protein precursor	LRH_09700	cell surface protein	HMPREF0539_0180	cell surface protein	LRHMDP2_228	cell surface protein precursor	LRHMDP3_357	cell surface protein precursor	LC705_00173	cell surface protein	PEL5_1340	cell surface protein precursor	PEL6_388	cell surface protein precursor	R0011_07407	cell surface protein
LGG_00185	hypothetical protein	HMPREF0541_00914	hypothetical protein	LRHK_181	hypothetical protein	LRHM_0185	hypothetical protein	E800_315	FIG00747047: hypothetical protein	LRH_09705	hypothetical protein	HMPREF0539_0179	conserved hypothetical protein	LRHMDP2_227	FIG00747047: hypothetical protein	LRHMDP3_358	FIG00747047: hypothetical protein	LC705_00174	hypothetical protein	PEL5_1339	FIG00747047: hypothetical protein	PEL6_387	FIG00747047: hypothetical protein	R0011_07412	hypothetical protein
LGG_00186	hypothetical protein	HMPREF0541_00913	M protein trans-acting positive regulator	LRHK_182	mga helix-turn-helix domain protein	LRHM_0186	hypothetical protein	E800_316	FIG00742462: hypothetical protein	LRH_09710	hypothetical protein	HMPREF0539_0178	conserved hypothetical protein	LRHMDP2_226	FIG00742462: hypothetical protein	LRHMDP3_359	FIG00742462: hypothetical protein	LC705_00175	hypothetical protein	PEL5_1338	FIG00742462: hypothetical protein	PEL6_386	FIG00742462: hypothetical protein	R0011_07417	hypothetical protein
LGG_00187	membrane protein	HMPREF0541_00912	hypothetical protein	LRHK_183	hypothetical protein	LRHM_0187	hypothetical protein	E800_2453	FIG028593: membrane protein	LRH_09715	Predicted membrane protein	HMPREF0539_0177	membrane protein	LRHMDP2_225	FIG028593: membrane protein	LRHMDP3_360	FIG028593: membrane protein	LC705_00176	membrane protein	PEL5_1337	FIG028593: membrane protein	PEL6_385	FIG028593: membrane protein	R0011_07422	membrane protein
LGG_00188	hypothetical protein	HMPREF0541_00911	hypothetical protein	LRHK_184	hypothetical protein	LRHM_0188	hypothetical protein	E800_2452	FIG00745783: hypothetical protein	LRH_09720	hypothetical protein	HMPREF0539_0176	conserved hypothetical protein	LRHMDP2_224	FIG00745783: hypothetical protein	LRHMDP3_361	FIG00745783: hypothetical protein	LC705_00177	hypothetical protein	PEL5_1336	FIG00745783: hypothetical protein	PEL6_384	FIG00745783: hypothetical protein	R0011_07427	hypothetical protein
LGG_00189	recombination factor protein RarA	HMPREF0541_00910	putative replication-associated recombination protein A	LRHK_185	putative ATPase related to the helicase subunit of the holliday junction resolvase	LRHM_0189	recombination factor protein RarA	E800_2451	ATPase, AAA family	LRH_09725	recombination factor protein RarA	HMPREF0539_0175	recombination ATPase	LRHMDP2_223	ATPase, AAA family	LRHMDP3_362	ATPase, AAA family	LC705_00178	recombination factor protein RarA	PEL5_1335	ATPase, AAA family	PEL6_383	ATPase, AAA family	R0011_07432	recombination factor protein RarA
LGG_00190	acetate kinase	HMPREF0541_00909	acetate kinase	LRHK_186	acetate kinase 1	LRHM_0190	acetate kinase	E800_921	Acetate kinase	LRH_06996	Acetate kinase	HMPREF0539_0174	acetate kinase	LRHMDP2_222	Acetate kinase	LRHMDP3_363	Acetate kinase	LC705_00179	acetate kinase	PEL5_1333	Acetate kinase	PEL6_382	Acetate kinase	R0011_07437	acetate kinase A/propionate kinase 2
LGG_00191	DeoR family transcriptional regulator	HMPREF0541_00908	transcriptional regulator, DeoR family	LRHK_187	bacterial regulatory s, deoR family protein	LRHM_0191	putative transcriptional regulator	E800_920	regulatory protein, DeoR	LRH_07001	transcriptional regulator, DeoR family protein	HMPREF0539_0173	DeoR family transcriptional regulator	LRHMDP2_221	regulatory protein, DeoR	LRHMDP3_364	regulatory protein, DeoR	LC705_00180	transcriptional regulator DeoR family	PEL5_1332	regulatory protein, DeoR	PEL6_381	regulatory protein, DeoR	R0011_07442	transcriptional regulator DeoR family protein
LGG_00192	xylulokinase	HMPREF0541_00907	carbohydrate kinase, FGGY family protein	LRHK_188	FGGY family carbohydrate kinase	LRHM_0192	putative xylulokinase	E800_919	Xylulose kinase	LRH_07006	xylulokinase	HMPREF0539_0172	xylulokinase	LRHMDP2_220	Xylulose kinase	LRHMDP3_365	Xylulose kinase	LC705_00181	xylulokinase	PEL5_1331	Xylulose kinase	PEL6_380	Xylulose kinase	R0011_07447	xylulokinase
LGG_00193	fructose-bisphosphate aldolase	HMPREF0541_00906	ketose-bisphosphate aldolase	LRHK_189	ketose-bisphosphate aldolases family protein	LRHM_0193	putative fructose-bisphosphate	E800_918	5-keto-2-deoxy-D-gluconate-6 phosphate aldolase	LRH_07011	tagatose-1,6-bisphosphate aldolase	HMPREF0539_0171	5-dehydro-2-deoxyphosphogluconate aldolase	LRHMDP2_219	5-keto-2-deoxy-D-gluconate-6 phosphate aldolase	LRHMDP3_366	5-keto-2-deoxy-D-gluconate-6 phosphate aldolase	LC705_00182	fructose-bisphosphate aldolase	PEL5_1330	5-keto-2-deoxy-D-gluconate-6 phosphate aldolase	PEL6_379	5-keto-2-deoxy-D-gluconate-6 phosphate aldolase	R0011_07452	fructose-bisphosphate aldolase
LGG_00194	PTS system ascorbate-specific transporter subunit IIC	HMPREF0541_00905	putative sugar-specific permease, SgaT/UlaA	LRHK_190	PTS system sugar-specific permease component family protein	LRHM_0194	putative sugar permease	E800_917	Transport protein SgaT, putative	LRH_07016	ascorbate-specific permease IIC component UlaA	HMPREF0539_0170	PTS family porter component IIC	LRHMDP2_218	Transport protein SgaT, putative	LRHMDP3_367	Transport protein SgaT, putative	LC705_00183	PTS system ascorbate-specific transporter subunit IIC	PEL5_1329	Transport protein SgaT, putative	PEL6_378	Transport protein SgaT, putative	R0011_07457	PTS system ascorbate-specific transporter subunit IIC
LGG_00195	diadenosine tetraphosphatase-like serine/threonine protein phosphatase	HMPREF0541_00904	Ser/Thr phosphatase family protein	LRHK_191	calcineurin-like phosphoesterase family protein	LRHM_0195	serine-threonine protein phosphatase	E800_916	Serine/threonine protein phosphatase	LRH_07021	Diadenosine tetraphosphatase related serine/threonine protein phosphatase	HMPREF0539_0169	serine/threonine protein phosphatase	LRHMDP2_217	Serine/threonine protein phosphatase	LRHMDP3_368	Serine/threonine protein phosphatase	LC705_00184	diadenosine tetraphosphatase-like serine/threonine protein phosphatase	PEL5_1328	Serine/threonine protein phosphatase	PEL6_377	Serine/threonine protein phosphatase	R0011_07462	diadenosine tetraphosphatase-like serine/threonine protein phosphatase
LGG_00196	endonuclease III	HMPREF0541_00903	base excision DNA repair protein, HhH-GPD family	LRHK_192	hhH-GPD superbase excision DNA repair family protein	LRHM_0196	putative endonuclease III	E800_915	endonuclease III domain protein	LRH_07026	Endonuclease III related protein	HMPREF0539_0168	deoxyribonuclease (pyrimidine dimer)	LRHMDP2_216	endonuclease III domain protein	LRHMDP3_369	endonuclease III domain protein	LC705_00185	endonuclease III	PEL5_1327	endonuclease III domain protein	PEL6_376	endonuclease III domain protein	R0011_07467	hypothetical protein
LGG_00197	transporter major facilitator superfamily MFS_1	HMPREF0541_00902	transporter, major facilitator family protein	LRHK_193	major facilitator superfamily protein	LRHM_0197	transporter protein	E800_914	permease of the major facilitator superfamily	LRH_07031	permease of the major facilitator superfamily protein	HMPREF0539_0167	MFS family major facilitator transporter	LRHMDP2_215	permease of the major facilitator superfamily	LRHMDP3_370	permease of the major facilitator superfamily	LC705_00186	MFS superfamily transporter	PEL5_1326	permease of the major facilitator superfamily	PEL6_375	permease of the major facilitator superfamily	R0011_07472	MFS superfamily transporter
LGG_00198	hypothetical protein			LRHK_201	hypothetical protein	LRHM_0198	hypothetical protein	E800_913	FIG00744936: hypothetical protein	LRH_07036	hypothetical protein	HMPREF0539_0160	conserved hypothetical protein	LRHMDP2_214	FIG00744936: hypothetical protein	LRHMDP3_371	FIG00744936: hypothetical protein	LC705_00192	hypothetical protein	PEL5_1325	FIG00744936: hypothetical protein	PEL6_374	FIG00744936: hypothetical protein	R0011_07477	hypothetical protein
LGG_00199	hypothetical protein			LRHK_202	hypothetical protein	LRHM_0199	hypothetical protein	E800_912	FIG00745638: hypothetical protein	LRH_07041	hypothetical protein	HMPREF0539_0159	conserved hypothetical protein	LRHMDP2_213	FIG00745638: hypothetical protein	LRHMDP3_372	FIG00745638: hypothetical protein	LC705_00193	hypothetical protein	PEL5_1324	FIG00745638: hypothetical protein	PEL6_373	FIG00745638: hypothetical protein	R0011_07482	hypothetical protein
LGG_00200	phosphoketolase	HMPREF0541_00900	D-xylulose 5-phosphate/D-fructose 6-phosphate phosphoketolase	LRHK_203	xylulose-5-phosphate phosphoketolase	LRHM_0200	putative phosphoketolase	E800_911	Xylulose-5-phosphate phosphoketolase; Fructose-6-phosphate phosphoketolase	LRH_07046	putative phosphoketolase	HMPREF0539_0158	phosphoketolase	LRHMDP2_212	Xylulose-5-phosphate phosphoketolase; Fructose-6-phosphate phosphoketolase	LRHMDP3_373	Xylulose-5-phosphate phosphoketolase; Fructose-6-phosphate phosphoketolase	LC705_00194	putative phosphoketolase	PEL5_1323	Xylulose-5-phosphate phosphoketolase; Fructose-6-phosphate phosphoketolase	PEL6_372	Xylulose-5-phosphate phosphoketolase; Fructose-6-phosphate phosphoketolase	R0011_07487	putative phosphoketolase
LGG_00201	ABC transporter oligopeptide-binding protein	HMPREF0541_00899	ABC transporter, substrate-binding protein, family 5	LRHK_204	bacterial extracellular solute-binding s, 5 Middle family protein	LRHM_0201	oligopeptide ABC transporter substrate-binding protein	E800_910	Oligopeptide ABC transporter, periplasmic oligopeptide-binding protein OppA (TC 3.A.1.5.1)	LRH_07051	ABC-type oligopeptide transport system, periplasmic component	HMPREF0539_0157	oligopeptide ABC superfamily ATP binding cassette transporter, binding protein	LRHMDP2_211	Oligopeptide ABC transporter, periplasmic oligopeptide-binding protein OppA (TC 3.A.1.5.1)	LRHMDP3_374	Oligopeptide ABC transporter, periplasmic oligopeptide-binding protein OppA (TC 3.A.1.5.1)	LC705_00195	oligopeptide ABC transporter substrate-binding protein	PEL5_1322	Oligopeptide ABC transporter, periplasmic oligopeptide-binding protein OppA (TC 3.A.1.5.1)	PEL6_371	Oligopeptide ABC transporter, periplasmic oligopeptide-binding protein OppA (TC 3.A.1.5.1)	R0011_07492	ABC transporter oligopeptide-binding protein
LGG_00202	hypothetical protein	HMPREF0541_00898	hypothetical protein	LRHK_205	hypothetical protein	LRHM_0202	hypothetical protein			LRH_07056	hypothetical protein	HMPREF0539_0156	conserved hypothetical protein	LRHMDP2_210	FIG00743978: hypothetical protein	LRHMDP3_375	FIG00743978: hypothetical protein	LC705_00196	hypothetical protein	PEL5_1321	FIG00743978: hypothetical protein	PEL6_370	FIG00743978: hypothetical protein	R0011_07497	hypothetical protein
LGG_00203	hypothetical protein	HMPREF0541_00897	hypothetical protein	LRHK_206	hypothetical protein	LRHM_0203	hypothetical protein	E800_765	FIG00749520: hypothetical protein	LRH_09505	hypothetical protein	HMPREF0539_0155	conserved hypothetical protein	LRHMDP2_209	FIG00749520: hypothetical protein	LRHMDP3_376	FIG00749520: hypothetical protein	LC705_00197	hypothetical protein	PEL5_1320	FIG00749520: hypothetical protein	PEL6_369	FIG00749520: hypothetical protein	R0011_07502	hypothetical protein
LGG_00204	PTS system mannose/fructose/N-acetylgalactosamine-specific transporter	HMPREF0541_00896	hypothetical protein	LRHK_207	hypothetical protein	LRHM_0204	truncated PTS system mannose/fructose/N-acetylgalactosamine-specific-specific IID component	E800_764	ABC transporter, ATP-binding protein	LRH_09500	Phosphotransferase system, mannose/fructose/N-acetylgalactosamine-specific	HMPREF0539_0154	PTS family porter, mannose/fructose/N-acetylgalactosamine-specific					LC705_00198	phosphotransferase system, mannose/fructose/N-acetylgalactosamine-specific	PEL5_1319	ABC transporter, ATP-binding protein	PEL6_368	ABC transporter, ATP-binding protein	R0011_07507	phosphotransferase system, mannose/fructose/N-acetylgalactosamine-specific
LGG_00205	ABC transporter ATP-binding protein	HMPREF0541_00895	ABC transporter, ATP-binding protein	LRHK_208	ABC transporter family protein	LRHM_0205	truncated PTS system mannose/fructose/N-acetylgalactosamine-specific-specific IID component			LRH_09495	Phosphotransferase system, mannose/fructose/N-acetylgalactosamine-specific	HMPREF0539_0153	ABC superfamily ATP binding cassette transporter, ABC protein	LRHMDP2_208	ABC transporter, ATP-binding protein	LRHMDP3_377	ABC transporter, ATP-binding protein	LC705_00199	ABC transporter ATPase					R0011_07512	ABC transporter ATPase
LGG_00206	hypothetical protein	HMPREF0541_00894	hypothetical protein	LRHK_209	hypothetical protein	LRHM_0206	hypothetical protein	E800_763	FIG00743977: hypothetical protein	LRH_09490	hypothetical protein	HMPREF0539_0152	conserved hypothetical protein	LRHMDP2_207	FIG00743977: hypothetical protein	LRHMDP3_378	FIG00743977: hypothetical protein	LC705_00200	hypothetical protein	PEL5_1318	FIG00743977: hypothetical protein	PEL6_367	FIG00743977: hypothetical protein	R0011_07517	hypothetical protein
LGG_00207	phosphohydrolase, MutT/nudix family	HMPREF0541_00893	hydrolase, NUDIX family	LRHK_210	NUDIX domain-containing protein	LRHM_0207	putative hydrolase	E800_762	Nudix dNTPase DR1776	LRH_09485	NUDIX family hydrolase	HMPREF0539_0151	NUDIX family hydrolase	LRHMDP2_206	Nudix dNTPase DR1776	LRHMDP3_379	Nudix dNTPase DR1776	LC705_00201	MutT/nudix family phosphohydrolase	PEL5_1317	Nudix dNTPase DR1776	PEL6_366	Nudix dNTPase DR1776	R0011_07522	MutT/nudix family phosphohydrolase
LGG_00208	hypothetical protein	HMPREF0541_00892	hypothetical protein	LRHK_211	hypothetical protein	LRHM_0208	hypothetical protein	E800_761	FIG00748281: hypothetical protein	LRH_12269	hypothetical protein	HMPREF0539_0150	conserved hypothetical protein	LRHMDP2_205	FIG00748281: hypothetical protein	LRHMDP3_380	FIG00748281: hypothetical protein	LC705_00202	hypothetical protein	PEL5_1316	FIG00748281: hypothetical protein	PEL6_365	FIG00748281: hypothetical protein	R0011_07527	hypothetical protein
LGG_00209	ABC transporter ATPase/permease					LRHM_0209	multidrug ABC transporter ATP-binding and permease components	E800_760	FIG00748380: hypothetical protein	LRH_12274	ABC-type multidrug transport system, ATPase and permease component			LRHMDP2_204	FIG00748380: hypothetical protein	LRHMDP3_381	FIG00748380: hypothetical protein			PEL5_1315	FIG00748380: hypothetical protein	PEL6_364	FIG00748380: hypothetical protein
LGG_00210	XRE family transcriptional regulator					LRHM_0210	transcriptional regulator	E800_759	Positive transcriptional regulator, MutR family	LRH_12279	Transcriptional regulator, xre family protein			LRHMDP2_203	Positive transcriptional regulator, MutR family	LRHMDP3_382	Positive transcriptional regulator, MutR family			PEL5_1314	Positive transcriptional regulator, MutR family	PEL6_363	Positive transcriptional regulator, MutR family
LGG_00211	FAD(NAD)-dependent oxidoreductase	HMPREF0541_00891	hypothetical protein	LRHK_212	putative FAD(NAD)-dependent oxidoreductase	LRHM_0211	putative oxidoreductase	E800_758	Nitrogen regulatory protein P-II	LRH_12284	Predicted FAD(NAD)-dependent oxidoreductase	HMPREF0539_0149	possible FAD(NAD)-dependent oxidoreductase	LRHMDP2_202	Nitrogen regulatory protein P-II	LRHMDP3_383	Nitrogen regulatory protein P-II	LC705_00203	FAD(NAD)-dependent oxidoreductase	PEL5_1313	Nitrogen regulatory protein P-II	PEL6_362	Nitrogen regulatory protein P-II	R0011_07532	FAD(NAD)-dependent oxidoreductase
LGG_00212	NADH oxidase	HMPREF0541_00890	putative NADH oxidase	LRHK_213	NADH oxidase	LRHM_0212	NADH oxidoreductase	E800_757	NADH peroxidase Npx	LRH_12289	Uncharacterized NAD(FAD)-dependent dehydrogenase	HMPREF0539_0148	NADH dehydrogenase	LRHMDP2_201	NADH peroxidase Npx	LRHMDP3_384	NADH peroxidase Npx	LC705_00204	NADH oxidase	PEL5_1312	NADH peroxidase Npx	PEL6_361	NADH peroxidase Npx	R0011_07537	NADH oxidase
LGG_00213	hypothetical protein	HMPREF0541_00889	hypothetical protein	LRHK_215	hypothetical protein	LRHM_0213	hypothetical protein	E800_756	FIG00742522: hypothetical protein	LRH_12294	hypothetical protein	HMPREF0539_0147	conserved hypothetical protein	LRHMDP2_200	FIG00742522: hypothetical protein	LRHMDP3_385	FIG00742522: hypothetical protein	LC705_00205	hypothetical protein	PEL5_1311	FIG00742522: hypothetical protein	PEL6_360	FIG00742522: hypothetical protein	R0011_07542	hypothetical protein
LGG_00214	hypothetical protein			LRHK_609	hypothetical protein							HMPREF0539_0725	hypothetical protein					LC705_02596	hypothetical protein
LGG_00215	methanol dehydrogenase-like protein	HMPREF0541_00887	hypothetical protein	LRHK_216	hypothetical protein	LRHM_0214	hypothetical protein	E800_755	Beta-propeller domains of methanol dehydrogenase type	LRH_12299	Beta-propeller domains of methanol dehydrogenase type	HMPREF0539_0145	beta-propeller domains of methanol dehydrogenase	LRHMDP2_199	Beta-propeller domains of methanol dehydrogenase type	LRHMDP3_386	Beta-propeller domains of methanol dehydrogenase type	LC705_00207	methanol dehydrogenase-like protein	PEL5_1310	Beta-propeller domains of methanol dehydrogenase type	PEL6_359	Beta-propeller domains of methanol dehydrogenase type	R0011_07547	methanol dehydrogenase-like protein
LGG_00216	permease	HMPREF0541_00886	hypothetical protein	LRHK_217	sulfite exporter TauE/SafE family protein	LRHM_0215	putative transporter protein	E800_754	membrane protein	LRH_12304	Predicted permease	HMPREF0539_0144	possible permease	LRHMDP2_198	membrane protein	LRHMDP3_387	membrane protein	LC705_00208	permease	PEL5_1309	membrane protein	PEL6_358	membrane protein	R0011_07552	permease
LGG_00217	membrane protein	HMPREF0541_00885	hypothetical protein	LRHK_218	hypothetical protein	LRHM_0216	hypothetical protein	E800_753	FIG00746577: hypothetical protein	LRH_12309	Predicted membrane protein	HMPREF0539_0143	membrane protein	LRHMDP2_197	FIG00746577: hypothetical protein	LRHMDP3_388	FIG00746577: hypothetical protein	LC705_00209	membrane protein	PEL5_1308	FIG00746577: hypothetical protein	PEL6_357	FIG00746577: hypothetical protein	R0011_07557	membrane protein
LGG_00218	hypothetical protein	HMPREF0541_00883	hypothetical protein	LRHK_219	hypothetical protein	LRHM_0217	hypothetical protein	E800_752	FIG00751441: hypothetical protein	LRH_12314	hypothetical protein	HMPREF0539_0142	conserved hypothetical protein	LRHMDP2_716	FIG00751441: hypothetical protein	LRHMDP3_389	FIG00751441: hypothetical protein	LC705_00210	hypothetical protein	PEL5_309	FIG00751441: hypothetical protein	PEL6_356	FIG00751441: hypothetical protein	R0011_07562	hypothetical protein
LGG_00219	hypothetical protein	HMPREF0541_00882	hypothetical protein	LRHK_220	membrane protein	LRHM_0218	hypothetical protein	E800_751	hypothetical protein	LRH_12319	Membrane protein	HMPREF0539_0141	membrane protein	LRHMDP2_715	Membrane protein	LRHMDP3_390	Membrane protein	LC705_00211	hypothetical protein	PEL5_308	hypothetical protein	PEL6_355	hypothetical protein	R0011_07567	hypothetical protein
LGG_00220	hypothetical protein	HMPREF0541_00881	hypothetical protein	LRHK_221	hypothetical protein	LRHM_0219	hypothetical protein	E800_750	FIG00749401: hypothetical protein	LRH_12324	hypothetical protein	HMPREF0539_0140	conserved hypothetical protein	LRHMDP2_714	FIG00749401: hypothetical protein	LRHMDP3_391	FIG00749401: hypothetical protein	LC705_00212	hypothetical protein	PEL5_307	FIG00749401: hypothetical protein	PEL6_354	FIG00749401: hypothetical protein	R0011_07572	hypothetical protein
LGG_00221	flavodoxin	HMPREF0541_00880	flavodoxin	LRHK_222	flavodoxin family protein	LRHM_0220	flavodoxin	E800_749	Flavodoxin	LRH_12329	Flavodoxin	HMPREF0539_0139	probable flavodoxin	LRHMDP2_713	Flavodoxin	LRHMDP3_392	Flavodoxin	LC705_00213	Flavodoxin	PEL5_306	Flavodoxin	PEL6_353	Flavodoxin	R0011_07577	Flavodoxin
LGG_00222	hypothetical protein	HMPREF0541_00879	hypothetical protein	LRHK_223	hypothetical protein	LRHM_0221	hypothetical protein	E800_748	FIG00744910: hypothetical protein	LRH_12334	hypothetical protein	HMPREF0539_0138	conserved hypothetical protein	LRHMDP2_712	FIG00744910: hypothetical protein	LRHMDP3_393	FIG00744910: hypothetical protein	LC705_00214	hypothetical protein	PEL5_305	FIG00744910: hypothetical protein	PEL6_352	FIG00744910: hypothetical protein	R0011_07582	hypothetical protein
LGG_00223	hypothetical protein	HMPREF0541_00878	hypothetical protein	LRHK_224	hypothetical protein	LRHM_0222	hypothetical protein	E800_747	hypothetical protein	LRH_12339	hypothetical protein	HMPREF0539_0137	conserved hypothetical protein	LRHMDP2_711	hypothetical protein	LRHMDP3_394	hypothetical protein	LC705_00215	hypothetical protein	PEL5_304	hypothetical protein	PEL6_351	hypothetical protein	R0011_07587	hypothetical protein
LGG_00224	hypothetical protein			LRHK_226	hypothetical protein			E800_746	FIG00745907: hypothetical protein			HMPREF0539_0136	hypothetical protein	LRHMDP2_710	FIG00745907: hypothetical protein	LRHMDP3_395	FIG00745907: hypothetical protein	LC705_00216	hypothetical protein	PEL5_303	FIG00745907: hypothetical protein	PEL6_350	FIG00745907: hypothetical protein
LGG_00225	2-hydroxyacid dehydrogenase	HMPREF0541_00877	putative glyoxylate reductase	LRHK_225	D-isomer specific 2-hydroxyacid dehydrogenase, NAD binding domain protein	LRHM_0223	putative dehydrogenase	E800_745	Glyoxylate reductase / Glyoxylate reductase / Hydroxypyruvate reductase	LRH_12349	Lactate dehydrogenase related enzyme	HMPREF0539_0135	possible glyoxylate reductase	LRHMDP2_709	Glyoxylate reductase / Glyoxylate reductase / Hydroxypyruvate reductase	LRHMDP3_396	Glyoxylate reductase / Glyoxylate reductase / Hydroxypyruvate reductase	LC705_00217	2-hydroxyacid dehydrogenase	PEL5_302	Glyoxylate reductase / Glyoxylate reductase / Hydroxypyruvate reductase	PEL6_349	Glyoxylate reductase / Glyoxylate reductase / Hydroxypyruvate reductase	R0011_07592	2-hydroxyacid dehydrogenase
LGG_00226	pyridoxine 5'-phosphate oxidase V-like favin-nucleotide-binding protein	HMPREF0541_00876	pyridoxamine 5'-phosphate oxidase family protein	LRHK_227	pyridoxamine 5'-phosphate oxidase family protein	LRHM_0224	favin-nucleotide-binding protein	E800_744	Pyridoxine 5'-phosphate oxidase V related favin-nucleotide-binding protein	LRH_12354	Pyridoxine 5'-phosphate oxidase V related favin-nucleotide-binding protein	HMPREF0539_0134	flavin-nucleotide-binding protein structurally involved in to pyridoxine 5'-phosphate oxidase	LRHMDP2_708	Pyridoxine 5'-phosphate oxidase V related favin-nucleotide-binding protein	LRHMDP3_397	Pyridoxine 5'-phosphate oxidase V related favin-nucleotide-binding protein	LC705_00219	pyridoxine 5'-phosphate oxidase V-like favin-nucleotide-binding protein	PEL5_301	Pyridoxine 5'-phosphate oxidase V related favin-nucleotide-binding protein	PEL6_348	Pyridoxine 5'-phosphate oxidase V related favin-nucleotide-binding protein	R0011_07597	pyridoxine 5'-phosphate oxidase V-like favin-nucleotide-binding protein
LGG_00227	membrane protein	HMPREF0541_00875	transglycosylase associated protein	LRHK_228	transglycosylase associated family protein	LRHM_0225	hypothetical protein	E800_743	FIG00742293: hypothetical protein	LRH_12359	Predicted membrane protein	HMPREF0539_0133	membrane protein	LRHMDP2_707	FIG00742293: hypothetical protein	LRHMDP3_398	FIG00742293: hypothetical protein	LC705_00220	membrane protein	PEL5_300	FIG00742293: hypothetical protein	PEL6_347	FIG00742293: hypothetical protein	R0011_07602	membrane protein
LGG_00228	hypothetical protein	HMPREF0541_00874	hypothetical protein	LRHK_229	hypothetical protein	LRHM_0226	hypothetical protein	E800_742	FIG00747117: hypothetical protein	LRH_12364	hypothetical protein	HMPREF0539_0132	conserved hypothetical protein	LRHMDP2_706	FIG00747117: hypothetical protein	LRHMDP3_399	FIG00747117: hypothetical protein	LC705_00221	hypothetical protein	PEL5_299	FIG00747117: hypothetical protein	PEL6_346	FIG00747117: hypothetical protein	R0011_07607	hypothetical protein
LGG_00229	hypothetical protein	HMPREF0541_00873	hypothetical protein	LRHK_230	hypothetical protein	LRHM_0227	hypothetical protein	E800_741	FIG00745441: hypothetical protein	LRH_12369	hypothetical protein	HMPREF0539_0131	conserved hypothetical protein	LRHMDP2_705	FIG00745441: hypothetical protein	LRHMDP3_400	FIG00745441: hypothetical protein	LC705_00222	hypothetical protein	PEL5_298	FIG00745441: hypothetical protein	PEL6_345	FIG00745441: hypothetical protein	R0011_07612	hypothetical protein
LGG_00230	alkaline shock protein	HMPREF0541_00872	alkaline shock protein 23 family protein	LRHK_231	hypothetical protein	LRHM_0228	hypothetical protein	E800_740	alkaline shock protein 23	LRH_12374	hypothetical protein	HMPREF0539_0130	probable general stress protein	LRHMDP2_704	alkaline shock protein 23	LRHMDP3_401	alkaline shock protein 23	LC705_00223	alkaline shock protein	PEL5_297	alkaline shock protein 23	PEL6_344	alkaline shock protein 23	R0011_07617	alkaline shock protein
LGG_00231	alkaline shock protein	HMPREF0541_00871	alkaline shock protein 23 family protein	LRHK_232	hypothetical protein	LRHM_0229	hypothetical protein	E800_739	alkaline shock protein 23	LRH_12379	hypothetical protein	HMPREF0539_0129	general stress protein Gls20	LRHMDP2_703	alkaline shock protein 23	LRHMDP3_402	alkaline shock protein 23	LC705_00224	alkaline shock protein	PEL5_296	alkaline shock protein 23	PEL6_343	alkaline shock protein 23	R0011_07622	alkaline shock protein
LGG_00232	hydrolase of the HAD superfamily	HMPREF0541_00870	putative haloacid dehalogenase, type II	LRHK_233	HAD hydrolase family protein	LRHM_0230	putative hydrolase	E800_738	2-haloacid dehalogenase (putative)	LRH_12384	HAD superfamily hydrolase	HMPREF0539_0128	haloacid dehalogenase family hydrolase	LRHMDP2_702	2-haloacid dehalogenase (putative)	LRHMDP3_403	2-haloacid dehalogenase (putative)	LC705_00225	HAD superfamily hydrolase	PEL5_295	2-haloacid dehalogenase (putative)	PEL6_342	2-haloacid dehalogenase (putative)	R0011_07627	hydrolase of the HAD superfamily protein
LGG_00233	membrane protein	HMPREF0541_00869	hypothetical protein	LRHK_234	hypothetical protein	LRHM_0231	hypothetical protein	E800_737	FIG00742511: hypothetical protein	LRH_12389	Predicted membrane protein	HMPREF0539_0127	permease	LRHMDP2_701	FIG00742511: hypothetical protein	LRHMDP3_404	FIG00742511: hypothetical protein	LC705_00226	membrane protein	PEL5_294	FIG00742511: hypothetical protein	PEL6_341	FIG00742511: hypothetical protein	R0011_07632	membrane protein
LGG_00234	hypothetical protein	HMPREF0541_00868	hypothetical protein	LRHK_235	hypothetical protein	LRHM_0232	hypothetical protein	E800_736	Predicted membrane protein	LRH_12394	Predicted membrane protein	HMPREF0539_0126	permease	LRHMDP2_700	Predicted membrane protein	LRHMDP3_405	Predicted membrane protein	LC705_00227	hypothetical protein					R0011_07637	hypothetical protein
LGG_00235	transposase					LRHM_0559	putative transposase													PEL5_2303	predicted ORF	PEL6_2174	predicted ORF
LGG_00236	transposase IS4 family protein					LRHM_0560	putative transposase					HMPREF0539_3099	transposase							PEL5_2302	Mobile element protein	PEL6_2173	Mobile element protein
LGG_00237	hypothetical protein																			PEL5_293	Predicted membrane protein	PEL6_862	Predicted membrane protein
LGG_00238	pyrrolidone-carboxylate peptidase	HMPREF0541_00867	pyroglutamyl-peptidase I	LRHK_236	pyroglutamyl-peptidase I	LRHM_0233	pyrrolidone-carboxylate peptidase	E800_735	Pyrrolidone-carboxylate peptidase	LRH_12399	pyrrolidone-carboxylate peptidase	HMPREF0539_0125	pyroglutamyl-peptidase I	LRHMDP2_699	Pyrrolidone-carboxylate peptidase	LRHMDP3_406	Pyrrolidone-carboxylate peptidase	LC705_00228	pyrrolidone-carboxylate peptidase	PEL5_292	Pyrrolidone-carboxylate peptidase	PEL6_861	Pyrrolidone-carboxylate peptidase	R0011_07642	pyrrolidone-carboxylate peptidase
LGG_00239	NADP oxidoreductase coenzyme F420-dependent	HMPREF0541_00866	NADP oxidoreductase coenzyme F420-dependent	LRHK_237	NAD-dependent glycerol-3-phosphate dehydrogenase family protein	LRHM_0234	putative dinucleotide-binding protein	E800_734	Predicted dinucleotide-binding enzyme	LRH_12404	Predicted dinucleotide-binding enzyme	HMPREF0539_0124	NADP oxidoreductase coenzyme F420-dependent	LRHMDP2_698	Predicted dinucleotide-binding enzyme	LRHMDP3_407	Predicted dinucleotide-binding enzyme	LC705_00229	NADP oxidoreductase coenzyme F420-dependent	PEL5_291	Predicted dinucleotide-binding enzyme	PEL6_860	Predicted dinucleotide-binding enzyme	R0011_07647	NADP oxidoreductase coenzyme F420-dependent
LGG_00240	glutamine amidotransferase	HMPREF0541_00864	CobB/CobQ-like protein	LRHK_239	cobB/CobQ-like glutamine amidotransferase domain protein	LRHM_0236	putative glutamine amidotransferase	E800_732	Putative amidotransferase similar to cobyric acid synthase	LRH_12414	Predicted glutamine amidotransferase	HMPREF0539_0122	adenosylcobyric acid synthase	LRHMDP2_696	Putative amidotransferase similar to cobyric acid synthase	LRHMDP3_409	Putative amidotransferase similar to cobyric acid synthase	LC705_00231	glutamine amidotransferase	PEL5_289	Putative amidotransferase similar to cobyric acid synthase	PEL6_858	Putative amidotransferase similar to cobyric acid synthase	R0011_07657	glutamine amidotransferase
LGG_00241	hypothetical protein	HMPREF0541_00863	hypothetical protein	LRHK_240	hypothetical protein	LRHM_0237	hypothetical protein	E800_731	FIG00742087: hypothetical protein	LRH_12419	hypothetical protein	HMPREF0539_0121	conserved hypothetical protein	LRHMDP2_695	FIG00742087: hypothetical protein	LRHMDP3_410	FIG00742087: hypothetical protein	LC705_00232	hypothetical protein	PEL5_288	FIG00742087: hypothetical protein	PEL6_857	FIG00742087: hypothetical protein	R0011_07662	hypothetical protein
LGG_00242	16S rRNA methyltransferase GidB	HMPREF0541_00862	16S rRNA methyltransferase GidB	LRHK_242	16S rRNA (guanine(527)-N(7))-methyltransferase GidB	LRHM_0238	methyltransferase GidB	E800_730	rRNA small subunit methyltransferase, glucose inhibited division protein GidB	LRH_12424	Cell division SAM-dependent methyltransferase	HMPREF0539_0120	glucose-inhibited division protein B	LRHMDP2_692	rRNA small subunit methyltransferase, glucose inhibited division protein GidB	LRHMDP3_413	rRNA small subunit methyltransferase, glucose inhibited division protein GidB	LC705_00233	16S rRNA methyltransferase GidB	PEL5_286	rRNA small subunit methyltransferase, glucose inhibited division protein GidB	PEL6_855	rRNA small subunit methyltransferase, glucose inhibited division protein GidB	R0011_07667	16S rRNA methyltransferase GidB
LGG_00243	nucleoid occlusion protein	HMPREF0541_00861	nucleoid occlusion protein	LRHK_243	nucleoid occlusion protein	LRHM_0239	chromosome partitioning protein ParB	E800_729	Chromosome (plasmid) partitioning protein ParB / Stage 0 sporulation protein J	LRH_12429	Spo0J-like protein, ParB-like nuclease domain	HMPREF0539_0119	stage 0 DNA-binding protein	LRHMDP2_691	Chromosome (plasmid) partitioning protein ParB / Stage 0 sporulation protein J	LRHMDP3_414	Chromosome (plasmid) partitioning protein ParB / Stage 0 sporulation protein J	LC705_00234	nucleoid occlusion protein	PEL5_285	Chromosome (plasmid) partitioning protein ParB / Stage 0 sporulation protein J	PEL6_854	Chromosome (plasmid) partitioning protein ParB / Stage 0 sporulation protein J	R0011_07672	nucleoid occlusion protein
LGG_00244	chromosome partitioning protein ParA	HMPREF0541_00860	sporulation initiation inhibitor protein Soj	LRHK_244	sporulation initiation inhibitor protein soj	LRHM_0240	chromosome partitioning protein ParA	E800_728	Chromosome (plasmid) partitioning protein ParA / Sporulation initiation inhibitor protein Soj	LRH_12434	Chromosome partitioning ATPase	HMPREF0539_0118	chromosome partitioning ATPase	LRHMDP2_690	Chromosome (plasmid) partitioning protein ParA / Sporulation initiation inhibitor protein Soj	LRHMDP3_415	Chromosome (plasmid) partitioning protein ParA / Sporulation initiation inhibitor protein Soj	LC705_00235	chromosome partitioning protein ParA	PEL5_284	Chromosome (plasmid) partitioning protein ParA / Sporulation initiation inhibitor protein Soj	PEL6_853	Chromosome (plasmid) partitioning protein ParA / Sporulation initiation inhibitor protein Soj	R0011_07677	chromosome partitioning ATPase
LGG_00245	ParB-like partition protein	HMPREF0541_00859	stage 0 sporulation protein J	LRHK_245	stage 0 sporulation protein J	LRHM_0241	chromosome partitioning protein ParB	E800_727	Chromosome (plasmid) partitioning protein ParB / Stage 0 sporulation protein J	LRH_12439	Spo0J-like protein, ParB-like nuclease domain	HMPREF0539_0117	chromosome partitioning protein, DNA-binding exonuclease	LRHMDP2_689	Chromosome (plasmid) partitioning protein ParB / Stage 0 sporulation protein J	LRHMDP3_416	Chromosome (plasmid) partitioning protein ParB / Stage 0 sporulation protein J	LC705_00236	ParB-like partition protein	PEL5_283	Chromosome (plasmid) partitioning protein ParB / Stage 0 sporulation protein J	PEL6_852	Chromosome (plasmid) partitioning protein ParB / Stage 0 sporulation protein J	R0011_07682	ParB-like partition protein
LGG_00246	hypothetical protein	HMPREF0541_00858	hypothetical protein	LRHK_246	hypothetical protein	LRHM_0242	hypothetical protein	E800_726	FIG00745276: hypothetical protein	LRH_12444	hypothetical protein	HMPREF0539_0116	protein of hypothetical function DUF951	LRHMDP2_688	FIG00745276: hypothetical protein	LRHMDP3_417	FIG00745276: hypothetical protein	LC705_00237	hypothetical protein	PEL5_282	FIG00745276: hypothetical protein	PEL6_851	FIG00745276: hypothetical protein	R0011_07687	hypothetical protein
LGG_00247	GTP-dependent nucleic acid-binding protein EngD	HMPREF0541_00857	GTP-binding protein YchF	LRHK_247	GTPase	LRHM_0243	translation-associated GTPase	E800_725	GTP-binding and nucleic acid-binding protein YchF	LRH_12449	translation-associated GTPase	HMPREF0539_0115	GTP-binding translation factor YchF	LRHMDP2_687	GTP-binding and nucleic acid-binding protein YchF	LRHMDP3_418	GTP-binding and nucleic acid-binding protein YchF	LC705_00238	GTP-dependent nucleic acid-binding protein EngD	PEL5_281	GTP-binding and nucleic acid-binding protein YchF	PEL6_850	GTP-binding and nucleic acid-binding protein YchF	R0011_07692	GTP-binding protein YchF
LGG_00248	membrane protein	HMPREF0541_00856	hypothetical protein	LRHK_248	hypothetical protein	LRHM_0244	hypothetical protein	E800_724	Uncharacterized membrane-bound protein conserved in bacteria	LRH_12454	Uncharacterized membrane-bound protein conserved in bacteria	HMPREF0539_0114	possible bacterial membrane-bound protein	LRHMDP2_686	Uncharacterized membrane-bound protein conserved in bacteria	LRHMDP3_419	Uncharacterized membrane-bound protein conserved in bacteria	LC705_00239	membrane protein	PEL5_280	Uncharacterized membrane-bound protein conserved in bacteria	PEL6_849	Uncharacterized membrane-bound protein conserved in bacteria	R0011_07697	membrane protein
LGG_00249	inosine-5'-monophosphate dehydrogenase	HMPREF0541_00855	inosine-5'-monophosphate dehydrogenase	LRHK_249	inosine-5'-monophosphate dehydrogenase	LRHM_0245	inosine-5'-monophosphate dehydrogenase	E800_723	Inosine-5'-monophosphate dehydrogenase	LRH_12459	IMP dehydrogenase/GMP reductase	HMPREF0539_0113	IMP dehydrogenase	LRHMDP2_685	Inosine-5'-monophosphate dehydrogenase	LRHMDP3_420	Inosine-5'-monophosphate dehydrogenase	LC705_00240	inosine-5'-monophosphate dehydrogenase	PEL5_279	Inosine-5'-monophosphate dehydrogenase	PEL6_848	Inosine-5'-monophosphate dehydrogenase	R0011_07702	inosine-5'-monophosphate dehydrogenase
LGG_00250	hypothetical protein	HMPREF0541_03031	hypothetical protein	LRHK_250	hypothetical protein	LRHM_0246	hypothetical protein	E800_1647	Alpha-galactosidase					LRHMDP2_2113	acetyltransferase, GNAT family	LRHMDP3_2299	acetyltransferase, GNAT family	LC705_00241	hypothetical protein	PEL5_278	Alpha-galactosidase	PEL6_847	Alpha-galactosidase	R0011_09168	hypothetical protein
LGG_00251	hypothetical protein	HMPREF0541_00852	hypothetical protein	LRHK_251	hypothetical protein	LRHM_0247	hypothetical protein	E800_721	FIG00745129: hypothetical protein	LRH_12464	hypothetical protein	HMPREF0539_0112	conserved hypothetical protein	LRHMDP2_683	FIG00745129: hypothetical protein	LRHMDP3_422	FIG00745129: hypothetical protein	LC705_00242	hypothetical protein	PEL5_277	FIG00745129: hypothetical protein	PEL6_846	FIG00745129: hypothetical protein	R0011_07707	hypothetical protein
LGG_00252	two-component response regulator	HMPREF0541_00851	response regulator receiver domain protein	LRHK_252	transcriptional regulatory, C terminal family protein	LRHM_0248	two-component response regulator	E800_720	DNA-binding response regulator, OmpR family	LRH_12469	DNA-binding response regulator, OmpR family (Rec-wHTH domains)	HMPREF0539_0111	response regulator	LRHMDP2_682	DNA-binding response regulator, OmpR family	LRHMDP3_423	DNA-binding response regulator, OmpR family	LC705_00243	two-component response regulator	PEL5_276	DNA-binding response regulator, OmpR family	PEL6_845	DNA-binding response regulator, OmpR family	R0011_07712	two-component response regulator
LGG_00253	two component sensor transduction histidine kinase	HMPREF0541_00850	ATPase/histidine kinase/DNA gyrase B/HSP90 domain protein	LRHK_253	histidine kinase-, DNA gyrase B-, and HSP90-like ATPase family protein	LRHM_0249	two-component sensor kinase	E800_719	Osmosensitive K+ channel histidine kinase KdpD	LRH_12474	Signal transduction histidine kinase	HMPREF0539_0110	sensor histidine kinase	LRHMDP2_681	Osmosensitive K+ channel histidine kinase KdpD	LRHMDP3_424	Osmosensitive K+ channel histidine kinase KdpD	LC705_00244	two component sensor transduction histidine kinase	PEL5_275	Osmosensitive K+ channel histidine kinase KdpD	PEL6_844	Osmosensitive K+ channel histidine kinase KdpD	R0011_07717	two component sensor transduction histidine kinase
LGG_00254	D-alanyl-D-alanine carboxypeptidase	HMPREF0541_00849	serine-type D-Ala-D-Ala carboxypeptidase	LRHK_255	D-alanyl-D-alanine carboxypeptidase dacA	LRHM_0250	D-alanyl-D-alanine carboxypeptidase	E800_718	D-alanyl-D-alanine carboxypeptidase	LRH_12479	D-alanyl-D-alanine carboxypeptidase	HMPREF0539_0109	serine family D-Ala-D-Ala carboxypeptidase	LRHMDP2_680	D-alanyl-D-alanine carboxypeptidase	LRHMDP3_425	D-alanyl-D-alanine carboxypeptidase	LC705_00245	D-alanyl-D-alanine carboxypeptidase	PEL5_274	D-alanyl-D-alanine carboxypeptidase	PEL6_843	D-alanyl-D-alanine carboxypeptidase	R0011_07722	D-alanyl-D-alanine carboxypeptidase
LGG_00255	hypothetical protein			LRHK_2413	hypothetical protein	LRHM_0251	hypothetical protein	E800_717	ATP-dependent nuclease, subunit B							LRHMDP3_426	ATP-dependent nuclease, subunit B	LC705_02400	hypothetical protein	PEL5_273	ATP-dependent nuclease, subunit B	PEL6_842	ATP-dependent nuclease, subunit B
LGG_00256	transcription elongation factor GreA	HMPREF0541_00846	transcription elongation factor GreA	LRHK_257	transcription elongation factor, GreA/GreB, C-term family protein	LRHM_0252	transcription elongation factor GreA	E800_715	Transcription elongation factor GreA	LRH_12484	transcription elongation factor GreA	HMPREF0539_0106	transcription elongation factor GreA	LRHMDP2_678	Transcription elongation factor GreA	LRHMDP3_696	Transcription elongation factor GreA	LC705_00247	transcription elongation factor GreA	PEL5_271	Transcription elongation factor GreA	PEL6_840	Transcription elongation factor GreA	R0011_07727	transcription elongation factor GreA
LGG_00257	UDP-N-acetylmuramoylalanyl-D-glutamate--2, 6-diaminopimelate ligase	HMPREF0541_00845	UDP-N-acetylmuramoyl-L-alanyl-D-glutamate--2, 6-diaminopimelate ligase	LRHK_258	UDP-N-acetylmuramyl-tripeptide synthetase family protein	LRHM_0253	UDP-N-acetylmuramoylalanyl-D-glutamate--2, 6-diaminopimelate ligase	E800_714	UDP-N-acetylmuramoylalanyl-D-glutamate--L- lysine ligase	LRH_12489	UDP-N-acetylmuramoylalanyl-D-glutamate--2, 6-diaminopimelate ligase	HMPREF0539_0105	UDP-N-acetylmuramoyl-L-alanyl-D-glutamate--L- lysine ligase	LRHMDP2_677	UDP-N-acetylmuramoylalanyl-D-glutamate--L- lysine ligase	LRHMDP3_695	UDP-N-acetylmuramoylalanyl-D-glutamate--L- lysine ligase	LC705_00248	UDP-N-acetylmuramoylalanyl-D-glutamate--2, 6-diaminopimelate ligase	PEL5_270	UDP-N-acetylmuramoylalanyl-D-glutamate--L- lysine ligase	PEL6_839	UDP-N-acetylmuramoylalanyl-D-glutamate--L- lysine ligase	R0011_07732	UDP-N-acetylmuramoylalanyl-D-glutamate--2, 6-diaminopimelate ligase
LGG_00258	aspartate racemase	HMPREF0541_00844	aspartate racemase	LRHK_259	aspartate racemase	LRHM_0254	aspartate racemase	E800_713	Aspartate racemase	LRH_12494	Aspartate racemase	HMPREF0539_0104	aspartate racemase	LRHMDP2_676	Aspartate racemase	LRHMDP3_694	Aspartate racemase	LC705_00249	aspartate racemase	PEL5_269	Aspartate racemase	PEL6_838	Aspartate racemase	R0011_07737	aspartate racemase
LGG_00259	aldo/keto reductase family oxidoreductase	HMPREF0541_00843	glyoxal reductase	LRHK_260	aldo/keto reductase family protein	LRHM_0255	aldo/keto reductase	E800_712	oxidoreductase of aldo/keto reductase family, subgroup 1	LRH_12499	Aldo/keto reductase of diketogulonate reductase family protein	HMPREF0539_0103	2,5-didehydrogluconate reductase	LRHMDP2_675	oxidoreductase of aldo/keto reductase family, subgroup 1	LRHMDP3_693	oxidoreductase of aldo/keto reductase family, subgroup 1	LC705_00250	aldo/keto reductase family oxidoreductase	PEL5_268	oxidoreductase of aldo/keto reductase family, subgroup 1	PEL6_837	oxidoreductase of aldo/keto reductase family, subgroup 1	R0011_07742	aldo/keto reductase family oxidoreductase
LGG_00260	DeoR family transcriptional regulator	HMPREF0541_00842	putative HTH-type transcriptional regulator IolR	LRHK_261	DeoR family transcriptional regulator	LRHM_0256	putative transcriptional regulator	E800_711	Transcriptional repressor of the myo-inositol catabolic operon DeoR family	LRH_12504	transcriptional regulator, DeoR family protein	HMPREF0539_0102	DeoR family transcriptional regulator	LRHMDP2_674	Transcriptional repressor of the myo-inositol catabolic operon DeoR family	LRHMDP3_692	Transcriptional repressor of the myo-inositol catabolic operon DeoR family	LC705_00251	transcriptional regulator DeoR family	PEL5_267	Transcriptional repressor of the myo-inositol catabolic operon DeoR family	PEL6_836	Transcriptional repressor of the myo-inositol catabolic operon DeoR family	R0011_07747	DeoR family transcriptional regulator
LGG_00261	transporter major facilitator superfamily MFS_1, Myo-inositol transporter	HMPREF0541_00841	MFS transporter, SP family	LRHK_262	MFS transporter, sugar porter family protein	LRHM_0257	putative transporter protein	E800_710	Major myo-inositol transporter IolT	LRH_12509	D-xylose proton-symporter	HMPREF0539_0101	MFS family major facilitator transporter	LRHMDP2_673	Major myo-inositol transporter IolT	LRHMDP3_691	Major myo-inositol transporter IolT	LC705_00252	MFS superfamily Myo-inositol transporter	PEL5_266	Major myo-inositol transporter IolT	PEL6_835	Major myo-inositol transporter IolT	R0011_07752	MFS superfamily Myo-inositol transporter
LGG_00262	methylmalonate-semialdehyde dehydrogenase	HMPREF0541_00840	methylmalonate-semialdehyde dehydrogenase	LRHK_264	methylmalonate-semialdehyde dehydrogenase	LRHM_0258	putative dehydrogenase	E800_708	Methylmalonate-semialdehyde dehydrogenase [inositol]	LRH_12514	IolA	HMPREF0539_0100	methylmalonate-semialdehyde dehydrogenase (acylating)	LRHMDP2_1233	Methylmalonate-semialdehyde dehydrogenase [inositol]	LRHMDP3_689	Methylmalonate-semialdehyde dehydrogenase [inositol]	LC705_00253	methylmalonate-semialdehyde dehydrogenase	PEL5_264	Methylmalonate-semialdehyde dehydrogenase [inositol]	PEL6_833	Methylmalonate-semialdehyde dehydrogenase [inositol]	R0011_07757	methylmalonate-semialdehyde dehydrogenase
LGG_00263	myo-inositol catabolism IolB domain-containing protein	HMPREF0541_00839	5-deoxy-glucuronate isomerase	LRHK_265	5-deoxy-glucuronate isomerase	LRHM_0259	myo-inositol catabolism protein IolB	E800_707	5-deoxy-glucuronate isomerase	LRH_12519	hypothetical protein	HMPREF0539_0099	myo-inositol catabolism protein IolB	LRHMDP2_1234	5-deoxy-glucuronate isomerase	LRHMDP3_688	5-deoxy-glucuronate isomerase	LC705_00254	myo-inositol catabolism IolB domain-containing protein	PEL5_263	5-deoxy-glucuronate isomerase	PEL6_832	5-deoxy-glucuronate isomerase	R0011_07762	myo-inositol catabolism IolB domain-containing protein
LGG_00264	5-dehydro-2-deoxygluconokinase	HMPREF0541_00838	5-dehydro-2-deoxygluconokinase	LRHK_266	5-dehydro-2-deoxygluconokinase	LRHM_0260	myo-inositol catabolism protein IolC	E800_706	5-keto-2-deoxygluconokinase	LRH_12524	hypothetical protein	HMPREF0539_0098	5-dehydro-2-deoxygluconokinase	LRHMDP2_1235	5-keto-2-deoxygluconokinase	LRHMDP3_687	5-keto-2-deoxygluconokinase	LC705_00255	5-dehydro-2-deoxygluconokinase	PEL5_262	5-keto-2-deoxygluconokinase	PEL6_831	5-keto-2-deoxygluconokinase	R0011_07767	5-dehydro-2-deoxygluconokinase
LGG_00265	myo-inositol catabolism protein IolD	HMPREF0541_00837	3D-(3,5/4)-trihydroxycyclohexane-1,2-dione hydrolase	LRHK_267	3D-(3, 5/4)-trihydroxycyclohexane-1, 2-dione hydrolase	LRHM_0261	myo-inositol catabolism protein IolD	E800_705	Epi-inositol hydrolase	LRH_12529	hypothetical protein	HMPREF0539_0097	acetolactate synthase	LRHMDP2_1236	Epi-inositol hydrolase	LRHMDP3_686	Epi-inositol hydrolase	LC705_00256	myo-inositol catabolism protein IolD	PEL5_261	Epi-inositol hydrolase	PEL6_830	Epi-inositol hydrolase	R0011_07772	myo-inositol catabolism protein IolD
LGG_00266	myo-inositol 2-dehydrogenase	HMPREF0541_00836	putative inositol 2-dehydrogenase/D-chiro-inositol 3-dehydrogenase	LRHK_268	inositol 2-dehydrogenase/D-chiro-inositol 3-dehydrogenase	LRHM_0262	myo-inositol dehydrogenase	E800_704	Myo-inositol 2-dehydrogenase 1	LRH_12534	Idh	HMPREF0539_0096	inositol 2-dehydrogenase	LRHMDP2_1237	Myo-inositol 2-dehydrogenase 1	LRHMDP3_685	Myo-inositol 2-dehydrogenase 1	LC705_00257	myo-inositol 2-dehydrogenase	PEL5_260	Myo-inositol 2-dehydrogenase 1	PEL6_829	Myo-inositol 2-dehydrogenase 1	R0011_07777	myo-inositol 2-dehydrogenase
LGG_00267	myo-inositol 2-dehydrogenase	HMPREF0541_00835	oxidoreductase, NAD-binding domain protein	LRHK_269	myo-inositol 2-dehydrogenase	LRHM_0263	myo-inositol 2-dehydrogenase	E800_703	Myo-inositol 2-dehydrogenase	LRH_12539	myo-inositol 2-dehydrogenase	HMPREF0539_0095	possible inositol 2-dehydrogenase	LRHMDP2_1238	Myo-inositol 2-dehydrogenase	LRHMDP3_684	Myo-inositol 2-dehydrogenase	LC705_00258	myo-inositol 2-dehydrogenase	PEL5_259	Myo-inositol 2-dehydrogenase	PEL6_828	Myo-inositol 2-dehydrogenase	R0011_07782	myo-inositol 2-dehydrogenase
LGG_00268	myo-inosose dehydratase	HMPREF0541_00834	inosose dehydratase	LRHK_270	inosose dehydratase	LRHM_0264	myo-inositol catabolism protein	E800_702	Inosose dehydratase	LRH_12544	Xylose isomerase domain protein TIM barrel	HMPREF0539_0094	Myo-inosose-2 dehydratase	LRHMDP2_1239	Inosose dehydratase	LRHMDP3_683	Inosose dehydratase	LC705_00259	myo-inosose dehydratase	PEL5_258	Inosose dehydratase	PEL6_827	Inosose dehydratase	R0011_07787	Inosose dehydratase
LGG_00269	fructose-bisphosphate aldolase	HMPREF0541_00833	6-phospho-5-dehydro-2-deoxy-D-gluconate aldolase	LRHK_271	6-phospho-5-dehydro-2-deoxy-D-gluconate aldolase	LRHM_0265	fructose-1,6-bisphosphate aldolase	E800_701	Fructose-bisphosphate aldolase class II	LRH_12549	fructose-1,6-bisphosphate aldolase	HMPREF0539_0093	5-dehydro-2-deoxyphosphogluconate aldolase	LRHMDP2_1240	Fructose-bisphosphate aldolase class II	LRHMDP3_682	Fructose-bisphosphate aldolase class II	LC705_00260	fructose-bisphosphate aldolase	PEL5_257	Fructose-bisphosphate aldolase class II	PEL6_826	Fructose-bisphosphate aldolase class II	R0011_07792	fructose-bisphosphate aldolase
LGG_00270	4-oxalocrotonate tautomerase	HMPREF0541_00832	tautomerase enzyme	LRHK_272	malonate semialdehyde decarboxylase	LRHM_0266	malonate semialdehyde decarboxylase	E800_700	Probable tautomerase yrdN	LRH_12554	4-oxalocrotonate tautomerase	HMPREF0539_0092	4-oxalocrotonate tautomerase	LRHMDP2_1241	Probable tautomerase yrdN	LRHMDP3_681	Probable tautomerase yrdN	LC705_00261	4-oxalocrotonate tautomerase	PEL5_256	Probable tautomerase yrdN	PEL6_825	Probable tautomerase yrdN	R0011_07797	4-oxalocrotonate tautomerase
LGG_00271	xylose isomerase domain-containing protein	HMPREF0541_00831	AP endonuclease, family 2	LRHK_273	xylose isomerase-like TIM barrel family protein	LRHM_0267	hypothetical protein	E800_699	Inosose isomerase	LRH_12559	hypothetical protein	HMPREF0539_0091	xylose isomerase domain protein	LRHMDP2_1242	Inosose isomerase	LRHMDP3_680	Inosose isomerase	LC705_00262	xylose isomerase domain-containing protein TIM barrel	PEL5_255	Inosose isomerase	PEL6_824	Inosose isomerase	R0011_07802	xylose isomerase domain-containing protein
LGG_00272	IolH	HMPREF0541_00830	protein IolH	LRHK_274	xylose isomerase-like TIM barrel family protein	LRHM_0268	myo-inositol catabolism protein IolH	E800_698	Glyceraldehyde-3-phosphate ketol-isomerase	LRH_12564	IolH	HMPREF0539_0090	inositol utilization protein H	LRHMDP2_1243	Glyceraldehyde-3-phosphate ketol-isomerase	LRHMDP3_679	Glyceraldehyde-3-phosphate ketol-isomerase	LC705_00263	IolH	PEL5_254	Glyceraldehyde-3-phosphate ketol-isomerase	PEL6_823	Glyceraldehyde-3-phosphate ketol-isomerase	R0011_07807	IolH
LGG_00273	RpiR family transcriptional regulator	HMPREF0541_00829	transcriptional regulator, RpiR family	LRHK_275	helix-turn-helix domain, rpiR family protein	LRHM_0269	transcriptional regulator	E800_697	Transcriptional regulator	LRH_12569	Transcriptional regulator	HMPREF0539_0089	RpiR family transcriptional regulator	LRHMDP2_1244	Transcriptional regulator	LRHMDP3_678	Transcriptional regulator	LC705_00264	transcriptional regulator RpiR family	PEL5_253	Transcriptional regulator	PEL6_822	Transcriptional regulator	R0011_07812	transcriptional regulator RpiR family protein
LGG_00274	6-phosphogluconate dehydrogenase-like protein	HMPREF0541_00828	phosphogluconate dehydrogenase	LRHK_276	6-phosphogluconate dehydrogenase	LRHM_0270	6-phosphogluconate dehydrogenase	E800_696	6-phosphogluconate dehydrogenase, decarboxylating	LRH_12574	6-phosphogluconate dehydrogenase-like protein	HMPREF0539_0088	phosphogluconate dehydrogenase (decarboxylating)	LRHMDP2_1245	6-phosphogluconate dehydrogenase, decarboxylating	LRHMDP3_677	6-phosphogluconate dehydrogenase, decarboxylating	LC705_00265	6-phosphogluconate dehydrogenase-like protein	PEL5_252	6-phosphogluconate dehydrogenase, decarboxylating	PEL6_821	6-phosphogluconate dehydrogenase, decarboxylating	R0011_07817	6-phosphogluconate dehydrogenase-like protein
LGG_00275	gluconate kinase	HMPREF0541_00827	gluconokinase	LRHK_277	gluconate kinase	LRHM_0271	gluconate kinase	E800_694	Gluconokinase	LRH_12579	gluconate kinase	HMPREF0539_0087	gluconokinase	LRHMDP2_1246	Gluconokinase	LRHMDP3_675	Gluconokinase	LC705_00266	gluconate kinase	PEL5_250	Gluconokinase	PEL6_819	Gluconokinase	R0011_07822	gluconate kinase
LGG_00276	hypothetical protein	HMPREF0541_00826	hypothetical protein			LRHM_0272	hypothetical protein	E800_693	Alpha-galactosidase											PEL5_249	Alpha-galactosidase	PEL6_818	Alpha-galactosidase
LGG_00277	gluconate transporter	HMPREF0541_00824	gluconate permease	LRHK_278	high-affinity gluconate transporter	LRHM_0273	gluconate transporter protein	E800_692	Gluconate permease, Bsu4004 homolog	LRH_12584	H+/gluconate symporter related permease	HMPREF0539_0085	GntP family gluconate:proton (H+) symporter	LRHMDP2_1247	Gluconate permease, Bsu4004 homolog	LRHMDP3_674	Gluconate permease, Bsu4004 homolog	LC705_00268	gluconate transporter	PEL5_248	Gluconate permease, Bsu4004 homolog	PEL6_817	Gluconate permease, Bsu4004 homolog	R0011_07827	gluconate transporter
LGG_00278	hypothetical protein					LRHM_0274	hypothetical protein	E800_691	FIG00746410: hypothetical protein	LRH_12589	hypothetical protein									PEL5_247	FIG00746410: hypothetical protein	PEL6_816	FIG00746410: hypothetical protein
LGG_00279	dTDP-rhamnosyl transferase rfbF					LRHM_0275	putative glycosyltransferase	E800_690	Dolichol-phosphate mannosyltransferase in lipid-linked oligosaccharide synthesis cluster	LRH_12594	Predicted glycosyltransferse									PEL5_246	Dolichol-phosphate mannosyltransferase in lipid-linked oligosaccharide synthesis cluster	PEL6_815	Dolichol-phosphate mannosyltransferase in lipid-linked oligosaccharide synthesis cluster
LGG_00280	alpha-L-Rha alpha-1,3-L-rhamnosyltransferase					LRHM_0276	putative glycosyltransferase	E800_689	Alpha-L-Rha alpha-1,3-L-rhamnosyltransferase	LRH_12599	Glycosyltransferase related enzyme									PEL5_245	Alpha-L-Rha alpha-1,3-L-rhamnosyltransferase	PEL6_814	Alpha-L-Rha alpha-1,3-L-rhamnosyltransferase
LGG_00281	alpha-L-Rha alpha-1,3-L-rhamnosyltransferase	HMPREF0541_02537	glycosyltransferase, group 2 family protein			LRHM_0277	putative rhamnosyltransferase	E800_688	Alpha-L-Rha alpha-1,3-L-rhamnosyltransferase	LRH_12604	rhamnosyltransferase							LC705_02044	alpha-L-Rha alpha-1,3-L-rhamnosyltransferase	PEL5_244	Alpha-L-Rha alpha-1,3-L-rhamnosyltransferase	PEL6_813	Alpha-L-Rha alpha-1,3-L-rhamnosyltransferase	R0011_12083	alpha-L-Rha alpha-1,3-L-rhamnosyltransferase
LGG_00282	PST system family polysaccharide transporter					LRHM_0278	polysaccharide transporter protein	E800_687	Membrane protein involved in the export of O-antigen, teichoic acid lipoteichoic acids	LRH_12609	Polysaccharide Transporter, PST family protein									PEL5_243	Membrane protein involved in the export of O-antigen, teichoic acid lipoteichoic acids	PEL6_812	Membrane protein involved in the export of O-antigen, teichoic acid lipoteichoic acids
LGG_00283	hypothetical protein					LRHM_0279	hypothetical protein	E800_686	FIG00752194: hypothetical protein	LRH_12614	hypothetical protein									PEL5_242	FIG00752194: hypothetical protein	PEL6_811	FIG00752194: hypothetical protein
LGG_00284	hypothetical protein	HMPREF0541_00823	hypothetical protein	LRHK_279	hypothetical protein	LRHM_0280	hypothetical protein	E800_685	FIG00746862: hypothetical protein	LRH_12619	hypothetical protein	HMPREF0539_0084	conserved hypothetical protein	LRHMDP2_1248	FIG00746862: hypothetical protein	LRHMDP3_673	FIG00746862: hypothetical protein	LC705_00269	hypothetical protein	PEL5_241	FIG00746862: hypothetical protein	PEL6_810	FIG00746862: hypothetical protein	R0011_07832	hypothetical protein
LGG_00285	ABC transporter ATPase	HMPREF0541_00822	ABC transporter, ATP-binding protein	LRHK_280	ABC transporter family protein	LRHM_0281	Mn/Zn ABC transporter ATP-binding component	E800_684	Zinc ABC transporter, ATP-binding protein ZnuC	LRH_12624	ABC-type Mn/Zn transport system, ATPase component	HMPREF0539_0083	ABC superfamily ATP binding cassette transporter, ABC protein	LRHMDP2_1249	Zinc ABC transporter, ATP-binding protein ZnuC	LRHMDP3_672	Zinc ABC transporter, ATP-binding protein ZnuC	LC705_00270	ABC transporter ATPase	PEL5_240	Zinc ABC transporter, ATP-binding protein ZnuC	PEL6_809	Zinc ABC transporter, ATP-binding protein ZnuC	R0011_07837	ABC transporter ATPase
LGG_00286	Mn2/Zn2 ABC transporter permease	HMPREF0541_00821	ABC 3 transport family protein	LRHK_281	ABC 3 transport family protein	LRHM_0282	Mn/Zn ABC transporter permease component	E800_683	Zinc ABC transporter, inner membrane permease protein ZnuB	LRH_12629	ABC-type Mn2+/Zn2+ transport system, permease component	HMPREF0539_0082	ABC superfamily ATP binding cassette transporter, membrane protein	LRHMDP2_1250	Zinc ABC transporter, inner membrane permease protein ZnuB	LRHMDP3_671	Zinc ABC transporter, inner membrane permease protein ZnuB	LC705_00271	Mn2/Zn2 ABC transporter permease	PEL5_239	Zinc ABC transporter, inner membrane permease protein ZnuB	PEL6_808	Zinc ABC transporter, inner membrane permease protein ZnuB	R0011_07842	Mn2/Zn2 ABC transporter permease
LGG_00287	ser/Thr protein phosphatase family	HMPREF0541_00820	phosphodiesterase family protein	LRHK_282	calcineurin-like phosphoesterase family protein	LRHM_0283	putative serine-threonine protein phosphatase	E800_682	Diadenosine tetraphosphatase and related serine/threonine protein phosphatases	LRH_12634	Diadenosine tetraphosphatase related serine/threonine protein phosphatase	HMPREF0539_0081	metallophosphoesterase	LRHMDP2_1251	Diadenosine tetraphosphatase and related serine/threonine protein phosphatases	LRHMDP3_670	Diadenosine tetraphosphatase and related serine/threonine protein phosphatases	LC705_00272	ser/Thr protein phosphatase family	PEL5_238	Diadenosine tetraphosphatase and related serine/threonine protein phosphatases	PEL6_807	Diadenosine tetraphosphatase and related serine/threonine protein phosphatases	R0011_07847	ser/Thr protein phosphatase family
LGG_00288	3-hydroxyisobutyrate dehydrogenase	HMPREF0541_00819	phosphogluconate dehydrogenase, NAD binding domain protein	LRHK_283	NAD binding domain of 6-phosphogluconate dehydrogenase family protein	LRHM_0284	3-hydroxyisobutyrate dehydrogenase	E800_681	2-hydroxy-3-oxopropionate reductase	LRH_12639	3-hydroxyisobutyrate dehydrogenase related beta-hydroxyacid dehydrogenase	HMPREF0539_0080	possible 2-hydroxy-3-oxopropionate reductase	LRHMDP2_1252	2-hydroxy-3-oxopropionate reductase	LRHMDP3_669	2-hydroxy-3-oxopropionate reductase	LC705_00273	3-hydroxyisobutyrate dehydrogenase	PEL5_237	2-hydroxy-3-oxopropionate reductase	PEL6_806	2-hydroxy-3-oxopropionate reductase	R0011_07852	3-hydroxyisobutyrate dehydrogenase
LGG_00289	oligoendopeptidase F	HMPREF0541_00818	oligoendopeptidase F	LRHK_284	oligoendopeptidase F	LRHM_0285	oligoendopeptidase F	E800_680	Oligoendopeptidase F	LRH_12644	oligoendopeptidase F	HMPREF0539_0079	oligoendopeptidase F1	LRHMDP2_1253	Oligoendopeptidase F	LRHMDP3_668	Oligoendopeptidase F	LC705_00274	oligoendopeptidase F	PEL5_236	Oligoendopeptidase F	PEL6_805	Oligoendopeptidase F	R0011_07857	oligoendopeptidase F
LGG_00290	LytR family transcriptional regulator	HMPREF0541_00817	putative biofilm regulatory protein A	LRHK_285	cell envelope-related function transcriptional attenuator common domain-containing protein	LRHM_0286	transcriptional regulator	E800_679	Cell envelope-associated transcriptional attenuator LytR-CpsA-Psr, subfamily F2 (as in PMID19099556)	LRH_12649	Transcriptional regulator	HMPREF0539_0078	LytR family transcriptional regulator	LRHMDP2_1254	Cell envelope-associated transcriptional attenuator LytR-CpsA-Psr, subfamily F2 (as in PMID19099556)	LRHMDP3_667	Cell envelope-associated transcriptional attenuator LytR-CpsA-Psr, subfamily F2 (as in PMID19099556)	LC705_00275	LytR family transcriptional regulator	PEL5_235	Cell envelope-associated transcriptional attenuator LytR-CpsA-Psr, subfamily F2 (as in PMID19099556)	PEL6_804	Cell envelope-associated transcriptional attenuator LytR-CpsA-Psr, subfamily F2 (as in PMID19099556)	R0011_07862	LytR family transcriptional regulator
LGG_00291	hypothetical protein			LRHK_287	hypothetical protein			E800_678	hypothetical protein					LRHMDP2_1255	hypothetical protein	LRHMDP3_666	hypothetical protein	LC705_00276	hypothetical protein	PEL5_234	hypothetical protein	PEL6_803	hypothetical protein
LGG_00292	branched-chain amino acid transport protein	HMPREF0541_00816	branched-chain amino acid transport system II carrier protein	LRHK_286	branched-chain amino acid transport system II carrier protein	LRHM_0287	branched-chain amino acid transporter protein	E800_677	Branched-chain amino acid transport system carrier protein	LRH_12654	Branched-chain amino acid permease	HMPREF0539_0077	LIVCS family branched chain amino acid:cation symporter	LRHMDP2_1256	Branched-chain amino acid transport system carrier protein	LRHMDP3_665	Branched-chain amino acid transport system carrier protein	LC705_00277	branched-chain amino acid transport protein	PEL5_233	Branched-chain amino acid transport system carrier protein	PEL6_802	Branched-chain amino acid transport system carrier protein	R0011_07867	branched-chain amino acid transport system 2 carrier protein BrnQ
LGG_00293	hypothetical protein	HMPREF0541_00814	hypothetical protein	LRHK_288	cell wall-associated hydrolase	LRHM_0288	hypothetical protein	E800_676	TolA protein	LRH_12659	Cell wall-associated hydrolase	HMPREF0539_0076	cell wall-associated hydrolase	LRHMDP2_1257	TolA protein	LRHMDP3_664	TolA protein	LC705_00278	hypothetical protein	PEL5_232	TolA protein	PEL6_801	TolA protein	R0011_07872	hypothetical protein
LGG_00294	DeoR family transcriptional regulator	HMPREF0541_00811	transcriptional regulator, DeoR family	LRHK_290	bacterial regulatory s, deoR family protein	LRHM_0289	transcriptional regulator	E800_673	Transcriptional regulator, DeoR family	LRH_12664	lactose transport regulator	HMPREF0539_0074	DeoR family transcriptional regulator	LRHMDP2_1260	Transcriptional regulator, DeoR family	LRHMDP3_661	Transcriptional regulator, DeoR family	LC705_00279	transcriptional regulator DeoR family	PEL5_230	Transcriptional regulator, DeoR family	PEL6_799	Transcriptional regulator, DeoR family	R0011_07877	transcriptional regulator DeoR family protein
LGG_00295	glycosyl transferase, group 2	HMPREF0541_00810	glycosyltransferase, group 2 family protein	LRHK_291	glycosyl transferase 2 family protein	LRHM_0290	putative glycosyltransferase	E800_672	Glycosyl transferase family protein	LRH_12669	Glycosyltransferase related enzyme	HMPREF0539_0073	glycosyltransferase family protein	LRHMDP2_1261	Glycosyl transferase family protein	LRHMDP3_660	Glycosyl transferase family protein	LC705_00280	glycosyl transferase group 2	PEL5_229	Glycosyl transferase family protein	PEL6_798	Glycosyl transferase family protein	R0011_07882	glycosyl transferase, group 2
LGG_00296	integral membrane protein	HMPREF0541_00809	hypothetical protein	LRHK_292	hypothetical protein	LRHM_0291	hypothetical protein	E800_671	Predicted integral membrane protein	LRH_12674	Predicted integral membrane protein	HMPREF0539_0072	possible integral membrane protein	LRHMDP2_1262	Predicted integral membrane protein	LRHMDP3_659	Predicted integral membrane protein	LC705_00281	integral membrane protein	PEL5_228	Predicted integral membrane protein	PEL6_797	Predicted integral membrane protein	R0011_07887	integral membrane protein
LGG_00297	hypothetical protein	HMPREF0541_00808	hypothetical protein	LRHK_293	hypothetical protein	LRHM_0292	hypothetical protein	E800_670	FIG00748813: hypothetical protein	LRH_12679	hypothetical protein	HMPREF0539_0071	conserved hypothetical protein	LRHMDP2_1263	FIG00748813: hypothetical protein	LRHMDP3_658	FIG00748813: hypothetical protein	LC705_00282	hypothetical protein	PEL5_227	FIG00748813: hypothetical protein	PEL6_796	FIG00748813: hypothetical protein	R0011_07892	hypothetical protein
LGG_00298	signal peptidase I	HMPREF0541_00807	signal peptidase I	LRHK_294	signal peptidase I	LRHM_0293	signal peptidase I	E800_669	Signal peptidase I	LRH_12684	Signal peptidase I	HMPREF0539_0070	possible signal peptidase I	LRHMDP2_1264	Signal peptidase I	LRHMDP3_657	Signal peptidase I	LC705_00283	signal peptidase I	PEL5_226	Signal peptidase I	PEL6_795	Signal peptidase I	R0011_07897	signal peptidase I
LGG_00299	ADP-ribosylglycohydrolase	HMPREF0541_00806	ADP-ribosylglycohydrolase	LRHK_295	ADP-ribosylglycohydrolase family protein	LRHM_0294	ADP-ribosylglycohydrolase	E800_668	ADP-ribosylglycohydrolase	LRH_12689	ADP-ribosylglycohydrolase	HMPREF0539_0069	ADP-ribosylglycohydrolase	LRHMDP2_1265	ADP-ribosylglycohydrolase	LRHMDP3_656	ADP-ribosylglycohydrolase	LC705_00284	ADP-ribosylglycohydrolase	PEL5_225	ADP-ribosylglycohydrolase	PEL6_794	ADP-ribosylglycohydrolase	R0011_07902	ADP-ribosylglycohydrolase
LGG_00300	ABC transporter ATP-binding protein	HMPREF0541_00804	ABC transporter, ATP-binding protein	LRHK_296	heme ABC transporter ATP-binding protein CcmA	LRHM_0295	ABC transporter ATP-binding protein	E800_667	COG0488: ATPase components of ABC transporters with duplicated ATPase domains	LRH_12694	ATPase component of ABC transporter with duplicated ATPase domains	HMPREF0539_0068	ABC superfamily ATP binding cassette transporter, ABC protein	LRHMDP2_1266	COG0488: ATPase components of ABC transporters with duplicated ATPase domains	LRHMDP3_655	COG0488: ATPase components of ABC transporters with duplicated ATPase domains	LC705_00285	ABC transporter ATPase	PEL5_224	COG0488: ATPase components of ABC transporters with duplicated ATPase domains	PEL6_793	COG0488: ATPase components of ABC transporters with duplicated ATPase domains	R0011_07907	ABC transporter ATPase
LGG_00301	methylase for ubiquinone/menaquinone biosynthesis	HMPREF0541_00802	hypothetical protein	LRHK_297	methyltransferase domain protein	LRHM_0296	hypothetical protein	E800_666	Methylase for ubiquinone/menaquinone biosynthesis	LRH_12699	Methylase for ubiquinone/menaquinone biosynthesis	HMPREF0539_0067	ubiquinone/menaquinone biosynthesis methylase	LRHMDP2_1267	Methylase for ubiquinone/menaquinone biosynthesis	LRHMDP3_654	Methylase for ubiquinone/menaquinone biosynthesis	LC705_00286	methylase for ubiquinone/menaquinone biosynthesis	PEL5_223	Methylase for ubiquinone/menaquinone biosynthesis	PEL6_792	Methylase for ubiquinone/menaquinone biosynthesis	R0011_07912	methylase for ubiquinone/menaquinone biosynthesis
LGG_00305	hypothetical protein
LGG_00306	hypothetical protein																	LC705_00292	hypothetical protein
LGG_00310	thioredoxin	HMPREF0541_00415	putative thioredoxin	LRHK_303	thioredoxin	LRHM_0297	truncated thioredoxin	E800_2348	FIG00743957: hypothetical protein	LRH_10507	Thiol-disulfide isomerase and thioredoxin	HMPREF0539_2596	thioredoxin	LRHMDP2_717	FIG00743957: hypothetical protein	LRHMDP3_2044	FIG00743957: hypothetical protein	LC705_00296	thioredoxin	PEL5_2243	FIG00743957: hypothetical protein	PEL6_1510	FIG00743957: hypothetical protein	R0011_07923	thioredoxin
LGG_00311	threonine/serine exporter	HMPREF0541_00416	hypothetical protein	LRHK_304	hypothetical protein	LRHM_0298	hypothetical protein	E800_2349	FIG00745588: hypothetical protein	LRH_10502	hypothetical protein	HMPREF0539_2597	integral membrane protein	LRHMDP2_718	FIG00745588: hypothetical protein	LRHMDP3_2045	FIG00745588: hypothetical protein	LC705_00297	threonine/Serine Exporter	PEL5_2244	FIG00745588: hypothetical protein	PEL6_1511	FIG00745588: hypothetical protein	R0011_07928	threonine/Serine Exporter
LGG_00312	threonine/serine exporter	HMPREF0541_00417	hypothetical protein	LRHK_305	hypothetical protein	LRHM_0299	hypothetical protein	E800_2350	Integral membrane protein	LRH_10497	hypothetical protein	HMPREF0539_2598	integral membrane protein	LRHMDP2_719	Integral membrane protein	LRHMDP3_2046	Integral membrane protein	LC705_00298	threonine/Serine Exporter	PEL5_2245	Integral membrane protein	PEL6_1512	Integral membrane protein	R0011_07933	threonine/Serine Exporter
LGG_00313	branched-chain amino acid ABC transporter substrate-binding protein	HMPREF0541_00419	ligand-binding protein, receptor family	LRHK_307	receptor ligand binding region family protein	LRHM_0300	branched-chain amino acid ABC transporter substrate binding component	E800_2352	Branched-chain amino acid ABC transporter, amino acid-binding protein (TC 3.A.1.4.1)	LRH_10492	ABC-type branched-chain amino acid transport system, periplasmic component	HMPREF0539_2599	branched chain amino acid ABC superfamily ATP binding cassette transporter, binding protein	LRHMDP2_721	Branched-chain amino acid ABC transporter, amino acid-binding protein (TC 3.A.1.4.1)	LRHMDP3_2047	Branched-chain amino acid ABC transporter, amino acid-binding protein (TC 3.A.1.4.1)	LC705_00299	branched-chain amino acid ABC transporter substrate-binding protein	PEL5_2247	Branched-chain amino acid ABC transporter, amino acid-binding protein (TC 3.A.1.4.1)	PEL6_1514	Branched-chain amino acid ABC transporter, amino acid-binding protein (TC 3.A.1.4.1)	R0011_07943	branched-chain amino acid ABC transporter, substrate binding protein
LGG_00314	branched-chain amino acid ABC transporter permease	HMPREF0541_00420	putative high-affinity branched-chain amino acid ABC transporter, permease protein LivH	LRHK_308	branched-chain amino acid transport system / permease component family protein	LRHM_0301	branched-chain amino acid ABC transporter permease component	E800_2353	High-affinity branched-chain amino acid transport system permease protein LivH (TC 3.A.1.4.1)	LRH_10487	Branched-chain amino acid ABC-type transport system, permease component	HMPREF0539_2600	branched chain amino acid ABC superfamily ATP binding cassette transporter, membrane protein	LRHMDP2_722	High-affinity branched-chain amino acid transport system permease protein LivH (TC 3.A.1.4.1)	LRHMDP3_2048	High-affinity branched-chain amino acid transport system permease protein LivH (TC 3.A.1.4.1)	LC705_00300	branched-chain amino acid ABC transporter permease	PEL5_2248	High-affinity branched-chain amino acid transport system permease protein LivH (TC 3.A.1.4.1)	PEL6_1515	High-affinity branched-chain amino acid transport system permease protein LivH (TC 3.A.1.4.1)	R0011_07948	branched-chain amino acid ABC transporter permease
LGG_00315	branched-chain amino acid ABC transporter permease	HMPREF0541_00421	branched-chain amino acid ABC transporter, permease protein	LRHK_309	branched-chain amino acid transport system / permease component family protein	LRHM_0302	branched-chain amino acid ABC transporter permease component	E800_2354	Branched-chain amino acid transport system permease protein LivM (TC 3.A.1.4.1)	LRH_10482	Predicted amino acid ABC-type transport system, permease component	HMPREF0539_2601	branched chain amino acid ABC superfamily ATP binding cassette transporter, membrane protein	LRHMDP2_723	Branched-chain amino acid transport system permease protein LivM (TC 3.A.1.4.1)	LRHMDP3_2049	Branched-chain amino acid transport system permease protein LivM (TC 3.A.1.4.1)	LC705_00301	branched-chain amino acid ABC transporter permease	PEL5_2249	Branched-chain amino acid transport system permease protein LivM (TC 3.A.1.4.1)	PEL6_1516	Branched-chain amino acid transport system permease protein LivM (TC 3.A.1.4.1)	R0011_07953	branched-chain amino acid ABC transporter permease
LGG_00316	branched-chain amino acid ABC transporter ATP-binding protein	HMPREF0541_00422	ABC transporter, ATP-binding protein	LRHK_310	ABC transporter family protein	LRHM_0303	branched-chain amino acid ABC transporter ATP-binding component	E800_2355	Branched-chain amino acid transport ATP-binding protein LivG (TC 3.A.1.4.1)	LRH_10477	ABC-type branched-chain amino acid transport system, ATPase component	HMPREF0539_2602	ABC superfamily ATP binding cassette transporter, ABC protein	LRHMDP2_724	Branched-chain amino acid transport ATP-binding protein LivG (TC 3.A.1.4.1)	LRHMDP3_2050	Branched-chain amino acid transport ATP-binding protein LivG (TC 3.A.1.4.1)	LC705_00302	branched-chain amino acid ABC transporter ATPase	PEL5_2250	Branched-chain amino acid transport ATP-binding protein LivG (TC 3.A.1.4.1)	PEL6_1517	Branched-chain amino acid transport ATP-binding protein LivG (TC 3.A.1.4.1)	R0011_07958	branched-chain amino acid ABC transporter ATPase
LGG_00317	branched-chain amino acid ABC transporter ATP-binding protein	HMPREF0541_00423	high-affinity branched-chain amino acid ABC transporter, ATP-binding protein LivF	LRHK_311	ABC transporter family protein	LRHM_0304	branched-chain amino acid ABC transporter ATP-binding component	E800_2356	Branched-chain amino acid transport ATP-binding protein LivF (TC 3.A.1.4.1)	LRH_10472	ABC-type branched-chain amino acid transport system, ATPase component	HMPREF0539_2603	ABC superfamily ATP binding cassette transporter, ABC protein	LRHMDP2_725	Branched-chain amino acid transport ATP-binding protein LivF (TC 3.A.1.4.1)	LRHMDP3_2051	Branched-chain amino acid transport ATP-binding protein LivF (TC 3.A.1.4.1)	LC705_00303	branched-chain amino acid ABC transporter ATPase	PEL5_2251	Branched-chain amino acid transport ATP-binding protein LivF (TC 3.A.1.4.1)	PEL6_1518	Branched-chain amino acid transport ATP-binding protein LivF (TC 3.A.1.4.1)	R0011_07963	branched-chain amino acid ABC transporter ATPase
LGG_00318	pyrophosphatase	HMPREF0541_00424	MazG nucleotide pyrophosphohydrolase domain protein	LRHK_312	mazG nucleotide pyrophosphohydrolase domain protein	LRHM_0305	putative pyrophosphatase	E800_2357	Predicted pyrophosphatase	LRH_10467	Predicted pyrophosphatase	HMPREF0539_2604	nucleotide pyrophosphohydrolase	LRHMDP2_726	Predicted pyrophosphatase	LRHMDP3_2052	Predicted pyrophosphatase	LC705_00304	pyrophosphatase	PEL5_2252	Predicted pyrophosphatase	PEL6_1519	Predicted pyrophosphatase	R0011_07968	pyrophosphatase
LGG_00319	alpha/beta hydrolase superfamily protein	HMPREF0541_00425	hypothetical protein	LRHK_313	cell surface hydrolase	LRHM_0306	putative hydrolase	E800_2358	cell surface hydrolase (putative)	LRH_10462	alpha/beta hydrolase superfamily protein	HMPREF0539_2605	alpha/beta hydrolase superfamily protein	LRHMDP2_727	cell surface hydrolase (putative)	LRHMDP3_2053	cell surface hydrolase (putative)	LC705_00305	alpha/beta hydrolase superfamily protein	PEL5_2253	cell surface hydrolase (putative)	PEL6_1520	cell surface hydrolase (putative)	R0011_07973	alpha/beta hydrolase superfamily protein
LGG_00320	PTS system cellobiose-specific transporter subunit IIC	HMPREF0541_00426	PTS system, lactose/cellobiose family IIC component	LRHK_314	phosphotransferase system, EIIC family protein	LRHM_0307	PTS system cellobiose-specific transporter subunit IIC	E800_2359	FIG00747150: hypothetical protein	LRH_10457	cellobiose-specific PTS system IIC component	HMPREF0539_2606	cellobiose-specific PTS system IIC component	LRHMDP2_728	FIG00747150: hypothetical protein	LRHMDP3_2054	FIG00747150: hypothetical protein	LC705_00306	PTS system cellobiose-specific transporter subunit IIC	PEL5_2254	FIG00747150: hypothetical protein	PEL6_1521	FIG00747150: hypothetical protein	R0011_07978	PTS system cellobiose-specific transporter subunit IIC
LGG_00321	deoxyribose-phosphate aldolase	HMPREF0541_00427	deoxyribose-phosphate aldolase	LRHK_315	deoxyribose-phosphate aldolase	LRHM_0308	deoxyribose-phosphate aldolase	E800_1028	Deoxyribose-phosphate aldolase	LRH_12244	Deoxyribose-phosphate aldolase	HMPREF0539_2607	deoxyribose-phosphate aldolase	LRHMDP2_729	Deoxyribose-phosphate aldolase	LRHMDP3_2055	Deoxyribose-phosphate aldolase	LC705_00307	deoxyribose-phosphate aldolase	PEL5_2255	Deoxyribose-phosphate aldolase	PEL6_1522	Deoxyribose-phosphate aldolase	R0011_07983	deoxyribose-phosphate aldolase
LGG_00322	phosphopentomutase	HMPREF0541_00428	phosphopentomutase	LRHK_316	phosphopentomutase	LRHM_0309	phosphopentomutase	E800_1027	Phosphopentomutase	LRH_12239	phosphopentomutase	HMPREF0539_2608	phosphopentomutase	LRHMDP2_730	Phosphopentomutase	LRHMDP3_2056	Phosphopentomutase	LC705_00308	phosphopentomutase	PEL5_2256	Phosphopentomutase	PEL6_1523	Phosphopentomutase	R0011_07988	phosphopentomutase
LGG_00323	purine nucleoside phosphorylase	HMPREF0541_00429	purine nucleoside phosphorylase	LRHK_317	purine nucleoside phosphorylase	LRHM_0310	purine-nucleoside phosphorylase	E800_1026	Purine nucleoside phosphorylase	LRH_12234	Purine-nucleoside phosphorylase	HMPREF0539_2609	purine-nucleoside phosphorylase	LRHMDP2_731	Purine nucleoside phosphorylase	LRHMDP3_2057	Purine nucleoside phosphorylase	LC705_00309	purine nucleoside phosphorylase	PEL5_2257	Purine nucleoside phosphorylase	PEL6_1524	Purine nucleoside phosphorylase	R0011_07993	purine nucleoside phosphorylase
LGG_00324	cell wall-associated glycoside hydrolase (NLP/P60 protein)	HMPREF0541_00430	NlpC/P60 family protein	LRHK_318	nlpC/P60 family protein	LRHM_0311	putative cell wall-associated hydrolase	E800_1025	2-hydroxy-6-oxo-6-phenylhexa-2,4-dienoate hydrolase	LRH_12224	Cell wall-associated hydrolase	HMPREF0539_2610	cell wall-associated hydrolase	LRHMDP2_732	2-hydroxy-6-oxo-6-phenylhexa-2,4-dienoate hydrolase	LRHMDP3_2058	2-hydroxy-6-oxo-6-phenylhexa-2,4-dienoate hydrolase	LC705_00310	cell wall-associated glycoside hydrolase (NLP/P60 protein)	PEL5_2258	2-hydroxy-6-oxo-6-phenylhexa-2,4-dienoate hydrolase	PEL6_1525	2-hydroxy-6-oxo-6-phenylhexa-2,4-dienoate hydrolase	R0011_07998	cell wall-associated glycoside hydrolase (NLP/P60 protein)
LGG_00325	NADH oxidase	HMPREF0541_00431	NADH oxidase	LRHK_319	NADH oxidase	LRHM_0312	hypothetical protein	E800_1024	NADH peroxidase Npx	LRH_12219	Uncharacterized NAD(FAD)-dependent dehydrogenase	HMPREF0539_2611	NADH dehydrogenase	LRHMDP2_733	NADH peroxidase Npx	LRHMDP3_2059	NADH peroxidase Npx	LC705_00311	NADH oxidase	PEL5_2259	NADH peroxidase Npx	PEL6_1526	NADH peroxidase Npx	R0011_08003	NADH oxidase
LGG_00326	hypothetical protein	HMPREF0541_00438	hypothetical protein	LRHK_325	sepS16B protein	LRHM_0313	hypothetical protein	E800_1023	FIG00743612: hypothetical protein	LRH_12214	hypothetical protein	HMPREF0539_2618	conserved hypothetical protein	LRHMDP2_738	FIG00743612: hypothetical protein	LRHMDP3_2064	FIG00743612: hypothetical protein	LC705_00316	hypothetical protein	PEL5_2260	FIG00743612: hypothetical protein	PEL6_1527	FIG00743612: hypothetical protein	R0011_08028	hypothetical protein
LGG_00327	hypothetical protein	HMPREF0541_00439	hypothetical protein	LRHK_326	hypothetical protein	LRHM_0314	hypothetical protein	E800_1022	FIG00747444: hypothetical protein	LRH_12209	hypothetical protein	HMPREF0539_2619	conserved hypothetical protein	LRHMDP2_739	FIG00747444: hypothetical protein	LRHMDP3_2065	FIG00747444: hypothetical protein	LC705_00317	hypothetical protein	PEL5_2261	FIG00747444: hypothetical protein	PEL6_1528	FIG00747444: hypothetical protein	R0011_08033	hypothetical protein
LGG_00328	ATP-dependent helicase	HMPREF0541_00440	hypothetical protein	LRHK_327	DEAD/DEAH box helicase	LRHM_0315	putative DNA helicase	E800_1021	DinG family ATP-dependent helicase CPE1197	LRH_12204	Rad3-related DNA helicase	HMPREF0539_2620	DNA-directed DNA polymerase III epsilon subunit	LRHMDP2_740	DinG family ATP-dependent helicase CPE1197	LRHMDP3_2066	DinG family ATP-dependent helicase CPE1197	LC705_00318	ATP-dependent helicase	PEL5_2262	DinG family ATP-dependent helicase CPE1197	PEL6_1529	DinG family ATP-dependent helicase CPE1197	R0011_08038	ATP-dependent helicase
LGG_00329	sugar ABC transporter substrate-binding protein	HMPREF0541_00442	ABC transporter, solute-binding protein	LRHK_328	bacterial extracellular solute-binding family protein	LRHM_0316	ABC transporter substrate binding component	E800_1019	Glycerol-3-phosphate ABC transporter, periplasmic glycerol-3-phosphate-binding protein (TC 3.A.1.1.3)	LRH_12199	ABC-type sugar transport system, periplasmic component	HMPREF0539_2621	sugar ABC superfamily ATP binding cassette transporter, periplasmic component	LRHMDP2_741	Glycerol-3-phosphate ABC transporter, periplasmic glycerol-3-phosphate-binding protein (TC 3.A.1.1.3)	LRHMDP3_2067	Glycerol-3-phosphate ABC transporter, periplasmic glycerol-3-phosphate-binding protein (TC 3.A.1.1.3)	LC705_00319	sugar ABC transporter substrate-binding protein	PEL5_2263	Glycerol-3-phosphate ABC transporter, periplasmic glycerol-3-phosphate-binding protein (TC 3.A.1.1.3)	PEL6_1530	Glycerol-3-phosphate ABC transporter, periplasmic glycerol-3-phosphate-binding protein (TC 3.A.1.1.3)	R0011_08043	sugar ABC transporter periplasmic component
LGG_00330	hypothetical protein	HMPREF0541_00444	hypothetical protein	LRHK_329	hypothetical protein	LRHM_0317	hypothetical protein	E800_1017	FIG00745492: hypothetical protein	LRH_12194	hypothetical protein	HMPREF0539_2622	conserved hypothetical protein	LRHMDP2_743	FIG00745492: hypothetical protein	LRHMDP3_2069	FIG00745492: hypothetical protein	LC705_00320	hypothetical protein	PEL5_2265	FIG00745492: hypothetical protein	PEL6_1532	FIG00745492: hypothetical protein	R0011_08048	hypothetical protein
LGG_00331	Mannose-6-phosphate isomerase	HMPREF0541_00445	mannose-6-phosphate isomerase, class I	LRHK_333	mannose-6-phosphate isomerase	LRHM_0318	mannose-6-phosphate isomerase	E800_1016	Mannose-6-phosphate isomerase	LRH_12189	Phosphomannose isomerase	HMPREF0539_2626	mannose-6-phosphate isomerase	LRHMDP2_747	Mannose-6-phosphate isomerase	LRHMDP3_2073	Mannose-6-phosphate isomerase	LC705_00324	mannose-6-phosphate isomerase	PEL5_2266	Mannose-6-phosphate isomerase	PEL6_1533	Mannose-6-phosphate isomerase	R0011_08053	mannose-6-phosphate isomerase
LGG_00332	GntR family transcriptional regulator	HMPREF0541_00446	UbiC transcription regulator-associated domain protein	LRHK_334	bacterial regulatory s, gntR family protein	LRHM_0319	putative transcriptional regulator	E800_1015	Transcriptional regulator, GntR family	LRH_12184	Transcriptional regulator	HMPREF0539_2627	GntR family transcriptional regulator	LRHMDP2_748	Transcriptional regulator, GntR family	LRHMDP3_2074	Transcriptional regulator, GntR family	LC705_00325	GntR family transcriptional regulator	PEL5_2267	Transcriptional regulator, GntR family	PEL6_1534	Transcriptional regulator, GntR family	R0011_08058	GntR family transcriptional regulator
LGG_00333	tagatose-6-phosphate ketose/aldose isomerase	HMPREF0541_00447	sugar isomerase, AgaS family	LRHK_335	sugar isomerase	LRHM_0320	putative phosphosugar isomerase	E800_1014	Galactosamine-6-phosphate isomerase	LRH_12179	Predicted phosphosugar isomerase	HMPREF0539_2628	phosphosugar isomerase	LRHMDP2_749	Galactosamine-6-phosphate isomerase	LRHMDP3_2075	Galactosamine-6-phosphate isomerase	LC705_00326	tagatose-6-phosphate ketose/aldose isomerase	PEL5_2268	Galactosamine-6-phosphate isomerase	PEL6_1535	Galactosamine-6-phosphate isomerase	R0011_08063	tagatose-6-phosphate ketose/aldose isomerase
LGG_00334	N-acetylglucosamine-6-phosphate deacetylase	HMPREF0541_00448	N-acetylglucosamine-6-phosphate deacetylase	LRHK_336	N-acetylglucosamine-6-phosphate deacetylase	LRHM_0321	N-acetylglucosamine-6-phosphate deacetylase	E800_1013	N-acetylglucosamine-6-phosphate deacetylase	LRH_12174	N-acetylglucosamine-6-phosphate deacetylase	HMPREF0539_2629	N-acetylglucosamine-6-phosphate deacetylase	LRHMDP2_750	N-acetylglucosamine-6-phosphate deacetylase	LRHMDP3_2076	N-acetylglucosamine-6-phosphate deacetylase	LC705_00327	N-acetylglucosamine-6-phosphate deacetylase	PEL5_2269	N-acetylglucosamine-6-phosphate deacetylase	PEL6_1536	N-acetylglucosamine-6-phosphate deacetylase	R0011_08068	N-acetylglucosamine-6-phosphate deacetylase
LGG_00335	hypothetical protein																			PEL5_2270	ATP-dependent nuclease, subunit B	PEL6_1537	Malolactic regulator
LGG_00336	beta-galactosidase (GH35)	HMPREF0541_00450	glycosyl hydrolase family 35	LRHK_337	beta-galactosidase family protein	LRHM_0322	beta-galactosidase	E800_1011	Beta-galactosidase 3	LRH_12169	glycosyl hydrolase, family 35	HMPREF0539_2630	beta-galactosidase	LRHMDP2_751	Beta-galactosidase 3	LRHMDP3_2077	Beta-galactosidase 3	LC705_00328	beta-galactosidase	PEL5_2271	Beta-galactosidase 3	PEL6_1538	Beta-galactosidase 3
LGG_00337	PTS system mannose-specific transporter subunit IIB	HMPREF0541_00451	PTS system sorbose subfamily IIB component	LRHK_338	PTS system sorbose subIIB component family protein	LRHM_0323	PTS system IIB component	E800_1010	PTS system, mannose-specific IIB component	LRH_12164	PTS system, IIB component	HMPREF0539_2632	possible N(pi)-phosphohistidine--sugar phosphotransferase	LRHMDP2_752	PTS system, mannose-specific IIB component	LRHMDP3_2078	PTS system, mannose-specific IIB component	LC705_00329	PTS system mannose-specific transporter subunit IIB	PEL5_2272	PTS system, mannose-specific IIB component	PEL6_1539	PTS system, mannose-specific IIB component	R0011_08083	PTS system mannose-specific transporter subunit IIB
LGG_00338	PTS system mannose-specific transporter subunit IIC	HMPREF0541_00452	PTS system sorbose-specific iic component	LRHK_339	PTS system sorbose-specific iic component family protein	LRHM_0325	putative PTS system IIC component	E800_1009	phosphoenolpyruvate-dependent sugar phosphotransferase system EIIC, probable mannose specific	LRH_12159	PTS system, IIC component	HMPREF0539_2633	PTS system, IIC component protein	LRHMDP2_753	phosphoenolpyruvate-dependent sugar phosphotransferase system EIIC, probable mannose specific	LRHMDP3_2079	phosphoenolpyruvate-dependent sugar phosphotransferase system EIIC, probable mannose specific	LC705_00330	PTS system mannose-specific transporter subunit IIC	PEL5_2273	phosphoenolpyruvate-dependent sugar phosphotransferase system EIIC, probable mannose specific	PEL6_1540	phosphoenolpyruvate-dependent sugar phosphotransferase system EIIC, probable mannose specific	R0011_08088	PTS system mannose-specific transporter subunit IIC
LGG_00339	PTS system mannose-specific transporter subunit IID	HMPREF0541_00453	PTS system mannose/fructose/sorbose family IID component	LRHK_340	PTS system mannose/fructose/sorbose IID component family protein	LRHM_0326	PTS system IID component	E800_1008	PTS system, mannose-specific IID component	LRH_12154	PTS system, IID component	HMPREF0539_2634	PTS family mannose/fructose/sorbose porter component IID	LRHMDP2_754	PTS system, mannose-specific IID component	LRHMDP3_2080	PTS system, mannose-specific IID component	LC705_00331	PTS system mannose-specific transporter subunit IID	PEL5_2274	PTS system, mannose-specific IID component	PEL6_1541	PTS system, mannose-specific IID component	R0011_08093	PTS system mannose-specific transporter subunit IID
LGG_00340	PTS system mannose-specific transporter subunit IIA	HMPREF0541_00454	PTS system fructose IIA component	LRHK_342	PTS system fructose IIA component family protein	LRHM_0327	PTS system transporter subunit IIA	E800_1007	phosphoenolpyruvate-dependent sugar phosphotransferase system EIIA, probable mannose specific	LRH_12149	Phosphotransferase system, mannose/fructose-specific component IIA	HMPREF0539_2635	PTS family mannose/fructose/sorbose porter component IIA	LRHMDP2_755	phosphoenolpyruvate-dependent sugar phosphotransferase system EIIA, probable mannose specific	LRHMDP3_2081	phosphoenolpyruvate-dependent sugar phosphotransferase system EIIA, probable mannose specific	LC705_00332	PTS system mannose-specific transporter subunit IIA	PEL5_2275	phosphoenolpyruvate-dependent sugar phosphotransferase system EIIA, probable mannose specific	PEL6_1543	phosphoenolpyruvate-dependent sugar phosphotransferase system EIIA, probable mannose specific	R0011_08098	PTS system mannose-specific transporter subunit IIA
LGG_00341	tagatose-6-phosphate kinase	HMPREF0541_00455	putative tagatose-6-phosphate kinase			LRHM_0328	tagatose-6-phosphate kinase	E800_1006	Tagatose-6-phosphate kinase / 1-phosphofructokinase	LRH_12144	tagatose-6-phosphate kinase			LRHMDP2_756	Tagatose-6-phosphate kinase / 1-phosphofructokinase	LRHMDP3_2082	Tagatose-6-phosphate kinase / 1-phosphofructokinase			PEL5_2276	Tagatose-6-phosphate kinase / 1-phosphofructokinase	PEL6_1544	Tagatose-6-phosphate kinase / 1-phosphofructokinase	R0011_08103	tagatose-6-phosphate kinase
LGG_00342	sorbitol-6-phosphate 2-dehydrogenase	HMPREF0541_00456	oxidoreductase, short chain dehydrogenase/reductase family protein			LRHM_0329	sorbitol-6-phosphate 2-dehydrogenase	E800_1005	Sorbitol-6-phosphate 2-dehydrogenase	LRH_12139	sorbitol-6-phosphate 2-dehydrogenase			LRHMDP2_757	Sorbitol-6-phosphate 2-dehydrogenase	LRHMDP3_2083	Sorbitol-6-phosphate 2-dehydrogenase			PEL5_2277	Sorbitol-6-phosphate 2-dehydrogenase	PEL6_1545	Sorbitol-6-phosphate 2-dehydrogenase	R0011_08108	sorbitol-6-phosphate 2-dehydrogenase
LGG_00343	PTS system galactitol-specific transporter subunit IIC	HMPREF0541_00457	galactitol permease IIC component			LRHM_0330	PTS system galactitol-specific IIC component	E800_1004	PTS system, galactitol-specific IIC component	LRH_12134	PTS system, galactitol-specific enzyme II, C component			LRHMDP2_758	PTS system, galactitol-specific IIC component	LRHMDP3_2084	PTS system, galactitol-specific IIC component			PEL5_2278	PTS system, galactitol-specific IIC component	PEL6_1546	PTS system, galactitol-specific IIC component	R0011_08113	PTS system, galactitol-specific IIC component
LGG_00344	transposase IS5 family protein					LRHM_0331	putative transposase	E800_2450	Mobile element protein											PEL5_2307	Mobile element protein
LGG_00345	PTS system galactitol-specific transporter subunit IIA	HMPREF0541_00458	phosphoenolpyruvate-dependent sugar phosphotransferase system, EIIA 2			LRHM_0332	putative PTS system IIA component	E800_1599	PTS system, galactitol-specific IIA component	LRH_12129	Phosphotransferase system mannitol/fructose-specific IIA domain (Ntr-type)			LRHMDP2_759	PTS system, galactitol-specific IIA component	LRHMDP3_2085	PTS system, galactitol-specific IIA component			PEL5_1683	PTS system, galactitol-specific IIA component	PEL6_2111	PTS system, galactitol-specific IIA component	R0011_08118	PTS system galactitol-specific transporter subunit IIA
LGG_00346	PTS system galactitol-specific transporter subunit IIB	HMPREF0541_00459	PTS system, Lactose/Cellobiose specific IIB subunit			LRHM_0333	putative PTS system IIB component	E800_1598	PTS system, galactitol-specific IIB component	LRH_12124	PTS system, galactitol-specific enzyme II, B component			LRHMDP2_760	PTS system, galactitol-specific IIB component	LRHMDP3_2086	PTS system, galactitol-specific IIB component			PEL5_1684	PTS system, galactitol-specific IIB component	PEL6_2110	PTS system, galactitol-specific IIB component	R0011_08123	PTS system galactitol-specific transporter subunit IIB
LGG_00347	hypothetical protein	HMPREF0541_00460	hypothetical protein			LRHM_0334	hypothetical protein	E800_1597	FIG00743883: hypothetical protein	LRH_12119	hypothetical protein			LRHMDP2_761	FIG00743883: hypothetical protein	LRHMDP3_2087	FIG00743883: hypothetical protein			PEL5_1685	FIG00743883: hypothetical protein	PEL6_2109	FIG00743883: hypothetical protein	R0011_08128	hypothetical protein
LGG_00348	lipopolysaccharide biosynthesis protein			LRHK_343	glycosyl transferases group 1 family protein	LRHM_0335	putative glycosyltransferase	E800_1596	Poly(glycerol-phosphate) alpha-glucosyltransferase			HMPREF0539_2636	glycosyltransferase	LRHMDP2_762	Poly(glycerol-phosphate) alpha-glucosyltransferase	LRHMDP3_2088	Poly(glycerol-phosphate) alpha-glucosyltransferase	LC705_00333	lipopolysaccharide biosynthesis protein	PEL5_1686	Poly(glycerol-phosphate) alpha-glucosyltransferase	PEL6_2108	Poly(glycerol-phosphate) alpha-glucosyltransferase	R0011_08133	lipopolysaccharide biosynthesis protein
LGG_00349	poly(Glycerol-phosphate) alpha-glucosyltransferase	HMPREF0541_00463	glycosyltransferase, group 1 family protein	LRHK_344	glycosyl transferases group 1 family protein	LRHM_0336	putative glycosyltransferase	E800_1595	Poly(glycerol-phosphate) alpha-glucosyltransferase	LRH_01077	lipopolysaccharide biosynthesis protein	HMPREF0539_2637	glycosyltransferase	LRHMDP2_763	Poly(glycerol-phosphate) alpha-glucosyltransferase	LRHMDP3_2089	Poly(glycerol-phosphate) alpha-glucosyltransferase	LC705_00334	poly(Glycerol-phosphate) alpha-glucosyltransferase	PEL5_1687	Poly(glycerol-phosphate) alpha-glucosyltransferase	PEL6_2107	Poly(glycerol-phosphate) alpha-glucosyltransferase	R0011_08138	poly(Glycerol-phosphate) alpha-glucosyltransferase
LGG_00350	hypothetical protein	HMPREF0541_00464	hypothetical protein	LRHK_345	hypothetical protein	LRHM_0337	hypothetical protein	E800_1594	Putative uncharacterized protein	LRH_01072	hypothetical protein	HMPREF0539_2638	conserved hypothetical protein	LRHMDP2_764	Putative uncharacterized protein	LRHMDP3_2090	Putative uncharacterized protein	LC705_00335	hypothetical protein	PEL5_1688	Putative uncharacterized protein	PEL6_2106	Putative uncharacterized protein	R0011_08143	hypothetical protein
LGG_00351	aminotransferase	HMPREF0541_00465	aminotransferase, class I/II	LRHK_346	aminotransferase class I and II family protein	LRHM_0338	putative aminotransferase	E800_1593	Aspartate aminotransferase	LRH_01067	putative aminotransferase	HMPREF0539_2639	possible cystathionine beta-lyase	LRHMDP2_765	Aspartate aminotransferase	LRHMDP3_2091	Aspartate aminotransferase	LC705_00336	aminotransferase	PEL5_1689	Aspartate aminotransferase	PEL6_2105	Aspartate aminotransferase	R0011_08148	aminotransferase
LGG_00352	aminopeptidase YpdF	HMPREF0541_00466	Creatinase	LRHK_347	metallopeptidase M24 family protein	LRHM_0339	putative peptidase	E800_1592	Aminopeptidase YpdF (MP-, MA-, MS-, AP-, NP- specific)	LRH_01062	putative peptidase	HMPREF0539_2640	possible Xaa-Pro dipeptidase	LRHMDP2_766	Aminopeptidase YpdF (MP-, MA-, MS-, AP-, NP- specific)	LRHMDP3_2092	Aminopeptidase YpdF (MP-, MA-, MS-, AP-, NP- specific)	LC705_00337	aminopeptidase YpdF	PEL5_1690	Aminopeptidase YpdF (MP-, MA-, MS-, AP-, NP- specific)	PEL6_2104	Aminopeptidase YpdF (MP-, MA-, MS-, AP-, NP- specific)	R0011_08153	aminopeptidase YpdF
LGG_00353	PTS system transporter subunit IIC	HMPREF0541_00467	PTS system, lactose/cellobiose family IIC component	LRHK_348	PTS system, lactose/cellobiose IIC component family protein	LRHM_0340	PTS system IIC component	E800_1591	PTS system, cellobiose-specific IIC component	LRH_01057	PTS system, IIc component	HMPREF0539_2641	PTS system, IIc component protein	LRHMDP2_767	PTS system, cellobiose-specific IIC component	LRHMDP3_2093	PTS system, cellobiose-specific IIC component	LC705_00338	PTS system transporter subunit IIC	PEL5_1691	PTS system, cellobiose-specific IIC component	PEL6_2103	PTS system, cellobiose-specific IIC component	R0011_08158	PTS system transporter subunit IIC
LGG_00354	PTS system lactose/cellobiose-specific transporter subunit IIB	HMPREF0541_00468	hypothetical protein	LRHK_349	PTS system, Lactose/Cellobiose specific IIB subunit	LRHM_0341	PTS system IIB component	E800_1590	PTS system, beta-glucoside-specific, IIB component	LRH_01052	PTS system, IIb component	HMPREF0539_2642	possible N(pi)-phosphohistidine--sugar phosphotransferase	LRHMDP2_768	PTS system, beta-glucoside-specific, IIB component	LRHMDP3_2094	PTS system, beta-glucoside-specific, IIB component	LC705_00339	PTS system lactose/cellobiose-specific transporter subunit IIB	PEL5_1692	PTS system, beta-glucoside-specific, IIB component	PEL6_2102	PTS system, beta-glucoside-specific, IIB component	R0011_08163	PTS system lactose/cellobiose-specific transporter subunit IIB
LGG_00355	PTS system lactose/cellobiose-specific transporter subunit IIA	HMPREF0541_00469	PTS system, Lactose/Cellobiose specific IIA subunit	LRHK_350	PTS system, Lactose/Cellobiose specific IIA subunit	LRHM_0342	PTS system transporter subunit IIA	E800_1589	PTS system, cellobiose-specific IIA component	LRH_01047	phosphotransferase system PTS, lactose/cellobiose-specific IIA subunit	HMPREF0539_2643	PTS family lactose-N,N-diacetylchitobiose-beta-glucoside (lac) porter component IIA	LRHMDP2_769	PTS system, cellobiose-specific IIA component	LRHMDP3_2095	PTS system, cellobiose-specific IIA component	LC705_00340	PTS system lactose/cellobiose-specific transporter subunit IIA	PEL5_1693	PTS system, cellobiose-specific IIA component	PEL6_2101	PTS system, cellobiose-specific IIA component	R0011_08168	PTS system lactose/cellobiose-specific transporter subunit IIA
LGG_00356	aminopeptidase	HMPREF0541_00470	M42 glutamyl aminopeptidase	LRHK_351	aminopeptidase ypdE	LRHM_0343	putative endoglucanase	E800_1588	Nondeblocking aminopeptidase YpdE (X-X-[^PR]- specific)	LRH_01042	exoaminopeptidase	HMPREF0539_2644	possible glutamyl aminopeptidase	LRHMDP2_770	Nondeblocking aminopeptidase YpdE (X-X-[^PR]- specific)	LRHMDP3_2096	Nondeblocking aminopeptidase YpdE (X-X-[^PR]- specific)	LC705_00341	aminopeptidase	PEL5_1694	Nondeblocking aminopeptidase YpdE (X-X-[^PR]- specific)	PEL6_2100	Nondeblocking aminopeptidase YpdE (X-X-[^PR]- specific)	R0011_08173	aminopeptidase
LGG_00357	transcription antiterminator	HMPREF0541_00471	HTH domain protein	LRHK_352	deoR-like helix-turn-helix domain protein	LRHM_0344	putative transcription antiterminator	E800_1587	Transcriptional antiterminator of lichenan operon, BglG family	LRH_01037	putative transcription antiterminator	HMPREF0539_2645	probable transcription antiterminator	LRHMDP2_771	Transcriptional antiterminator of lichenan operon, BglG family	LRHMDP3_2097	Transcriptional antiterminator of lichenan operon, BglG family	LC705_00342	transcription antiterminator	PEL5_1695	Transcriptional antiterminator of lichenan operon, BglG family	PEL6_2099	Transcriptional antiterminator of lichenan operon, BglG family	R0011_08178	transcription antiterminator
LGG_00358	peptidase T	HMPREF0541_00473	peptidase T	LRHK_353	peptidase T	LRHM_0345	peptidase	E800_1586	Tripeptide aminopeptidase	LRH_01032	peptidase T	HMPREF0539_2646	tripeptide aminopeptidase	LRHMDP2_772	Tripeptide aminopeptidase	LRHMDP3_2098	Tripeptide aminopeptidase	LC705_00343	peptidase T	PEL5_1696	Tripeptide aminopeptidase	PEL6_2098	Tripeptide aminopeptidase	R0011_08183	peptidase T
LGG_00359	ABC transporter oligopeptide-binding protein	HMPREF0541_00474	ABC transporter, substrate-binding protein, family 5	LRHK_354	peptide ABC transporter peptide-binding protein	LRHM_0346	oligopeptide ABC transporter substrate-binding protein	E800_1585	Oligopeptide ABC transporter, periplasmic oligopeptide-binding protein OppA (TC 3.A.1.5.1)	LRH_01027	ABC-type oligopeptide transport system, periplasmic component	HMPREF0539_2647	peptide ABC superfamily ATP binding cassette transporter, binding protein	LRHMDP2_773	Oligopeptide ABC transporter, periplasmic oligopeptide-binding protein OppA (TC 3.A.1.5.1)	LRHMDP3_2099	Oligopeptide ABC transporter, periplasmic oligopeptide-binding protein OppA (TC 3.A.1.5.1)	LC705_00344	oligopeptide ABC transporter substrate-binding protein	PEL5_1697	Oligopeptide ABC transporter, periplasmic oligopeptide-binding protein OppA (TC 3.A.1.5.1)	PEL6_2097	Oligopeptide ABC transporter, periplasmic oligopeptide-binding protein OppA (TC 3.A.1.5.1)	R0011_08188	oligopeptide ABC transporter substrate-binding protein
LGG_00360	acetyltransferase	HMPREF0541_00475	acetyltransferase, GNAT family	LRHK_355	acetyltransferase family protein	LRHM_0347	hypothetical protein	E800_1584	Acetyltransferase	LRH_01022	acetyltransferase	HMPREF0539_2648	acetyltransferase	LRHMDP2_774	Acetyltransferase	LRHMDP3_2100	Acetyltransferase	LC705_00345	acetyltransferase	PEL5_1698	Acetyltransferase	PEL6_2096	Acetyltransferase	R0011_08193	acetyltransferase
LGG_00361	hypothetical protein	HMPREF0541_00478	hypothetical protein	LRHK_356	hypothetical protein	LRHM_0348	hypothetical protein	E800_1583	FIG00745994: hypothetical protein	LRH_01017	hypothetical protein	HMPREF0539_2650	conserved hypothetical protein	LRHMDP2_775	FIG00745994: hypothetical protein	LRHMDP3_2101	FIG00745994: hypothetical protein	LC705_00346	hypothetical protein	PEL5_1699	FIG00745994: hypothetical protein	PEL6_2095	FIG00745994: hypothetical protein
LGG_00362	cobalt ABC transporter ATPase and permeases	HMPREF0541_00480	hypothetical protein	LRHK_359	ABC transporter family protein	LRHM_0350	putative multidrug ABC transporter ATP-binding and permease components	E800_1580	Multidrug resistance protein 12 (P-glycoprotein 14)			HMPREF0539_2653	multidrug ABC superfamily ATP binding cassette transporter, ATPase and permease protein	LRHMDP2_778	Multidrug resistance protein 12 (P-glycoprotein 14)	LRHMDP3_12	Multidrug resistance protein 12 (P-glycoprotein 14)	LC705_00349	cobalt ABC transporter ATPase/permease	PEL5_1702	Multidrug resistance protein 12 (P-glycoprotein 14)	PEL6_2093	Multidrug resistance protein 12 (P-glycoprotein 14)
LGG_00363	cobalt ABC transporter permease	HMPREF0541_00481	hypothetical protein	LRHK_362	ABC-type cobalt transport system, permease component family protein	LRHM_0351	cobalt ABC transporter permease	E800_1579	Substrate-specific component YkoE of thiamin-regulated ECF transporter for HydroxyMethylPyrimidine	LRH_01002	ABC-type cobalt transport system, permease component	HMPREF0539_2656	ABC superfamily ATP binding cassette transporter, membrane protein	LRHMDP2_779	Substrate-specific component YkoE of thiamin-regulated ECF transporter for HydroxyMethylPyrimidine	LRHMDP3_13	Substrate-specific component YkoE of thiamin-regulated ECF transporter for HydroxyMethylPyrimidine	LC705_00352	cobalt ABC transporter permease	PEL5_1703	Substrate-specific component YkoE of thiamin-regulated ECF transporter for HydroxyMethylPyrimidine	PEL6_2092	Substrate-specific component YkoE of thiamin-regulated ECF transporter for HydroxyMethylPyrimidine	R0011_08208	cobalt ABC transporter permease
LGG_00364	cobalt ABC transporter ATP-binding protein	HMPREF0541_00482	ABC transporter, ATP-binding protein	LRHK_364	ABC transporter, cobalt transporter ATPase component domain protein	LRHM_0352	cobalt ABC transporter ATP-binding component	E800_1578	Duplicated ATPase component YkoD of energizing module of thiamin-regulated ECF transporter for HydroxyMethylPyrimidine	LRH_00997	ABC-type cobalt transport system, ATPase component	HMPREF0539_2657	ABC superfamily ATP binding cassette transporter, ABC protein	LRHMDP2_780	Duplicated ATPase component YkoD of energizing module of thiamin-regulated ECF transporter for HydroxyMethylPyrimidine	LRHMDP3_14	Duplicated ATPase component YkoD of energizing module of thiamin-regulated ECF transporter for HydroxyMethylPyrimidine	LC705_00353	cobalt ABC transporter ATPase	PEL5_1704	Duplicated ATPase component YkoD of energizing module of thiamin-regulated ECF transporter for HydroxyMethylPyrimidine	PEL6_2091	Duplicated ATPase component YkoD of energizing module of thiamin-regulated ECF transporter for HydroxyMethylPyrimidine	R0011_08213	cobalt ABC transporter ATP-binding protein
LGG_00365	cobalt ABC transporter permease	HMPREF0541_00483	hypothetical protein	LRHK_365	hypothetical protein	LRHM_0353	cobalt ABC transporter permease	E800_1577	Transmembrane component YkoC of energizing module of thiamin-regulated ECF transporter for HydroxyMethylPyrimidine	LRH_00992	ABC-type cobalt transport system, permease component CbiQ related transporter	HMPREF0539_2658	ABC superfamily ATP binding cassette transporter, permease protein	LRHMDP2_781	Transmembrane component YkoC of energizing module of thiamin-regulated ECF transporter for HydroxyMethylPyrimidine	LRHMDP3_15	Transmembrane component YkoC of energizing module of thiamin-regulated ECF transporter for HydroxyMethylPyrimidine	LC705_00354	cobalt ABC transporter permease	PEL5_1705	Transmembrane component YkoC of energizing module of thiamin-regulated ECF transporter for HydroxyMethylPyrimidine	PEL6_2090	Transmembrane component YkoC of energizing module of thiamin-regulated ECF transporter for HydroxyMethylPyrimidine	R0011_08218	cobalt ABC transporter permease
LGG_00366	transcriptional activator tenA	HMPREF0541_00484	TENA/THI-4 family protein	LRHK_366	TENA/THI-4/PQQC family protein	LRHM_0354	transcriptional regulator	E800_1576	Thiaminase II	LRH_00987	Putative transcription activator	HMPREF0539_2659	thiaminase	LRHMDP2_782	Thiaminase II	LRHMDP3_16	Thiaminase II	LC705_00355	transcriptional activator tenA	PEL5_1706	Thiaminase II	PEL6_2089	Thiaminase II	R0011_08223	transcriptional activator tenA
LGG_00367	hydroxyethylthiazole permease	HMPREF0541_00485	protein ThiW	LRHK_367	thiamine- transporter family protein	LRHM_0355	thiamine-precursor transporter protein	E800_1575	Substrate-specific component ThiW of predicted thiazole ECF transporter	LRH_00982	Predicted membrane protein	HMPREF0539_2660	ThiW protein	LRHMDP2_783	Substrate-specific component ThiW of predicted thiazole ECF transporter	LRHMDP3_17	Substrate-specific component ThiW of predicted thiazole ECF transporter	LC705_00356	hydroxyethylthiazole permease	PEL5_1707	Substrate-specific component ThiW of predicted thiazole ECF transporter	PEL6_2088	Substrate-specific component ThiW of predicted thiazole ECF transporter	R0011_08228	hydroxyethylthiazole permease
LGG_00368	hydroxyethylthiazole kinase	HMPREF0541_00486	putative hydroxyethylthiazole kinase	LRHK_368	hydroxyethylthiazole kinase	LRHM_0356	hydroxyethylthiazole kinase	E800_1574	Hydroxyethylthiazole kinase	LRH_00977	Hydroxyethylthiazole kinase, sugar kinase family protein	HMPREF0539_2661	possible hydroxyethylthiazole kinase	LRHMDP2_784	Hydroxyethylthiazole kinase	LRHMDP3_18	Hydroxyethylthiazole kinase	LC705_00357	hydroxyethylthiazole kinase	PEL5_1708	Hydroxyethylthiazole kinase	PEL6_2087	Hydroxyethylthiazole kinase	R0011_08233	hydroxyethylthiazole kinase
LGG_00369	thiamine-phosphate pyrophosphorylase	HMPREF0541_00487	thiamine-phosphate diphosphorylase	LRHK_370	thiamine-phosphate pyrophosphorylase	LRHM_0357	thiamine-phosphate pyrophosphorylase	E800_1573	Thiamin-phosphate pyrophosphorylase	LRH_00972	Thiamine monophosphate synthase	HMPREF0539_2663	thiamine-phosphate diphosphorylase	LRHMDP2_785	Thiamin-phosphate pyrophosphorylase	LRHMDP3_19	Thiamin-phosphate pyrophosphorylase	LC705_00359	thiamine-phosphate pyrophosphorylase	PEL5_1709	Thiamin-phosphate pyrophosphorylase	PEL6_2086	Thiamin-phosphate pyrophosphorylase	R0011_08238	thiamine-phosphate pyrophosphorylase
LGG_00370	phosphomethylpyrimidine kinase	HMPREF0541_00488	phosphomethylpyrimidine kinase	LRHK_371	phosphomethylpyrimidine kinase	LRHM_0358	phosphomethylpyrimidine kinase	E800_1572	Hydroxymethylpyrimidine phosphate kinase ThiD	LRH_00967	Hydroxymethylpyrimidine/phosphomethylpyrimidine kinase	HMPREF0539_2664	phosphomethylpyrimidine kinase	LRHMDP2_786	Hydroxymethylpyrimidine phosphate kinase ThiD	LRHMDP3_20	Hydroxymethylpyrimidine phosphate kinase ThiD	LC705_00360	phosphomethylpyrimidine kinase	PEL5_1710	Hydroxymethylpyrimidine phosphate kinase ThiD	PEL6_2085	Hydroxymethylpyrimidine phosphate kinase ThiD	R0011_08243	phosphomethylpyrimidine kinase
LGG_00371	amino acid transporter	HMPREF0541_00489	amino acid permease	LRHK_372	amino acid permease family protein	LRHM_0359	amino acid transporter protein	E800_1571	amino acid transporter	LRH_00962	Amino acid transporter	HMPREF0539_2665	APC family amino acid-polyamine-organocation transporter	LRHMDP2_787	amino acid transporter	LRHMDP3_21	amino acid transporter	LC705_00361	amino acid transporter	PEL5_1711	amino acid transporter	PEL6_2084	amino acid transporter	R0011_08248	amino acid transporter
LGG_00372	LacI family transcriptional regulator	HMPREF0541_00490	sugar-binding domain protein	LRHK_374	bacterial regulatory s, lacI family protein	LRHM_0360	ribose operon repressor	E800_1570	Ribose operon repressor	LRH_00957	ribose operon repressor	HMPREF0539_2667	transcriptional regulator	LRHMDP2_789	Ribose operon repressor	LRHMDP3_23	Ribose operon repressor	LC705_00363	transcriptional regulator LacI family	PEL5_1712	Ribose operon repressor	PEL6_2083	Ribose operon repressor	R0011_08253	transcriptional regulator LacI family protein
LGG_00373	ribokinase	HMPREF0541_00496	ribokinase	LRHK_379	ribokinase	LRHM_0362	ribokinase	E800_1564	Ribokinase	LRH_00932	Sugar kinase, ribokinase family protein	HMPREF0539_2672	ribokinase	LRHMDP2_794	Ribokinase	LRHMDP3_28	Ribokinase	LC705_00368	ribokinase	PEL5_1714	Ribokinase	PEL6_2081	Ribokinase	R0011_08278	ribokinase
LGG_00374	transcriptional regulator	HMPREF0541_00497	putative trp operon repressor	LRHK_380	helix-turn-helix family protein	LRHM_0363	putative transcriptional regulator	E800_1563	putative transcriptional regulator	LRH_00927	putative transcriptional regulator	HMPREF0539_2673	probable transcriptional regulator	LRHMDP2_795	putative transcriptional regulator	LRHMDP3_29	putative transcriptional regulator	LC705_00369	transcriptional regulator	PEL5_1715	putative transcriptional regulator	PEL6_2080	putative transcriptional regulator	R0011_08283	transcriptional regulator
LGG_00375	hypothetical protein			LRHK_381	rhomboid family protein	LRHM_0364	hypothetical protein					HMPREF0539_2674	conserved hypothetical protein	LRHMDP2_796	hypothetical protein	LRHMDP3_30	hypothetical protein	LC705_00370	peptidase S54, rhomboid	PEL5_1716	hypothetical protein
LGG_00377	hypothetical protein																	LC705_00371	hypothetical protein
LGG_00378	hypothetical protein			LRHK_383	hypothetical protein							HMPREF0539_2676	hypothetical protein					LC705_00372	hypothetical protein
LGG_00379	hypothetical protein											HMPREF0539_2677	hypothetical protein
LGG_00380	hypothetical protein			LRHK_385	hypothetical protein	LRHM_0366	hypothetical protein					HMPREF0539_2678	hypothetical membrane spanning protein	LRHMDP2_799	FIG00753059: hypothetical protein	LRHMDP3_33	FIG00753059: hypothetical protein	LC705_00374	hypothetical protein	PEL5_1381	FIG00753059: hypothetical protein	PEL6_281	FIG00753059: hypothetical protein
LGG_00381	hypothetical protein			LRHK_1895	hypothetical protein	LRHM_0367	hypothetical protein					HMPREF0539_2557	conserved hypothetical protein					LC705_01897	hypothetical protein	PEL5_1382	FIG00744891: hypothetical protein	PEL6_280	FIG00744891: hypothetical protein
LGG_00382	penicillin-binding protein 3	HMPREF0541_00498	putative penicillin-binding protein 3	LRHK_386	penicillin binding transpeptidase domain protein	LRHM_0368	putative cell division protein	E800_1562	Cell division protein FtsI [Peptidoglycan synthetase]	LRH_00922	Cell division protein FtsI/penicillin-binding protein 2	HMPREF0539_2679	penicillin-binding protein	LRHMDP2_800	Cell division protein FtsI [Peptidoglycan synthetase]	LRHMDP3_34	Cell division protein FtsI [Peptidoglycan synthetase]	LC705_00375	penicillin-binding protein 3	PEL5_1383	Cell division protein FtsI [Peptidoglycan synthetase]	PEL6_279	Cell division protein FtsI [Peptidoglycan synthetase]	R0011_08288	penicillin-binding protein 3
LGG_00384	hypothetical protein					LRHM_0370	hypothetical protein
LGG_00385	hypothetical protein					LRHM_0371	hypothetical protein							LRHMDP2_801	putative transcriptional regulator	LRHMDP3_35	putative transcriptional regulator			PEL5_2485	hypothetical protein	PEL6_1673	hypothetical protein
LGG_00386	transporter major facilitator superfamily MFS_1	HMPREF0541_00504	transporter, major facilitator family protein			LRHM_0372	putative transporter protein	E800_1556	permease of the major facilitator superfamily	LRH_00892	permease of the major facilitator superfamily protein	HMPREF0539_2686	permease of the major facilitator superfamily protein	LRHMDP2_807	permease of the major facilitator superfamily	LRHMDP3_41	permease of the major facilitator superfamily	LC705_00382	MFS superfamily transporter	PEL5_2486	permease of the major facilitator superfamily	PEL6_1672	permease of the major facilitator superfamily	R0011_08318	transporter major facilitator superfamily MFS_1
LGG_00387	MarR family transcriptional regulator	HMPREF0541_00505	transcriptional regulator, MarR family	LRHK_394	marR family protein	LRHM_0373	transcriptional regulator	E800_1555	Transcriptional regulator, MarR family	LRH_00887	Transcriptional regulator	HMPREF0539_2687	transcriptional regulator	LRHMDP2_808	Transcriptional regulator, MarR family	LRHMDP3_42	Transcriptional regulator, MarR family	LC705_00383	MarR family transcriptional regulator	PEL5_2487	Transcriptional regulator, MarR family	PEL6_1671	Transcriptional regulator, MarR family	R0011_08323	MarR family transcriptional regulator
LGG_00388	hypothetical protein	HMPREF0541_00506	hypothetical protein	LRHK_395	hypothetical protein	LRHM_0374	hypothetical protein	E800_1554	FIG00743730: hypothetical protein	LRH_00882	hypothetical protein	HMPREF0539_2688	conserved hypothetical protein	LRHMDP2_809	FIG00743730: hypothetical protein	LRHMDP3_43	FIG00743730: hypothetical protein	LC705_00384	hypothetical protein	PEL5_2488	FIG00743730: hypothetical protein	PEL6_1670	FIG00743730: hypothetical protein	R0011_08328	hypothetical protein
LGG_00389	hypothetical protein	HMPREF0541_00507	hypothetical protein	LRHK_396	hypothetical protein	LRHM_0375	hypothetical protein	E800_1553	FIG00750795: hypothetical protein	LRH_00877	hypothetical protein	HMPREF0539_2689	conserved hypothetical protein	LRHMDP2_810	FIG00750795: hypothetical protein	LRHMDP3_44	FIG00750795: hypothetical protein	LC705_00385	hypothetical protein	PEL5_2489	FIG00750795: hypothetical protein	PEL6_1669	FIG00750795: hypothetical protein	R0011_08333	hypothetical protein
LGG_00390	hypothetical protein	HMPREF0541_00508	DNA-binding helix-turn-helix protein	LRHK_397	hypothetical protein	LRHM_0376	hypothetical protein	E800_1552	hypothetical protein	LRH_00867	hypothetical protein									PEL5_2490	hypothetical protein	PEL6_1668	hypothetical protein	R0011_08338	hypothetical protein
LGG_00391	hypothetical protein					LRHM_0377	hypothetical protein							LRHMDP2_811	hypothetical protein	LRHMDP3_45	hypothetical protein			PEL5_2491	hypothetical protein	PEL6_1667	hypothetical protein
LGG_00392	hypothetical protein					LRHM_0378	hypothetical protein							LRHMDP2_812	hypothetical protein	LRHMDP3_46	hypothetical protein			PEL5_2492	hypothetical protein	PEL6_1666	hypothetical protein
LGG_00393	transcription antiterminator BglG family protein	HMPREF0541_00565	PRD domain protein	LRHK_460	PTS system, Lactose/Cellobiose specific IIB subunit	LRHM_0379	transcriptional regulator	E800_287	Transcription antiterminator, BglG family	LRH_10772	DNA-binding/PRD domain protein	HMPREF0539_2753	BglG family transcriptional antiterminator	LRHMDP2_813	Transcriptional antiterminator of lichenan operon, BglG family	LRHMDP3_47	Transcriptional antiterminator of lichenan operon, BglG family	LC705_00447	BglG family transcription antiterminator	PEL5_2493	Transcriptional antiterminator of lichenan operon, BglG family	PEL6_1665	Transcriptional antiterminator of lichenan operon, BglG family	R0011_08628	BglG family transcription antiterminator
LGG_00394	PTS system transporter subunit IIA					LRHM_0380	PTS system transporter subunit IIA													PEL5_2494	hypothetical protein	PEL6_1664	hypothetical protein
LGG_00395	PTS system fructose-specific transporter subunit IIA	HMPREF0541_00568	phosphoenolpyruvate-dependent sugar phosphotransferase system, EIIA 2	LRHK_463	PTS system, fructose subfamily, IIA component domain protein	LRHM_0381	PTS system transporter subunit IIA	E800_284	PTS system, fructose-specific IIA component	LRH_10787	PTS system, IIA component	HMPREF0539_2756	PTS family porter component IIA	LRHMDP2_814	PTS system, fructose-specific IIA component	LRHMDP3_48	PTS system, fructose-specific IIA component	LC705_00450	PTS system fructose-specific transporter subunit IIA	PEL5_2495	PTS system, fructose-specific IIA component	PEL6_1663	PTS system, fructose-specific IIA component	R0011_08643	PTS system fructose-specific transporter subunit IIA
LGG_00396	PTS system fructose-specific transporter subunit IIB	HMPREF0541_00569	putative fructose-like phosphotransferase enzyme IIB component 2	LRHK_464	fructose-like phosphotransferase enzyme IIB component 2	LRHM_0382	PTS system IIB component	E800_283	PTS system, IIB component	LRH_10792	PTS system, fructose-specific, IIB component	HMPREF0539_2757	protein-N(pi)-phosphohistidine--sugar phosphotransferase	LRHMDP2_815	PTS system, fructose-specific IIA component / PTS system, fructose-specific IIB component / PTS system, fructose-specific IIC component	LRHMDP3_49	PTS system, fructose-specific IIA component / PTS system, fructose-specific IIB component / PTS system, fructose-specific IIC component	LC705_00451	PTS system fructose-specific transporter subunit IIB	PEL5_2496	PTS system, fructose-specific IIA component / PTS system, fructose-specific IIB component / PTS system, fructose-specific IIC component	PEL6_1662	PTS system, fructose-specific IIA component / PTS system, fructose-specific IIB component / PTS system, fructose-specific IIC component	R0011_08648	PTS system, IIB component
LGG_00397	PTS system fructose-specific transporter subunit IIC	HMPREF0541_00570	phosphotransferase system, EIIC	LRHK_465	PTS system, Fru family, IIC component domain protein	LRHM_0383	PTS system IIC component	E800_282	PTS system, fructose-specific IIBC component	LRH_10797	PTS system, fructose-specific, IIC component	HMPREF0539_2758	PTS family porter component IIC	LRHMDP2_816	PTS system, fructose-specific IIA component / PTS system, fructose-specific IIB component / PTS system, fructose-specific IIC component	LRHMDP3_50	PTS system, fructose-specific IIA component / PTS system, fructose-specific IIB component / PTS system, fructose-specific IIC component	LC705_00452	PTS system fructose-specific transporter subunit IIC	PEL5_2497	PTS system, fructose-specific IIA component / PTS system, fructose-specific IIB component / PTS system, fructose-specific IIC component	PEL6_1661	PTS system, fructose-specific IIA component / PTS system, fructose-specific IIB component / PTS system, fructose-specific IIC component	R0011_08653	PTS system, IIC component
LGG_00398	transaldolase					LRHM_0384	putative transaldolase							LRHMDP2_817	Transaldolase	LRHMDP3_51	Transaldolase			PEL5_2498	Transaldolase	PEL6_1660	Transaldolase
LGG_00399	allulose-6-phosphate 3-epimerase					LRHM_0385	allulose-6-phosphate 3-epimerase							LRHMDP2_818	Ribulose-phosphate 3-epimerase	LRHMDP3_52	Ribulose-phosphate 3-epimerase			PEL5_2499	Ribulose-phosphate 3-epimerase	PEL6_1659	Ribulose-phosphate 3-epimerase
LGG_00400	PTS system lactose/cellobiose-specific transporter subunit IIA					LRHM_0386	truncated transcriptional antiterminator			LRH_09930	Phosphotransferase system mannitol/fructose-specific IIA domain, putative			LRHMDP2_819	transcriptional antiterminator, BglG family	LRHMDP3_53	transcriptional antiterminator, BglG family			PEL5_2500	Predicted galactitol operon regulator (Transcriptional antiterminator), BglG family / PTS system, mannitol/fructose-specific IIA component	PEL6_1658	transcriptional antiterminator, BglG family
LGG_00401	PTS system lactose/cellobiose-specific transporter subunit IIB subunit					LRHM_0387	putative PTS system IIB component							LRHMDP2_820	FIG00629163: hypothetical protein	LRHMDP3_54	FIG00629163: hypothetical protein			PEL5_2501	FIG00629163: hypothetical protein	PEL6_1657	FIG00629163: hypothetical protein
LGG_00402	PTS system transporter subunit IIC					LRHM_0388	truncated PTS system IIC component
LGG_00404	PTS system ascorbate-specific transporter subunit IIC					LRHM_0390	truncated PTS system IIC component							LRHMDP2_821	Putative integral membrane protein	LRHMDP3_55	Putative integral membrane protein			PEL5_2131	Putative integral membrane protein	PEL6_1685	Putative integral membrane protein
LGG_00405	transketolase					LRHM_0391	putative transketolase							LRHMDP2_822	Transketolase, N-terminal section	LRHMDP3_56	Transketolase, N-terminal section			PEL5_2130	Transketolase, N-terminal section	PEL6_1684	Transketolase, N-terminal section
LGG_00406	transketolase					LRHM_0392	putative transketolase							LRHMDP2_823	Transketolase, C-terminal section	LRHMDP3_57	Transketolase, C-terminal section			PEL5_2129	Transketolase, C-terminal section	PEL6_1683	Transketolase, C-terminal section
LGG_00407	fructokinase					LRHM_0393	fructokinase							LRHMDP2_824	Fructokinase	LRHMDP3_58	Fructokinase			PEL5_2128	Fructokinase	PEL6_1682	Fructokinase
LGG_00408	lactose phosphotransferase system repressor	HMPREF0541_00550	transcriptional regulator, DeoR family	LRHK_442	bacterial regulatory s, deoR family protein	LRHM_0394	transcriptional regulator	E800_302	Transcriptional regulator of sugar metabolism	LRH_00652	lactose phosphotransferase system repressor	HMPREF0539_2735	DeoR family transcriptional regulator	LRHMDP2_825	Lactose phosphotransferase system repressor	LRHMDP3_59	Lactose phosphotransferase system repressor	LC705_00429	lactose phosphotransferase system repressor	PEL5_2127	Lactose phosphotransferase system repressor	PEL6_1681	Lactose phosphotransferase system repressor	R0011_08553	lactose phosphotransferase system repressor
LGG_00409	PTS system fructose-specific transporter subunit IIA					LRHM_0395	PTS system cellobiose-specific transporter subunit IIA							LRHMDP2_826	PTS system, fructose-specific IIA component( EC:2.7.1.69 )	LRHMDP3_60	PTS system, fructose-specific IIA component( EC:2.7.1.69 )			PEL5_2126	hypothetical protein	PEL6_1680	hypothetical protein
LGG_00410	PTS system fructose-specific transporter subunit IIB					LRHM_0396	PTS system fructose-specific IIB component							LRHMDP2_827	PTS system, fructose-specific IIB component	LRHMDP3_61	PTS system, fructose-specific IIB component			PEL5_2125	PTS system, fructose-specific IIB component	PEL6_1679	PTS system, fructose-specific IIB component
LGG_00411	PTS system fructose-specific transporter subunit IIC					LRHM_0397	PTS system fructose-specific IIC component							LRHMDP2_828	PTS system, fructose-specific IIBC component	LRHMDP3_62	PTS system, fructose-specific IIBC component			PEL5_2124	PTS system, fructose-specific IIBC component	PEL6_1678	PTS system, fructose-specific IIBC component
LGG_00413	fructose-bisphosphate aldolase					LRHM_0399	fructose-bisphosphate aldolase							LRHMDP2_829	Tagatose 1,6-bisphosphate aldolase	LRHMDP3_63	Tagatose 1,6-bisphosphate aldolase
LGG_00414	fructose-bisphosphate aldolase	HMPREF0541_00527	ketose-bisphosphate aldolase	LRHK_416	ketose-bisphosphate aldolases family protein	LRHM_0400	fructose-bisphosphate aldolase	E800_285	Fructose-bisphosphate aldolase class II	LRH_00767	hypothetical protein	HMPREF0539_2708	possible fructose-bisphosphate aldolase	LRHMDP2_830	Fructose-bisphosphate aldolase class II	LRHMDP3_64	Fructose-bisphosphate aldolase class II	LC705_00403	hypothetical protein					R0011_08438	hypothetical protein
LGG_00415	PTS system mannose-specific transporter subunit IIB					LRHM_0401	putative PTS system IIB component							LRHMDP2_831	PTS system, mannose-specific IIB component	LRHMDP3_65	PTS system, mannose-specific IIB component
LGG_00416	PTS system mannose-specific transporter subunit IIA					LRHM_0402	putative PTS system IIA component
LGG_00417	PTS system mannose-specific transporter subunit IICD					LRHM_0403	putative PTS system IICD components							LRHMDP2_832	PTS system, sorbose-specific IID component	LRHMDP3_66	PTS system, sorbose-specific IID component
LGG_00418	translaldolase					LRHM_0404	transaldolase							LRHMDP2_833	Transaldolase	LRHMDP3_67	Transaldolase
LGG_00419	LacI family transcriptional regulator					LRHM_0405	transcriptional regulator							LRHMDP2_834	Transcriptional regulator of D-allose utilization, LacI family	LRHMDP3_68	Transcriptional regulator of D-allose utilization, LacI family
LGG_00420	GntR family transcriptional regulator					LRHM_0406	hypothetical protein							LRHMDP2_849	Hypothetical protein YhfZ	LRHMDP3_83	Hypothetical protein YhfZ
LGG_00421	hypothetical protein					LRHM_0407	hypothetical protein							LRHMDP2_850	Protein containing PTS-regulatory domain	LRHMDP3_84	Protein containing PTS-regulatory domain
LGG_00422	hypothetical protein					LRHM_0408	hypothetical protein							LRHMDP2_851	FIG128630: Hypothetical protein	LRHMDP3_85	FIG128630: Hypothetical protein
LGG_00423	membrane protein					LRHM_0409	hypothetical protein							LRHMDP2_852	FIG006427: Putative transport system permease protein	LRHMDP3_86	FIG006427: Putative transport system permease protein
LGG_00424	hydrolase					LRHM_0410	putative hydrolase							LRHMDP2_853	Phosphotriesterase like protein	LRHMDP3_87	Phosphotriesterase like protein
LGG_00425	pyridoxal phosphate-dependent transferase					LRHM_0411	hypothetical protein							LRHMDP2_854	Aspartate aminotransferase family	LRHMDP3_88	Aspartate aminotransferase family
LGG_00426	amino acid racemase					LRHM_0412	putative amino acid racemase							LRHMDP2_855	Protein containing an Alanine Racemase Domain	LRHMDP3_89	Protein containing an Alanine Racemase Domain
LGG_00427	mutase					LRHM_0413	phosphopentomutase							LRHMDP2_856	Phosphopentomutase like	LRHMDP3_90	Phosphopentomutase like
LGG_00428	DNA-directed RNA polymerase subunit delta	HMPREF0541_00537	hypothetical protein	LRHK_429	S-adenosyl-l-methionine hydroxide adenosyltransferase family protein	LRHM_0414	hypothetical protein	E800_3041	hypothetical protein	LRH_00717	hypothetical protein	HMPREF0539_2721	protein of hypothetical function DUF62	LRHMDP2_857	hypothetical protein	LRHMDP3_91	hypothetical protein	LC705_00416	DNA-directed RNA polymerase subunit delta					R0011_08488	DNA-directed RNA polymerase subunit delta
LGG_00429	hypothetical protein	HMPREF0541_00538	hypothetical protein	LRHK_430	hypothetical protein	LRHM_0415	hypothetical protein	E800_3042	Substrate-specific component MtsA of methionine-regulated ECF transporter	LRH_00712	hypothetical protein	HMPREF0539_2722	membrane protein	LRHMDP2_858	Substrate-specific component MtsA of methionine-regulated ECF transporter	LRHMDP3_92	Substrate-specific component MtsA of methionine-regulated ECF transporter	LC705_00417	hypothetical protein					R0011_08493	hypothetical protein
LGG_00430	cobalt ABC transporter ATP-binding protein cbiO	HMPREF0541_00539	ABC transporter, ATP-binding protein	LRHK_431	heme ABC transporter ATP-binding protein CcmA	LRHM_0416	ABC transporter ATP-binding protein	E800_3043	Duplicated ATPase component MtsB of energizing module of methionine-regulated ECF transporter	LRH_00707	ABC transporter, ATP-binding protein	HMPREF0539_2723	ABC superfamily ATP binding cassette transporter, ABC protein	LRHMDP2_859	Duplicated ATPase component MtsB of energizing module of methionine-regulated ECF transporter	LRHMDP3_93	Duplicated ATPase component MtsB of energizing module of methionine-regulated ECF transporter	LC705_00418	cobalt ABC transporter ATPase CbiO					R0011_08498	cobalt ABC transporter ATPase CbiO
LGG_00431	cobalt transport protein cbiQ	HMPREF0541_00540	cobalt transport protein	LRHK_432	cobalt transport family protein	LRHM_0417	ABC transporter permease	E800_3044	Transmembrane component MtsC of energizing module of methionine-regulated ECF transporter	LRH_00702	ABC transporter, permease protein	HMPREF0539_2724	cobalt (Co2+) ABC superfamily ATP binding cassette transporter, membrane protein	LRHMDP2_860	Transmembrane component MtsC of energizing module of methionine-regulated ECF transporter	LRHMDP3_94	Transmembrane component MtsC of energizing module of methionine-regulated ECF transporter	LC705_00419	Cobalt transport protein cbiQ					R0011_08503	Cobalt transport protein cbiQ
LGG_00432	hypothetical protein
LGG_00433	N-acylamino acid racemase					LRHM_0418	N-acylamino acid racemase							LRHMDP2_861	O-succinylbenzoate synthase	LRHMDP3_95	O-succinylbenzoate synthase
LGG_00434	beta-N-acetylhexosaminidase (GH3)					LRHM_0419	beta-N-acetylglucosaminidase	E800_1341	Beta-hexosaminidase
LGG_00435	transposase IS30 family protein					LRHM_0420	transposase	E800_1340	Mobile element protein
LGG_00436	resolvase					LRHM_0421	putative recombinase	E800_1339	Site-specific recombinase, DNA invertase Pin related protein			HMPREF0539_3101	Sin recombinase	LRHMDP2_1332	putative resolvase	LRHMDP3_2628	putative resolvase
LGG_00437	cytosolic protein					LRHM_0422	hypothetical protein	E800_1338	hypothetical protein			HMPREF0539_3100	hypothetical cytosolic protein
LGG_00438	hypothetical protein			LRHK_2629	hypothetical protein
LGG_00439	hypothetical protein					LRHM_0423	hypothetical protein					HMPREF0539_0046	conserved hypothetical protein
LGG_00440	hypothetical protein					LRHM_0424	favin-nucleotide-binding protein					HMPREF0539_0047	flavin-nucleotide-binding protein structurally involved in to pyridoxine 5'-phosphate oxidase
LGG_00441	sortase family protein					LRHM_0425	sortase	E800_218	Sortase A, LPXTG specific			HMPREF0539_0005	sortase
LGG_00442	pilus specific protein					LRHM_0426	hypothetical protein	E800_217	Surface protein from Gram-positive cocci, anchor region			HMPREF0539_0006	Fimbriae subunit protein
LGG_00443	pilus specific protein					LRHM_0427	hypothetical protein	E800_216	Orf2 protein			HMPREF0539_0007	Bee2 protein
LGG_00444	pilus specific protein					LRHM_0428	putative cell surface protein	E800_215	Cell wall surface anchor family protein, FPXTG motif			HMPREF0539_0008	probable yvcC protein
LGG_00446	hypothetical protein					LRHM_0430	hypothetical protein													PEL5_1851	FIG00746938: hypothetical protein
LGG_00447	hypothetical protein					LRHM_0431	hypothetical protein													PEL5_1852	FIG00743498: hypothetical protein
LGG_00448	hypothetical protein					LRHM_0432	hypothetical protein													PEL5_1853	FIG00743498: hypothetical protein
LGG_00449	UvrD/REP helicase					LRHM_0433	hypothetical protein													PEL5_1854	ATP-dependent DNA helicase UvrD/PcrA
LGG_00450	hypothetical protein					LRHM_0434	hypothetical protein													PEL5_1855	FIG131328: Predicted ATP-dependent endonuclease of the OLD family
LGG_00452	transposase IS3/IS911 family protein					LRHM_0436	putative transposase	E800_2211	Transposase											PEL5_2150	Mobile element protein
LGG_00453	transposase IS150/IS3 family protein					LRHM_0437	transposase	E800_2210	Mobile element protein			HMPREF0539_3138	integrase							PEL5_2149	putative transposase B
LGG_00454	transposase IS150/IS3 family protein					LRHM_0438	transposase													PEL5_2148	Mobile element protein
LGG_00455	hypothetical protein					LRHM_0439	hypothetical protein			LRH_03463	hypothetical protein	HMPREF0539_0052	conserved hypothetical protein							PEL5_2147	hypothetical protein
LGG_00456	cation-transporting ATPase					LRHM_0440	cation-transporting ATPase			LRH_03458	cation-transporting ATPase, E1-E2 family protein	HMPREF0539_0051	E1-E2 family cation-transporting ATPase							PEL5_2146	cation-transporting ATPase, E1-E2 family
LGG_00457	transposase					LRHM_0441	putative transposase
LGG_00458	transposase IS4 family protein					LRHM_0442	putative transposase													PEL5_2143	Mobile element protein
LGG_00459	Na/H antiporter					LRHM_0443	Na+/H+ antiporter	E800_2228	Na(+)/H(+) antiporter	LRH_11062	Na+/H+ antiporter									PEL5_2144	Na(+)/H(+) antiporter
LGG_00462	transposase			LRHK_2628	transposase IS66 family protein	LRHM_0446	transposase	E800_2470	transposase	LRH_03036	Transposase	HMPREF0539_3144	IS431mec transposase							PEL5_2142	Mobile element protein
LGG_00463	chloride channel protein					LRHM_0447	chloride channel protein													PEL5_2141	Chloride channel protein
LGG_00464	transposase IS30 family protein			LRHK_2626	integrase core domain-containing protein	LRHM_0448	transposase	E800_317	Mobile element protein			HMPREF0539_3139	transposase PrcB							PEL5_2140	Mobile element protein
LGG_00465	transporter major facilitator superfamily MFS_1					LRHM_0449	putative transporter protein							LRHMDP2_862	major facilitator family transporter	LRHMDP3_96	major facilitator family transporter			PEL5_2139	major facilitator family transporter
LGG_00467	peptidase M20					LRHM_0451	putative peptidase							LRHMDP2_863	peptidase M20	LRHMDP3_97	peptidase M20
LGG_00468	LysR family transcriptional regulator					LRHM_0452	putative transcriptional regulator							LRHMDP2_864	regulatory protein, LysR:LysR, substrate-binding	LRHMDP3_98	regulatory protein, LysR:LysR, substrate-binding			PEL5_991	transcriptional regulator, LysR family	PEL6_130	transcriptional regulator, LysR family
LGG_00469	hypothetical protein					LRHM_0453	hypothetical protein													PEL5_990	hypothetical protein	PEL6_131	hypothetical protein
LGG_00470	cryptic beta-D-galactosidase subunit alpha					LRHM_0454	beta-galactosidase							LRHMDP2_865	Evolved beta-D-galactosidase, alpha subunit	LRHMDP3_99	Evolved beta-D-galactosidase, alpha subunit			PEL5_989	Evolved beta-D-galactosidase, alpha subunit	PEL6_132	Evolved beta-D-galactosidase, alpha subunit
LGG_00471	amino acid permease family protein					LRHM_0455	amino acid transporter protein							LRHMDP2_866	Putative oxidoreductase	LRHMDP3_100	Putative oxidoreductase			PEL5_988	Putative oxidoreductase	PEL6_133	Putative oxidoreductase
LGG_00472	Lysine-specific permease					LRHM_0456	lysine transporter protein							LRHMDP2_867	Lysine-specific permease	LRHMDP3_101	Lysine-specific permease			PEL5_987	Lysine-specific permease	PEL6_134	Lysine-specific permease
LGG_00473	AraC family transcriptional regulator					LRHM_0457	putative transcriptional regulator							LRHMDP2_868	hypothetical protein	LRHMDP3_102	hypothetical protein			PEL5_986	hypothetical protein	PEL6_135	hypothetical protein
LGG_00474	hypothetical protein					LRHM_0458	putative transcriptional regulator							LRHMDP2_869	hypothetical protein	LRHMDP3_103	hypothetical protein			PEL5_985	Transcriptional regulator, AraC family # frameshift	PEL6_136	hypothetical protein
LGG_00475	transporter major facilitator superfamily MFS_1					LRHM_0459	putative transporter protein							LRHMDP2_870	hypothetical protein	LRHMDP3_104	hypothetical protein			PEL5_984	PROBABLE TRANSPORT TRANSMEMBRANE PROTEIN	PEL6_137	PROBABLE TRANSPORT TRANSMEMBRANE PROTEIN
LGG_00476	aminobenzoyl-glutamate utilization protein B					LRHM_0460	amidohydrolase							LRHMDP2_871	Catalyzes the cleavage of p-aminobenzoyl-glutamate to p-aminobenzoate and glutamate, subunit B	LRHMDP3_105	Catalyzes the cleavage of p-aminobenzoyl-glutamate to p-aminobenzoate and glutamate, subunit B			PEL5_983	Catalyzes the cleavage of p-aminobenzoyl-glutamate to p-aminobenzoate and glutamate, subunit B	PEL6_138	Catalyzes the cleavage of p-aminobenzoyl-glutamate to p-aminobenzoate and glutamate, subunit B
LGG_00477	opine/octopine dehydrogenase					LRHM_0461	NAD/NADP octopine/nopaline dehydrogenase													PEL5_982	FIG00746973: hypothetical protein	PEL6_139	FIG00746973: hypothetical protein
LGG_00478	amino acid ABC transporter ATP-binding protein					LRHM_0462	amino acid ABC transporter ATP-binding protein													PEL5_981	putative amino acid ABC transporter, ATP-binding protein	PEL6_140	putative amino acid ABC transporter, ATP-binding protein
LGG_00479	amino acid ABC transporter substrate-binding protein					LRHM_0463	amino acid ABC transporter substrate-binding protein													PEL5_980	FIG01116301: hypothetical protein	PEL6_141	FIG01116301: hypothetical protein
LGG_00480	amino acid ABC transporter permease					LRHM_0464	amino acid ABC transporter permease component													PEL5_979	FIG00745049: hypothetical protein	PEL6_142	FIG00745049: hypothetical protein
LGG_00481	amino acid ABC transporter permease					LRHM_0465	amino acid ABC transporter permease component													PEL5_978	putative amino acid ABC transporter, permease protein	PEL6_143	putative amino acid ABC transporter, permease protein
LGG_00482	hypothetical protein	HMPREF0541_00587	hypothetical protein	LRHK_486	hypothetical protein	LRHM_0466	hypothetical protein	E800_265	hypothetical protein	LRH_10882	hypothetical protein	HMPREF0539_2779	conserved hypothetical protein	LRHMDP2_873	hypothetical protein	LRHMDP3_107	hypothetical protein	LC705_00473	hypothetical protein	PEL5_977	hypothetical protein	PEL6_144	hypothetical protein	R0011_08738	hypothetical protein
LGG_00483	hypothetical protein							E800_264	Alpha-galactosidase					LRHMDP2_874	Alpha-galactosidase	LRHMDP3_108	Alpha-galactosidase			PEL5_976	Malolactic regulator	PEL6_145	Malolactic regulator
LGG_00484	DNA-directed RNA polymerase specialized sigma subunit, sigma24-like protein	HMPREF0541_00588	RNA polymerase sigma factor, sigma-70 family	LRHK_488	bacterial regulatory s, luxR family protein	LRHM_0467	hypothetical protein	E800_263	DNA-directed RNA polymerase specialized sigma subunit, sigma24-like	LRH_10887	DNA-directed RNA polymerase specialized sigma subunit, sigma24-like protein	HMPREF0539_2780	sigma24 family DNA-directed RNA polymerase specialized sigma subunit	LRHMDP2_875	DNA-directed RNA polymerase specialized sigma subunit, sigma24-like	LRHMDP3_109	DNA-directed RNA polymerase specialized sigma subunit, sigma24-like	LC705_00474	DNA-directed RNA polymerase specialized sigma subunit, sigma24-like protein	PEL5_975	DNA-directed RNA polymerase specialized sigma subunit, sigma24-like	PEL6_146	DNA-directed RNA polymerase specialized sigma subunit, sigma24-like	R0011_08743	DNA-directed RNA polymerase specialized sigma subunit, sigma24-like protein
LGG_00485	hypothetical protein	HMPREF0541_00589	hypothetical protein	LRHK_489	yvrJ family protein	LRHM_0468	hypothetical protein	E800_262	FIG00749640: hypothetical protein	LRH_10892	hypothetical protein	HMPREF0539_2781	conserved hypothetical protein	LRHMDP2_876	FIG00749640: hypothetical protein	LRHMDP3_110	FIG00749640: hypothetical protein	LC705_00475	hypothetical protein	PEL5_974	FIG00749640: hypothetical protein	PEL6_147	FIG00749640: hypothetical protein	R0011_08748	hypothetical protein
LGG_00486	lyzozyme M1	HMPREF0541_00590	glycosyl hydrolase family 25	LRHK_490	lysM domain protein	LRHM_0469	lyzozyme	E800_261	N-acetylmuramoyl-L-alanine amidase	LRH_10897	Lyzozyme M1 (1,4-beta-N-acetylmuramidase)	HMPREF0539_2782	autolysin	LRHMDP2_877	N-acetylmuramoyl-L-alanine amidase	LRHMDP3_111	N-acetylmuramoyl-L-alanine amidase	LC705_00476	lyzozyme M1	PEL5_973	N-acetylmuramoyl-L-alanine amidase	PEL6_148	N-acetylmuramoyl-L-alanine amidase	R0011_08753	lyzozyme M1
LGG_00487	hypothetical protein					LRHM_0470	hypothetical protein													PEL5_972	FIG00749233: hypothetical protein	PEL6_149	FIG00749233: hypothetical protein
LGG_00488	TetR family transcriptional regulator	HMPREF0541_00591	transcriptional regulator, TetR family	LRHK_491	bacterial regulatory s, tetR family protein	LRHM_0471	transcriptional regulator	E800_260	Transcriptional regulator, TetR family	LRH_10902	Transcriptional regulator	HMPREF0539_2783	transcriptional regulator	LRHMDP2_878	Transcriptional regulator, TetR family	LRHMDP3_112	Transcriptional regulator, TetR family	LC705_00477	TetR family transcriptional regulator	PEL5_971	Transcriptional regulator, TetR family	PEL6_150	Transcriptional regulator, TetR family	R0011_08758	transcriptional regulator tetR family protein
LGG_00489	antimicrobial peptide ABC transporter permease	HMPREF0541_00592	efflux ABC transporter, permease protein	LRHK_492	ftsX-like permease family protein	LRHM_0472	antimicrobial peptide ABC transporter permease component	E800_259	ABC transporter permease component	LRH_10907	ABC-type antimicrobial peptide transport system, permease component	HMPREF0539_2784	ABC superfamily ATP binding cassette transporter, membrane protein	LRHMDP2_879	ABC transporter permease component	LRHMDP3_113	ABC transporter permease component	LC705_00478	antimicrobial peptide ABC transporter permease	PEL5_970	ABC transporter permease component	PEL6_151	ABC transporter permease component	R0011_08763	antimicrobial peptide ABC transporter permease
LGG_00490	ABC transporter ATP-binding protein	HMPREF0541_00593	putative lipoprotein releasing system, ATP-binding protein	LRHK_493	ABC transporter family protein	LRHM_0473	antimicrobial peptide ABC transporter ATP-binding component	E800_258	ABC transporter ATP-binding protein	LRH_10912	ABC-type antimicrobial peptide transport system, ATPase component	HMPREF0539_2785	ABC superfamily ATP binding cassette transporter, ABC protein	LRHMDP2_880	ABC transporter ATP-binding protein	LRHMDP3_114	ABC transporter ATP-binding protein	LC705_00479	ABC transporter ATPase	PEL5_969	ABC transporter ATP-binding protein	PEL6_152	ABC transporter ATP-binding protein	R0011_08768	ABC transporter ATP-binding protein
LGG_00491	NADH peroxidase	HMPREF0541_00595	putative NADH peroxidase	LRHK_494	NADH peroxidase	LRHM_0475	NAD(FAD)-dependent dehydrogenase	E800_256	NADH peroxidase Npx	LRH_10917	Uncharacterized NAD(FAD)-dependent dehydrogenase	HMPREF0539_2786	NADH peroxidase	LRHMDP2_882	NADH peroxidase Npx	LRHMDP3_116	NADH peroxidase Npx	LC705_00480	NADH peroxidase	PEL5_967	NADH peroxidase Npx	PEL6_154	NADH peroxidase Npx	R0011_08773	NADH peroxidase
LGG_00492	hydrolase of the HAD superfamily	HMPREF0541_00596	Cof-like hydrolase	LRHK_495	HAD hydrolase	LRHM_0476	hydrolase	E800_255	Hydrolase (HAD superfamily)	LRH_10922	Predicted hydrolase of the HAD superfamily protein	HMPREF0539_2787	HAD superfamily hydrolase	LRHMDP2_883	Hydrolase (HAD superfamily)	LRHMDP3_117	Hydrolase (HAD superfamily)	LC705_00481	HAD superfamily hydrolase	PEL5_966	Hydrolase (HAD superfamily)	PEL6_155	Hydrolase (HAD superfamily)	R0011_08778	HAD superfamily hydrolase
LGG_00493	hypothetical protein	HMPREF0541_00597	addiction module toxin, RelE/StbE family	LRHK_496	RelE/StbE family addiction module toxin	LRHM_0477	hypothetical protein	E800_254	FIG00743005: hypothetical protein	LRH_10927	hypothetical protein	HMPREF0539_2788	conserved hypothetical protein	LRHMDP2_884	FIG00743005: hypothetical protein	LRHMDP3_118	FIG00743005: hypothetical protein	LC705_00482	hypothetical protein	PEL5_965	FIG00743005: hypothetical protein	PEL6_156	FIG00743005: hypothetical protein	R0011_08783	hypothetical protein
LGG_00494	nucleotidyltransferase	HMPREF0541_00598	hypothetical protein	LRHK_505	nucleotidyltransferase domain protein	LRHM_0478	adenylyl transferase	E800_253	Predicted nucleotidyltransferase	LRH_10937	Predicted nucleotidyltransferase	HMPREF0539_2797	streptomycin 3''-adenylyltransferase	LRHMDP2_893	Predicted nucleotidyltransferase	LRHMDP3_127	Predicted nucleotidyltransferase	LC705_00490	nucleotidyltransferase	PEL5_964	Predicted nucleotidyltransferase	PEL6_157	Predicted nucleotidyltransferase	R0011_08788	nucleotidyltransferase
LGG_00495	hypothetical protein	HMPREF0541_00600	hypothetical protein	LRHK_507	hypothetical protein	LRHM_0480	hypothetical protein	E800_251	hypothetical protein	LRH_10947	hypothetical protein	HMPREF0539_2799	conserved hypothetical protein	LRHMDP2_895	hypothetical protein	LRHMDP3_129	hypothetical protein	LC705_00491	hypothetical protein	PEL5_962	hypothetical protein	PEL6_159	hypothetical protein	R0011_08798	hypothetical protein
LGG_00496	hypothetical protein													LRHMDP2_896	hypothetical protein	LRHMDP3_130	hypothetical protein			PEL5_961	hypothetical protein	PEL6_160	hypothetical protein
LGG_00497	hypothetical protein	HMPREF0541_00601	hypothetical protein			LRHM_0481	hypothetical protein	E800_250	hypothetical protein	LRH_10952	hypothetical protein									PEL5_960	hypothetical protein	PEL6_161	hypothetical protein	R0011_08803	hypothetical protein
LGG_00498	hypothetical protein									LRH_10957	hypothetical protein			LRHMDP2_897	FIG00742620: hypothetical protein	LRHMDP3_131	FIG00742620: hypothetical protein					PEL6_162	hypothetical protein
LGG_00500	ABC transporter metal ion transporter periplasmic component/surface antigen	HMPREF0541_00044	NLPA lipoprotein	LRHK_508	NLPA lipofamily protein	LRHM_0483	metal ion ABC transporter substrate binding component	E800_246	Methionine ABC transporter substrate-binding protein	LRH_10982	ABC-type metal ion transport system, periplasmic component/surface antigen	HMPREF0539_2801	ABC superfamily ATP binding cassette transporter, binding protein					LC705_00492	metal ion ABC transporter periplasmic protein/surface antigen	PEL5_372	Methionine ABC transporter substrate-binding protein	PEL6_2373	Methionine ABC transporter substrate-binding protein	R0011_08828	metal ion ABC transporter periplasmic protein/surface antigen
LGG_00501	choloylglycine hydrolase	HMPREF0541_00045	linear amide C-N hydrolase, choloylglycine hydrolase family protein	LRHK_509	linear amide C-N hydrolase, choloylglycine hydrolase family protein	LRHM_0484	putative conjugated bile salt hydrolase	E800_245	Conjugated bile salt hydrolase related amidase	LRH_10987	Conjugated bile salt hydrolase related amidase	HMPREF0539_2802	possible choloylglycine hydrolase	LRHMDP2_898	Conjugated bile salt hydrolase related amidase	LRHMDP3_2615	Conjugated bile salt hydrolase related amidase	LC705_00493	choloylglycine hydrolase	PEL5_373	Conjugated bile salt hydrolase related amidase	PEL6_2374	Conjugated bile salt hydrolase related amidase	R0011_08833	choloylglycine hydrolase
LGG_00502	hypothetical protein	HMPREF0541_00046	hypothetical protein	LRHK_510	hypothetical protein	LRHM_0485	hypothetical protein	E800_244	FIG00742620: hypothetical protein	LRH_10992	hypothetical protein	HMPREF0539_2803	conserved hypothetical protein	LRHMDP2_899	FIG00742620: hypothetical protein	LRHMDP3_2614	FIG00742620: hypothetical protein	LC705_00494	hypothetical protein	PEL5_374	FIG00742620: hypothetical protein	PEL6_2375	FIG00742620: hypothetical protein	R0011_08838	hypothetical protein
LGG_00503	myosin-cross-reactive antigen	HMPREF0541_00047	hypothetical protein	LRHK_511	streptococcal 67 kDa myosin-cross-reactive antigen like family protein	LRHM_0486	hypothetical protein	E800_243	Predicted oxidoreductase; Myosin-crossreactive antigen ortholog	LRH_10997	Predicted oxidoreductase	HMPREF0539_2804	myosin-cross-reactive antigen protein	LRHMDP2_900	Predicted oxidoreductase; Myosin-crossreactive antigen ortholog	LRHMDP3_2613	Predicted oxidoreductase; Myosin-crossreactive antigen ortholog	LC705_00495	myosin-cross-reactive antigen	PEL5_375	Predicted oxidoreductase; Myosin-crossreactive antigen ortholog	PEL6_2376	Predicted oxidoreductase; Myosin-crossreactive antigen ortholog	R0011_08843	myosin-cross-reactive antigen
LGG_00504	hypothetical protein	HMPREF0541_00048	hypothetical protein	LRHK_512	hypothetical protein	LRHM_0487	hypothetical protein	E800_242	hypothetical protein	LRH_11002	hypothetical protein	HMPREF0539_2805	conserved hypothetical protein	LRHMDP2_901	hypothetical protein	LRHMDP3_2612	hypothetical protein	LC705_00496	hypothetical protein	PEL5_376	hypothetical protein	PEL6_2377	hypothetical protein	R0011_08848	hypothetical protein
LGG_00505	transcriptional regulator	HMPREF0541_00049	putative dihydroxyacetone kinase regulator	LRHK_513	bacterial regulatory s, tetR family protein	LRHM_0488	transcriptional regulator	E800_241	Transcriptional regulator	LRH_11007	Transcriptional regulator	HMPREF0539_2806	transcriptional regulator	LRHMDP2_902	Transcriptional regulator	LRHMDP3_2611	Transcriptional regulator	LC705_00497	transcriptional regulator	PEL5_377	Transcriptional regulator	PEL6_2378	Transcriptional regulator	R0011_08853	transcriptional regulator
LGG_00506	dihydroxyacetone kinase, phosphotransfer subunit	HMPREF0541_00050	dihydroxyacetone kinase, phosphotransfer subunit	LRHK_514	PTS-dependent dihydroxyacetone kinase, phosphotransferase subunit dhaM	LRHM_0489	hypothetical protein	E800_240	Phosphoenolpyruvate-dihydroxyacetone phosphotransferase, subunit DhaM; DHA-specific IIA component	LRH_11012	hypothetical protein	HMPREF0539_2807	dihydroxyacetone kinase, phosphotransfer subunit	LRHMDP2_903	Phosphoenolpyruvate-dihydroxyacetone phosphotransferase, subunit DhaM; DHA-specific IIA component	LRHMDP3_2610	Phosphoenolpyruvate-dihydroxyacetone phosphotransferase, subunit DhaM; DHA-specific IIA component	LC705_00498	dihydroxyacetone kinase phosphotransfer subunit	PEL5_378	Phosphoenolpyruvate-dihydroxyacetone phosphotransferase, subunit DhaM; DHA-specific IIA component	PEL6_2379	Phosphoenolpyruvate-dihydroxyacetone phosphotransferase, subunit DhaM; DHA-specific IIA component	R0011_08858	dihydroxyacetone kinase phosphotransfer subunit
LGG_00507	hypothetical protein
LGG_00508	dihydroxyacetone kinase	HMPREF0541_00051	dihydroxyacetone kinase, L subunit	LRHK_515	dihydroxyacetone kinase subunit DhaL	LRHM_0490	dihydroxyacetone kinase	E800_239	Phosphoenolpyruvate-dihydroxyacetone phosphotransferase, ADP-binding subunit DhaL	LRH_11017	Dihydroxyacetone kinase	HMPREF0539_2808	glycerone kinase subunit L	LRHMDP2_904	Phosphoenolpyruvate-dihydroxyacetone phosphotransferase, ADP-binding subunit DhaL	LRHMDP3_2609	Phosphoenolpyruvate-dihydroxyacetone phosphotransferase, ADP-binding subunit DhaL	LC705_00499	dihydroxyacetone kinase	PEL5_379	Phosphoenolpyruvate-dihydroxyacetone phosphotransferase, ADP-binding subunit DhaL	PEL6_2380	Phosphoenolpyruvate-dihydroxyacetone phosphotransferase, ADP-binding subunit DhaL	R0011_08863	dihydroxyacetone kinase
LGG_00509	dihydroxyacetone kinase subunit DhaK	HMPREF0541_00052	dihydroxyacetone kinase, DhaK subunit	LRHK_516	dihydroxyacetone kinase subunit DhaK	LRHM_0491	dihydroxyacetone kinase	E800_238	Phosphoenolpyruvate-dihydroxyacetone phosphotransferase, dihydroxyacetone binding subunit DhaK	LRH_11022	Dihydroxyacetone kinase	HMPREF0539_2809	glycerone kinase subunit K	LRHMDP2_905	Phosphoenolpyruvate-dihydroxyacetone phosphotransferase, dihydroxyacetone binding subunit DhaK	LRHMDP3_2608	Phosphoenolpyruvate-dihydroxyacetone phosphotransferase, dihydroxyacetone binding subunit DhaK	LC705_00500	dihydroxyacetone kinase subunit DhaK	PEL5_380	Phosphoenolpyruvate-dihydroxyacetone phosphotransferase, dihydroxyacetone binding subunit DhaK	PEL6_2381	Phosphoenolpyruvate-dihydroxyacetone phosphotransferase, dihydroxyacetone binding subunit DhaK	R0011_08868	dihydroxyacetone kinase subunit DhaK
LGG_00510	disulfide bond formation regulator	HMPREF0541_00053	OsmC-like protein	LRHK_517	putative redox protein, regulator of disulfide bond formation	LRHM_0492	putative redox protein	E800_237	OsmC/Ohr family protein	LRH_11027	Predicted redox protein, regulator of disulfide bond formation	HMPREF0539_2810	probable organic hydroperoxide resistance protein	LRHMDP2_906	OsmC/Ohr family protein	LRHMDP3_2607	OsmC/Ohr family protein	LC705_00501	redox protein, regulator of disulfide bond formation	PEL5_381	OsmC/Ohr family protein	PEL6_2382	OsmC/Ohr family protein	R0011_08873	disulfide bond formation regulator
LGG_00511	ABC transporter ATP-binding protein			LRHK_102	ABC transporter family protein	LRHM_0493	putative multidrug ABC transporter ATP-binding component	E800_236	ABC transporter ATP-binding protein	LRH_11032	ABC transporter ATP-binding protein	HMPREF0539_0258	ABC superfamily ATP binding cassette transporter, ABC protein	LRHMDP2_907	ABC transporter ATP-binding protein	LRHMDP3_2606	ABC transporter ATP-binding protein	LC705_00096	ABC transporter ATPase	PEL5_382	ABC transporter ATP-binding protein	PEL6_2383	ABC transporter ATP-binding protein
LGG_00512	ABC transporter					LRHM_0494	hypothetical protein	E800_235	Putative uncharacterized protein	LRH_11037	hypothetical protein			LRHMDP2_908	hypothetical protein	LRHMDP3_2605	hypothetical protein			PEL5_383	hypothetical protein	PEL6_2384	hypothetical protein
LGG_00514	hypothetical protein					LRHM_0496	hypothetical protein							LRHMDP2_909	hypothetical protein	LRHMDP3_2604	hypothetical protein
LGG_00515	hypothetical protein					LRHM_0497	hypothetical protein													PEL5_2311	hypothetical protein	PEL6_790	hypothetical protein
LGG_00516	transcriptional activator					LRHM_0498	hypothetical protein							LRHMDP2_910	DNA-directed RNA polymerase beta subunit	LRHMDP3_2603	DNA-directed RNA polymerase beta subunit			PEL5_2312	DNA-directed RNA polymerase beta subunit	PEL6_791	DNA-directed RNA polymerase beta subunit
LGG_00517	transposase IS5 family protein					LRHM_0499	putative transposase
LGG_00518	DNA polymerase III alpha subunit (Gram-positive type)	HMPREF0541_00055	exonuclease	LRHK_523	exonuclease family protein	LRHM_0501	hypothetical protein	E800_2669	FIG00749541: hypothetical protein	LRH_02757	DNA polymerase III, alpha subunit (gram-positive type)	HMPREF0539_2815	DNA polymerase III, alpha subunit (gram-positive type)	LRHMDP2_912	FIG00749541: hypothetical protein	LRHMDP3_2601	FIG00749541: hypothetical protein	LC705_00507	DNA polymerase III subunit alpha	PEL5_105	FIG00749541: hypothetical protein	PEL6_54	FIG00749541: hypothetical protein	R0011_08883	DNA polymerase III alpha subunit (Gram-positive type)
LGG_00519	hypothetical protein	HMPREF0541_00057	addiction module antitoxin, RelB/DinJ family	LRHK_525	RelB/DinJ family addiction module antitoxin	LRHM_0502	hypothetical protein	E800_2670	hypothetical protein	LRH_02752	hypothetical protein	HMPREF0539_2817	conserved hypothetical protein	LRHMDP2_914	hypothetical protein	LRHMDP3_2599	hypothetical protein	LC705_00509	hypothetical protein	PEL5_104	hypothetical protein	PEL6_55	hypothetical protein	R0011_08893	hypothetical protein
LGG_00520	ArsR family transcriptional regulator	HMPREF0541_00058	transcriptional regulator, ArsR family	LRHK_527	bacterial regulatory, arsR family protein	LRHM_0503	transcriptional regulator	E800_2671	Predicted transcriptional regulator	LRH_02747	Predicted transcriptional regulator	HMPREF0539_2819	ArsR family transcriptional regulator	LRHMDP2_915	Predicted transcriptional regulator	LRHMDP3_2598	Predicted transcriptional regulator	LC705_00511	ArsR family transcriptional regulator	PEL5_103	Predicted transcriptional regulator	PEL6_56	Predicted transcriptional regulator	R0011_08898	ArsR family transcriptional regulator
LGG_00521	transporter major facilitator superfamily MFS_1	HMPREF0541_00059	transporter, major facilitator family protein	LRHK_528	major facilitator superfamily protein	LRHM_0504	transporter protein	E800_2672	multidrug resistance protein, putative	LRH_02742	permease of the major facilitator superfamily protein	HMPREF0539_2820	permease of the major facilitator superfamily protein	LRHMDP2_916	multidrug resistance protein, putative	LRHMDP3_2597	multidrug resistance protein, putative	LC705_00512	MFS superfamily transporter	PEL5_102	multidrug resistance protein, putative	PEL6_57	multidrug resistance protein, putative	R0011_08903	transporter major facilitator superfamily MFS_1
LGG_00522	DNA-3-methyladenine glycosylase I	HMPREF0541_00063	putative DNA-3-methyladenine glycosylase 1	LRHK_529	methyladenine glycosylase family protein	LRHM_0505	3-methyladenine DNA glycosylase	E800_2673	DNA-3-methyladenine glycosylase	LRH_02737	3-methyladenine DNA glycosylase	HMPREF0539_2821	DNA-3-methyladenine glycosylase I	LRHMDP2_917	DNA-3-methyladenine glycosylase	LRHMDP3_2596	DNA-3-methyladenine glycosylase	LC705_00513	DNA-3-methyladenine glycosylase I	PEL5_101	DNA-3-methyladenine glycosylase	PEL6_58	DNA-3-methyladenine glycosylase	R0011_08923	DNA-3-methyladenine glycosylase I
LGG_00523	hypothetical protein	HMPREF0541_00064	hypothetical protein	LRHK_532	hypothetical protein	LRHM_0506	hypothetical protein	E800_2674	Programmed cell death antitoxin MazE	LRH_02732	hypothetical protein	HMPREF0539_2824	conserved hypothetical protein	LRHMDP2_918	Programmed cell death antitoxin MazE	LRHMDP3_2595	Programmed cell death antitoxin MazE	LC705_00516	hypothetical protein	PEL5_100	Programmed cell death antitoxin MazE	PEL6_59	Programmed cell death antitoxin MazE	R0011_08928	hypothetical protein
LGG_00524	fructose-bisphosphate aldolase	HMPREF0541_00065	fructose-1,6-bisphosphate aldolase, class II	LRHK_533	ketose-bisphosphate aldolases family protein	LRHM_0507	fructose-bisphosphate aldolase	E800_2675	Fructose-bisphosphate aldolase class II	LRH_02727	Fructose/tagatose bisphosphate aldolase	HMPREF0539_2825	fructose-bisphosphate aldolase	LRHMDP2_919	Fructose-bisphosphate aldolase class II	LRHMDP3_2594	Fructose-bisphosphate aldolase class II	LC705_00517	fructose-bisphosphate aldolase	PEL5_99	Fructose-bisphosphate aldolase class II	PEL6_60	Fructose-bisphosphate aldolase class II	R0011_08933	fructose-bisphosphate aldolase
LGG_00525	pyruvate oxidase	HMPREF0541_00067	putative pyruvate oxidase	LRHK_534	thiamine pyrophosphate enzyme, C-terminal TPP binding domain protein	LRHM_0508	pyruvate oxidase	E800_2676	Pyruvate oxidase [ubiquinone, cytochrome]	LRH_02722	pyruvate oxidase	HMPREF0539_2826	possible pyruvate oxidase	LRHMDP2_920	Pyruvate oxidase [ubiquinone, cytochrome]	LRHMDP3_2593	Pyruvate oxidase [ubiquinone, cytochrome]	LC705_00518	pyruvate oxidase	PEL5_98	Pyruvate oxidase [ubiquinone, cytochrome]	PEL6_61	Pyruvate oxidase [ubiquinone, cytochrome]	R0011_08938	pyruvate oxidase
LGG_00526	hypothetical protein	HMPREF0541_00068	hypothetical protein	LRHK_535	hypothetical protein	LRHM_0509	hypothetical protein	E800_2677	FIG00754012: hypothetical protein	LRH_02717	hypothetical protein	HMPREF0539_2827	conserved hypothetical protein	LRHMDP2_921	FIG00754012: hypothetical protein	LRHMDP3_2592	FIG00754012: hypothetical protein	LC705_00519	hypothetical protein	PEL5_97	FIG00754012: hypothetical protein	PEL6_62	FIG00754012: hypothetical protein	R0011_08943	hypothetical protein
LGG_00527	hypothetical protein					LRHM_0510	hypothetical protein
LGG_00528	beta-lactamase class C-like penicillin binding protein	HMPREF0541_00070	beta-lactamase	LRHK_536	beta-lactamase family protein	LRHM_0511	putative beta-lactamase	E800_2678	Beta-lactamase class C and other penicillin binding proteins	LRH_02712	Beta-lactamase class C related penicillin binding protein	HMPREF0539_2828	beta-lactamase family protein	LRHMDP2_922	Beta-lactamase class C and other penicillin binding proteins	LRHMDP3_2591	Beta-lactamase class C and other penicillin binding proteins	LC705_00520	beta-lactamase class C-like penicillin binding protein	PEL5_96	Beta-lactamase class C and other penicillin binding proteins	PEL6_63	Beta-lactamase class C and other penicillin binding proteins	R0011_08948	beta-lactamase class C-like penicillin binding protein
LGG_00529	hypothetical protein							E800_2679	hypothetical protein
LGG_00530	L-alanine-DL-glutamate epimerase-like protein	HMPREF0541_00071	mandelate racemase/muconate lactonizing enzyme protein	LRHK_537	mandelate racemase / muconate lactonizing enzyme, C-terminal domain protein	LRHM_0512	mandelate racemase/muconate lactonizing protein	E800_2680	Muconate cycloisomerase	LRH_02707	L-alanine-DL-glutamate epimerase related enzyme of enolase superfamily protein	HMPREF0539_2829	possible muconate cycloisomerase	LRHMDP2_923	Muconate cycloisomerase	LRHMDP3_2590	Muconate cycloisomerase	LC705_00521	L-alanine-DL-glutamate epimerase-like protein	PEL5_95	Muconate cycloisomerase	PEL6_64	Muconate cycloisomerase	R0011_08953	L-alanine-DL-glutamate epimerase-like protein
LGG_00531	hypothetical protein			LRHK_538	hypothetical protein	LRHM_0513	hypothetical protein	E800_2681	hypothetical protein									LC705_00522	hypothetical protein	PEL5_94	hypothetical protein	PEL6_65	hypothetical protein
LGG_00532	methyltransferase	HMPREF0541_00072	methyltransferase domain protein	LRHK_539	hypothetical protein	LRHM_0514	putative methyltransferase	E800_2682	Ubiquinone/menaquinone biosynthesis methyltransferase UBIE	LRH_02702	SAM-dependent methyltransferase	HMPREF0539_2830	SAM-dependent methyltransferase	LRHMDP2_924	Ubiquinone/menaquinone biosynthesis methyltransferase UBIE	LRHMDP3_2589	Ubiquinone/menaquinone biosynthesis methyltransferase UBIE	LC705_00523	methyltransferase	PEL5_93	Ubiquinone/menaquinone biosynthesis methyltransferase UBIE	PEL6_66	Ubiquinone/menaquinone biosynthesis methyltransferase UBIE	R0011_08958	methyltransferase
LGG_00533	hypothetical protein					LRHM_0515	hypothetical protein	E800_2683	hypothetical protein	LRH_02697	hypothetical protein									PEL5_92	hypothetical protein	PEL6_67	hypothetical protein
LGG_00534	glutamine amidotransferase	HMPREF0541_00073	peptidase C26	LRHK_540	peptidase C26 family protein	LRHM_0516	glutamine amidotransferase	E800_2684	Glutamine amidotransferase, class I	LRH_02692	Predicted glutamine amidotransferase	HMPREF0539_2831	possible gamma-glutamyl-gamma-aminobutyrate hydrolase	LRHMDP2_925	Glutamine amidotransferase, class I	LRHMDP3_2588	Glutamine amidotransferase, class I	LC705_00524	glutamine amidotransferase	PEL5_91	Glutamine amidotransferase, class I	PEL6_68	Glutamine amidotransferase, class I	R0011_08963	glutamine amidotransferase
LGG_00535	hypothetical protein					LRHM_0517	hypothetical protein	E800_2685	hypothetical protein	LRH_02687	hypothetical protein									PEL5_90	hypothetical protein	PEL6_69	hypothetical protein
LGG_00536	glutamine synthetase	HMPREF0541_00076	glutamate--ammonia ligase, catalytic domain protein	LRHK_543	glutamine synthetase, catalytic domain protein	LRHM_0518	glutamine synthetase	E800_2686	FIG00743416: hypothetical protein	LRH_02682	Glutamine synthetase	HMPREF0539_2834	possible glutamate--ammonia ligase	LRHMDP2_928	FIG00743416: hypothetical protein	LRHMDP3_2585	FIG00743416: hypothetical protein	LC705_00527	glutamine synthetase	PEL5_89	FIG00743416: hypothetical protein	PEL6_70	FIG00743416: hypothetical protein	R0011_08978	glutamine synthetase
LGG_00537	hypothetical protein													LRHMDP2_396	Alpha-galactosidase	LRHMDP3_1546	Alpha-galactosidase
LGG_00538	metal-dependent hydrolase of the TIM-barrel fold protein	HMPREF0541_00077	amidohydrolase family protein	LRHK_544	putative metal-dependent hydrolase of the TIM-barrel fold family	LRHM_0519	putative metal-dependent hydrolase	E800_2687	nodulin / glutamate-ammonia ligase-like protein	LRH_02677	Predicted metal-dependent hydrolase of the TIM-barrel fold protein	HMPREF0539_2835	amidohydrolase 2	LRHMDP2_929	nodulin / glutamate-ammonia ligase-like protein	LRHMDP3_2584	nodulin / glutamate-ammonia ligase-like protein	LC705_00528	metal-dependent hydrolase of the TIM-barrel fold protein	PEL5_88	nodulin / glutamate-ammonia ligase-like protein	PEL6_71	nodulin / glutamate-ammonia ligase-like protein	R0011_08983	metal-dependent hydrolase of the TIM-barrel fold protein
LGG_00539	amino acid transporter	HMPREF0541_00078	amino acid permease	LRHK_545	amino acid permease family protein	LRHM_0520	amino acid transporter protein	E800_2688	FIG00745800: hypothetical protein	LRH_02672	Amino acid transporter	HMPREF0539_2836	amino acid transporter	LRHMDP2_930	FIG00745800: hypothetical protein	LRHMDP3_2583	FIG00745800: hypothetical protein	LC705_00529	amino acid transporter	PEL5_87	FIG00745800: hypothetical protein	PEL6_72	FIG00745800: hypothetical protein	R0011_08988	amino acid transporter
LGG_00540	MerR family transcriptional regulator	HMPREF0541_00080	transcriptional regulator, MerR family	LRHK_546	MerR family transcriptional regulator	LRHM_0521	transcriptional regulator	E800_2690	Transcriptional regulator, MerR family	LRH_02667	Predicted transcriptional regulator	HMPREF0539_2837	MerR family transcriptional regulator	LRHMDP2_932	Transcriptional regulator, MerR family	LRHMDP3_2582	Transcriptional regulator, MerR family	LC705_00530	MerR family transcriptional regulator	PEL5_85	Transcriptional regulator, MerR family	PEL6_74	Transcriptional regulator, MerR family	R0011_08993	MerR family transcriptional regulator
LGG_00541	aldo/keto reductase family oxidoreductase	HMPREF0541_00081	putative glyoxal reductase	LRHK_547	aldo/keto reductase family protein	LRHM_0522	aldo/keto reductase	E800_2691	oxidoreductase of aldo/keto reductase family, subgroup 1	LRH_02662	Aldo/keto reductase of diketogulonate reductase family protein	HMPREF0539_2838	possible 2,5-didehydrogluconate reductase	LRHMDP2_933	oxidoreductase of aldo/keto reductase family, subgroup 1	LRHMDP3_2581	oxidoreductase of aldo/keto reductase family, subgroup 1	LC705_00531	aldo/keto reductase family oxidoreductase	PEL5_84	oxidoreductase of aldo/keto reductase family, subgroup 1	PEL6_75	oxidoreductase of aldo/keto reductase family, subgroup 1	R0011_08998	aldo/keto reductase family oxidoreductase
LGG_00542	alcohol dehydrogenase	HMPREF0541_00082	zinc-binding alcohol dehydrogenase family protein	LRHK_548	zinc-binding alcohol dehydrogenase family protein	LRHM_0523	NADPH:quinone reductase	E800_2692	Alcohol dehydrogenase	LRH_02657	NADPH:quinone reductase related Zn-dependent oxidoreductase	HMPREF0539_2839	NADPH:quinone reductase	LRHMDP2_934	Alcohol dehydrogenase	LRHMDP3_2580	Alcohol dehydrogenase	LC705_00532	alcohol dehydrogenase	PEL5_83	Alcohol dehydrogenase	PEL6_76	Alcohol dehydrogenase	R0011_09003	alcohol dehydrogenase
LGG_00543	HxlR family transcriptional regulator	HMPREF0541_00083	transcriptional regulator, HxlR family	LRHK_549	hxlR-like helix-turn-helix family protein	LRHM_0524	transcriptional regulator	E800_2693	Transcriptional regulator, MarR family; Cinnamoyl ester hydrolase	LRH_02652	Predicted transcriptional regulator	HMPREF0539_2840	possible transcriptional regulator	LRHMDP2_935	Transcriptional regulator, MarR family; Cinnamoyl ester hydrolase	LRHMDP3_2579	Transcriptional regulator, MarR family; Cinnamoyl ester hydrolase	LC705_00533	transcriptional regulator HxlR family	PEL5_82	Transcriptional regulator, MarR family; Cinnamoyl ester hydrolase	PEL6_77	Transcriptional regulator, MarR family; Cinnamoyl ester hydrolase	R0011_09008	transcriptional regulator HxlR family protein
LGG_00544	integral membrane protein	HMPREF0541_00084	hypothetical protein	LRHK_550	sulfite exporter TauE/SafE family protein	LRHM_0525	putative transporter protein	E800_2694	Predicted permease	LRH_02647	Hypothetical integral membrane protein	HMPREF0539_2841	hypothetical integral membrane protein	LRHMDP2_936	Predicted permease	LRHMDP3_2578	Predicted permease	LC705_00534	integral membrane protein	PEL5_81	Predicted permease	PEL6_78	Predicted permease	R0011_09013	integral membrane protein
LGG_00545	ABC transporter permease	HMPREF0541_00085	hypothetical protein	LRHK_552	hypothetical protein	LRHM_0526	hypothetical protein	E800_2696	FIG00744342: hypothetical protein	LRH_02642	hypothetical protein	HMPREF0539_2842	conserved hypothetical protein	LRHMDP2_944	FIG00744342: hypothetical protein	LRHMDP3_2571	FIG00744342: hypothetical protein	LC705_00535	ABC transporter permease	PEL5_79	FIG00744342: hypothetical protein	PEL6_79	FIG00744342: hypothetical protein	R0011_09018	ABC transporter permease
LGG_00546	ABC transporter ATP-binding protein	HMPREF0541_00086	ABC transporter, ATP-binding protein	LRHK_553	ABC transporter family protein	LRHM_0527	putative multidrug ABC transporter ATP-binding component	E800_2697	ABC-type uncharacterized transport system, ATPase component	LRH_02637	ABC-type uncharacterized transport system, ATPase component	HMPREF0539_2843	ABC superfamily ATP binding cassette transporter, ABC protein	LRHMDP2_945	ABC-type uncharacterized transport system, ATPase component	LRHMDP3_2570	ABC-type uncharacterized transport system, ATPase component	LC705_00536	ABC transporter ATP-binding protein	PEL5_78	ABC-type uncharacterized transport system, ATPase component	PEL6_80	ABC-type uncharacterized transport system, ATPase component	R0011_09023	ABC transporter ATP-binding protein
LGG_00547	ABC transporter ATP-binding protein	HMPREF0541_00087	hypothetical protein	LRHK_554	hypothetical protein	LRHM_0528	hypothetical protein	E800_2698	FIG00743901: hypothetical protein	LRH_02632	hypothetical protein	HMPREF0539_2844	conserved hypothetical protein	LRHMDP2_946	FIG00743901: hypothetical protein	LRHMDP3_2569	FIG00743901: hypothetical protein	LC705_00537	ABC transporter ATPase	PEL5_77	FIG00743901: hypothetical protein	PEL6_81	FIG00743901: hypothetical protein	R0011_09028	ABC transporter ATPase
LGG_00548	two-component response regulator	HMPREF0541_00088	putative subtilin biosynthesis regulatory protein SpaR	LRHK_555	transcriptional regulatory, C terminal family protein	LRHM_0529	two-component response regulator	E800_2699	DNA-binding response regulator, OmpR family (Rec-wHTH domains)	LRH_02627	DNA-binding response regulator, OmpR family (Rec-wHTH domains)	HMPREF0539_2845	response regulator	LRHMDP2_947	DNA-binding response regulator, OmpR family (Rec-wHTH domains)	LRHMDP3_2568	DNA-binding response regulator, OmpR family (Rec-wHTH domains)	LC705_00538	two-component response regulator	PEL5_76	DNA-binding response regulator, OmpR family (Rec-wHTH domains)	PEL6_82	DNA-binding response regulator, OmpR family (Rec-wHTH domains)	R0011_09033	two-component response regulator
LGG_00549	two component sensor transduction histidine kinase	HMPREF0541_00089	ATPase/histidine kinase/DNA gyrase B/HSP90 domain protein	LRHK_556	HAMP domain protein	LRHM_0530	two-component sensor kinase	E800_2700	Signal transduction histidine kinase	LRH_02622	Signal transduction histidine kinase	HMPREF0539_2846	signal transduction histidine kinase	LRHMDP2_948	Signal transduction histidine kinase	LRHMDP3_2567	Signal transduction histidine kinase	LC705_00539	two component sensor transduction histidine kinase	PEL5_75	Signal transduction histidine kinase	PEL6_83	Signal transduction histidine kinase	R0011_09038	two component sensor transduction histidine kinase
LGG_00550	ABC transporter ATP-binding protein	HMPREF0541_00090	ABC transporter, ATP-binding protein	LRHK_557	ABC transporter family protein	LRHM_0531	putative multidrug ABC transporter ATP-binding component	E800_2701	ABC transporter ATP-binding protein	LRH_02617	ABC-type metal ion transport system, ATPase component	HMPREF0539_2847	ABC superfamily ATP binding cassette transporter, ABC protein	LRHMDP2_949	ABC transporter ATP-binding protein	LRHMDP3_2566	ABC transporter ATP-binding protein	LC705_00540	ABC transporter ATPase	PEL5_73	ABC transporter ATP-binding protein	PEL6_85	ABC transporter ATP-binding protein	R0011_09043	ABC transporter ATPase
LGG_00551	hypothetical protein	HMPREF0541_00091	hypothetical protein	LRHK_558	ABC-2 transporter family protein	LRHM_0532	hypothetical protein	E800_2702	FIG00743354: hypothetical protein	LRH_02612	hypothetical protein	HMPREF0539_2848	probable ABC superfamily ATP binding cassette transporter, permease permease	LRHMDP2_950	FIG00743354: hypothetical protein	LRHMDP3_2565	FIG00743354: hypothetical protein	LC705_00541	hypothetical protein	PEL5_72	FIG00743354: hypothetical protein	PEL6_86	FIG00743354: hypothetical protein	R0011_09048	hypothetical protein
LGG_00552	hypothetical protein	HMPREF0541_00092	hypothetical protein	LRHK_559	hypothetical protein	LRHM_0533	hypothetical protein	E800_2703	FIG00742685: hypothetical protein	LRH_02607	hypothetical protein	HMPREF0539_2849	conserved hypothetical protein	LRHMDP2_951	FIG00742685: hypothetical protein	LRHMDP3_2564	FIG00742685: hypothetical protein	LC705_00542	hypothetical protein	PEL5_71	FIG00742685: hypothetical protein	PEL6_87	FIG00742685: hypothetical protein	R0011_09053	hypothetical protein
LGG_00553	hypothetical protein	HMPREF0541_00093	hypothetical protein			LRHM_0534	hypothetical protein	E800_2704	ATP-dependent nuclease, subunit B											PEL5_70	Malolactic regulator	PEL6_88	Response regulator receiver:Transcriptional regulatory protein, C-terminal
LGG_00554	aminopeptidase N	HMPREF0541_00094	membrane alanyl aminopeptidase	LRHK_560	aminopeptidase N	LRHM_0535	aminopeptidase N	E800_2705	Lysyl aminopeptidase	LRH_02602	aminopeptidase N	HMPREF0539_2850	membrane alanyl aminopeptidase	LRHMDP2_952	Lysyl aminopeptidase	LRHMDP3_2563	Lysyl aminopeptidase	LC705_00543	aminopeptidase N	PEL5_69	Lysyl aminopeptidase	PEL6_89	Lysyl aminopeptidase	R0011_09058	aminopeptidase N
LGG_00555	amino acid permease family protein	HMPREF0541_00095	amino acid permease	LRHK_561	inner membrane transporter ycaM	LRHM_0536	amino acid transporter protein	E800_2706	Probable transport protein	LRH_02597	Amino acid transporter	HMPREF0539_2851	APC family amino acid-polyamine-organocation transporter	LRHMDP2_953	Probable transport protein	LRHMDP3_2562	Probable transport protein	LC705_00544	amino acid permease family protein	PEL5_68	Probable transport protein	PEL6_90	Probable transport protein	R0011_09063	amino acid permease family protein
LGG_00556	hypothetical protein					LRHM_0537	hypothetical protein											LC705_00545	hypothetical protein	PEL5_67	Malolactic regulator	PEL6_91	Malolactic regulator
LGG_00557	transporter major facilitator superfamily MFS_1, Na/xyloside symporter	HMPREF0541_00097	glycoside/pentoside/hexuronide transporter	LRHK_562	sugar (Glycoside-Pentoside-Hexuronide) transporter domain protein	LRHM_0538	putative melibiose symporter	E800_2707	Xyloside transporter XynT	LRH_02592	Na+/xyloside symporter or related transporter	HMPREF0539_2852	GPH family glycoside-pentoside-hexuronide:cation symporter	LRHMDP2_955	Xyloside transporter XynT	LRHMDP3_2560	Xyloside transporter XynT	LC705_00546	MFS superfamily Na/xyloside symporter	PEL5_66	Xyloside transporter XynT	PEL6_92	Xyloside transporter XynT
LGG_00558	periplasmic/secreted protein	HMPREF0541_00098	hypothetical protein	LRHK_564	hypothetical protein	LRHM_0539	hypothetical protein	E800_2709	protein of unknown function DUF1440	LRH_02587	Predicted periplasmic/secreted protein	HMPREF0539_2853	possible periplasmic/secreted protein	LRHMDP2_957	protein of unknown function DUF1440	LRHMDP3_2558	protein of unknown function DUF1440	LC705_00547	periplasmic/secreted protein	PEL5_65	hypothetical protein	PEL6_93	hypothetical protein	R0011_09078	periplasmic/secreted protein
LGG_00559	LysR family transcriptional regulator					LRHM_0540	transcriptional regulator													PEL5_64	transcriptional regulator, LysR family	PEL6_94	transcriptional regulator, LysR family
LGG_00560	hypothetical protein													LRHMDP2_1869	Alpha-galactosidase	LRHMDP3_1259	Alpha-galactosidase			PEL5_63	Alpha-galactosidase	PEL6_95	Alpha-galactosidase
LGG_00561	sugar phosphate isomerase/epimerase					LRHM_0541	putative isomerase													PEL5_62	Inosose isomerase	PEL6_96	Inosose isomerase
LGG_00562	short-chain dehydrogenase/reductase SDR					LRHM_0542	short-chain dehydrogenase													PEL5_61	2-deoxy-D-gluconate 3-dehydrogenase	PEL6_97	2-deoxy-D-gluconate 3-dehydrogenase
LGG_00563	hypothetical protein																			PEL5_60	hypothetical protein	PEL6_98	hypothetical protein
LGG_00564	shikimate 5-dehydrogenase					LRHM_0543	shikimate 5-dehydrogenase													PEL5_59	Shikimate/quinate 5-dehydrogenase I beta	PEL6_99	Shikimate/quinate 5-dehydrogenase I beta
LGG_00565	transporter major facilitator superfamily MFS_1					LRHM_0544	transporter													PEL5_58	transport protein	PEL6_101	transport protein
LGG_00566	shikimate 5-dehydrogenase					LRHM_0545	shikimate 5-dehydrogenase													PEL5_57	Shikimate/quinate 5-dehydrogenase I beta	PEL6_102	Shikimate/quinate 5-dehydrogenase I beta
LGG_00567	homoserine O-succinyltransferase	HMPREF0541_00099	homoserine O-succinyltransferase	LRHK_565	homoserine O-succinyltransferase family protein	LRHM_0546	homoserine trans-succinylase	E800_2710	Homoserine O-succinyltransferase	LRH_02582	Homoserine trans-succinylase	HMPREF0539_2854	possible homoserine O-succinyltransferase	LRHMDP2_958	Homoserine O-succinyltransferase	LRHMDP3_2557	Homoserine O-succinyltransferase	LC705_00548	homoserine O-succinyltransferase	PEL5_56	Homoserine O-succinyltransferase	PEL6_103	Homoserine O-succinyltransferase	R0011_09083	homoserine O-succinyltransferase
LGG_00568	cysteine synthase	HMPREF0541_00100	cysteine synthase A	LRHK_566	cysteine synthase A	LRHM_0547	cysteine synthase	E800_2711	Cysteine synthase	LRH_02577	Cysteine synthase	HMPREF0539_2855	cysteine synthase	LRHMDP2_959	Cysteine synthase	LRHMDP3_2556	Cysteine synthase	LC705_00549	cysteine synthase	PEL5_55	Cysteine synthase	PEL6_104	Cysteine synthase	R0011_09088	cysteine synthase
LGG_00569	hypothetical protein	HMPREF0541_00102	hypothetical protein	LRHK_568	hypothetical protein	LRHM_0548	hypothetical protein	E800_2712	FIG00749334: hypothetical protein	LRH_02572	hypothetical protein	HMPREF0539_2856	conserved hypothetical protein	LRHMDP2_960	FIG00749334: hypothetical protein	LRHMDP3_2555	FIG00749334: hypothetical protein	LC705_00550	hypothetical protein	PEL5_54	FIG00749334: hypothetical protein	PEL6_105	FIG00749334: hypothetical protein	R0011_09093	hypothetical protein
LGG_00570	hypothetical protein	HMPREF0541_00103	hypothetical protein	LRHK_569	hypothetical protein	LRHM_0549	hypothetical protein	E800_2713	hypothetical protein	LRH_02567	hypothetical protein	HMPREF0539_2857	conserved hypothetical protein	LRHMDP2_961	hypothetical protein	LRHMDP3_2554	hypothetical protein	LC705_00551	hypothetical protein	PEL5_53	hypothetical protein	PEL6_106	hypothetical protein	R0011_09098	hypothetical protein
LGG_00571	cystathionine gamma-synthase	HMPREF0541_00104	putative cystathionine beta-lyase	LRHK_570	cystathionine beta-lyase	LRHM_0550	cystathionine gamma-synthase	E800_2714	Cystathionine gamma-lyase	LRH_02562	Cystathionine beta-lyase/cystathionine gamma-synthase	HMPREF0539_2858	cystathionine gamma-synthase	LRHMDP2_962	Cystathionine gamma-lyase	LRHMDP3_2553	Cystathionine gamma-lyase	LC705_00552	cystathionine gamma-synthase	PEL5_52	Cystathionine gamma-lyase	PEL6_107	Cystathionine gamma-lyase	R0011_09103	cystathionine gamma-synthase
LGG_00572	amino acid ABC transporter substrate-binding protein	HMPREF0541_00105	ABC transporter, substrate-binding protein, family 3			LRHM_0551	ABC transporter substrate binding component	E800_2715	ABC-type amino acid transport/signal transduction system, periplasmic component/domain	LRH_02557	ABC-type amino acid transport/signal transduction system, periplasmic component/domain	HMPREF0539_2859	amino acid ABC superfamily ATP binding cassette transporter, binding protein	LRHMDP2_963	ABC-type amino acid transport/signal transduction system, periplasmic component/domain	LRHMDP3_2552	ABC-type amino acid transport/signal transduction system, periplasmic component/domain	LC705_00553	amino acid ABC transporter substrate-binding protein	PEL5_51	ABC-type amino acid transport/signal transduction system, periplasmic component/domain	PEL6_108	ABC-type amino acid transport/signal transduction system, periplasmic component/domain	R0011_09108	amino acid ABC transporter substrate-binding protein
LGG_00573	amino acid ABC transporter permease	HMPREF0541_00106	ABC transporter, permease protein	LRHK_573	amino ABC transporter, permease, 3-TM region, His/Glu/Gln/Arg/opine family domain protein	LRHM_0552	ABC transporter permease	E800_2716	amino acid ABC transporter, permease protein	LRH_02552	ABC-type amino acid transport system, permease component	HMPREF0539_2861	L-cystine ABC superfamily ATP binding cassette transporter, membrane protein YckJ	LRHMDP2_964	amino acid ABC transporter, permease protein	LRHMDP3_2551	amino acid ABC transporter, permease protein	LC705_00554	amino acid ABC transporter permease	PEL5_50	amino acid ABC transporter, permease protein	PEL6_109	amino acid ABC transporter, permease protein	R0011_09113	amino acid ABC transporter permease
LGG_00574	hypothetical protein	HMPREF0541_00107	hypothetical protein	LRHK_575	hypothetical protein	LRHM_0553	hypothetical protein	E800_2717	Flagellar hook-length control protein FliK	LRH_02547	hypothetical protein	HMPREF0539_2863	conserved hypothetical protein	LRHMDP2_965	Flagellar hook-length control protein FliK	LRHMDP3_2550	Flagellar hook-length control protein FliK	LC705_00555	hypothetical protein	PEL5_49	Flagellar hook-length control protein FliK	PEL6_110	Flagellar hook-length control protein FliK	R0011_09118	hypothetical protein
LGG_00575	branched-chain amino acid transport protein	HMPREF0541_00108	branched-chain amino acid transport system II carrier protein	LRHK_576	branched-chain amino acid transport system II carrier protein	LRHM_0554	branched-chain amino acid transporter protein	E800_2718	Branched-chain amino acid transport system carrier protein	LRH_02542	Branched-chain amino acid permease	HMPREF0539_2864	LIVCS family branched chain amino acid:cation symporter	LRHMDP2_966	Branched-chain amino acid transport system carrier protein	LRHMDP3_2549	Branched-chain amino acid transport system carrier protein	LC705_00556	branched-chain amino acid transport protein	PEL5_48	Branched-chain amino acid transport system carrier protein	PEL6_111	Branched-chain amino acid transport system carrier protein	R0011_09123	branched-chain amino acid transport protein
LGG_00576	hypothetical protein	HMPREF0541_00109	hypothetical protein	LRHK_577	hypothetical protein	LRHM_0555	putative cell surface protein	E800_2719	FIG00745582: hypothetical protein	LRH_02537	hypothetical protein	HMPREF0539_2865	WxL domain surface protein	LRHMDP2_967	FIG00745582: hypothetical protein	LRHMDP3_2548	FIG00745582: hypothetical protein	LC705_00557	hypothetical protein	PEL5_47	FIG00745582: hypothetical protein	PEL6_112	FIG00745582: hypothetical protein	R0011_09128	hypothetical protein
LGG_00577	cell surface protein	HMPREF0541_00110	hypothetical protein	LRHK_578	hypothetical protein	LRHM_0556	putative cell surface protein	E800_2720	cell surface protein precursor	LRH_02532	cell surface protein	HMPREF0539_2866	cell surface protein	LRHMDP2_968	cell surface protein precursor	LRHMDP3_2547	cell surface protein precursor	LC705_00558	cell surface protein	PEL5_46	cell surface protein precursor	PEL6_113	cell surface protein precursor	R0011_09133	cell surface protein
LGG_00578	hypothetical protein	HMPREF0541_00111	LPXTG-motif protein cell wall anchor domain protein	LRHK_579	LPXTG-motif cell wall anchor domain-containing protein	LRHM_0557	putative cell surface protein	E800_2721	FIG00742986: hypothetical protein	LRH_02527	hypothetical protein	HMPREF0539_2867	conserved hypothetical protein	LRHMDP2_969	FIG00742986: hypothetical protein	LRHMDP3_2546	FIG00742986: hypothetical protein	LC705_00559	hypothetical protein	PEL5_45	FIG00742986: hypothetical protein	PEL6_114	FIG00742986: hypothetical protein	R0011_09138	hypothetical protein
LGG_00579	extracellular protein	HMPREF0541_00112	legume lectins beta domain protein	LRHK_580	hypothetical protein	LRHM_0558	putative cell surface protein	E800_2722	FIG00744190: hypothetical protein	LRH_02522	hypothetical protein	HMPREF0539_2868	conserved hypothetical protein	LRHMDP2_970	FIG00744190: hypothetical protein	LRHMDP3_2545	FIG00744190: hypothetical protein	LC705_00560	extracellular protein	PEL5_44	FIG00744190: hypothetical protein	PEL6_115	FIG00744190: hypothetical protein	R0011_09143	hypothetical protein
LGG_00580	hypothetical protein			LRHK_581	hypothetical protein							HMPREF0539_2869	hypothetical protein	LRHMDP2_971	hypothetical protein			LC705_00561	hypothetical protein
LGG_00583	hypothetical protein			LRHK_582	hypothetical protein	LRHM_0561	putative cell surface protein					HMPREF0539_2870	WxL domain surface protein	LRHMDP2_972	FIG00747492: hypothetical protein	LRHMDP3_2544	FIG00747492: hypothetical protein	LC705_00562	hypothetical protein	PEL5_2236	FIG00747492: hypothetical protein	PEL6_1995	FIG00747492: hypothetical protein
LGG_00584	hypothetical protein			LRHK_583	hypothetical protein	LRHM_0562	putative cell surface protein					HMPREF0539_2871	conserved hypothetical protein	LRHMDP2_973	FIG00743076: hypothetical protein	LRHMDP3_2543	FIG00743076: hypothetical protein	LC705_00563	hypothetical protein	PEL5_2237	FIG00743076: hypothetical protein	PEL6_1994	FIG00743076: hypothetical protein
LGG_00585	hypothetical protein			LRHK_584	hypothetical protein	LRHM_0563	putative cell surface protein					HMPREF0539_2872	conserved hypothetical protein	LRHMDP2_974	FIG00745255: hypothetical protein	LRHMDP3_2542	FIG00745255: hypothetical protein	LC705_00564	hypothetical protein	PEL5_2238	FIG00745255: hypothetical protein	PEL6_1993	FIG00745255: hypothetical protein
LGG_00586	hypothetical protein			LRHK_585	hypothetical protein									LRHMDP2_1191	hypothetical protein	LRHMDP3_651	hypothetical protein	LC705_00565	hypothetical protein
LGG_00587	hypothetical protein			LRHK_586	legume lectin domain protein	LRHM_0564	putative cell surface protein					HMPREF0539_2873	conserved hypothetical protein	LRHMDP2_976	FIG00744190: hypothetical protein	LRHMDP3_2540	FIG00744190: hypothetical protein	LC705_00567	hypothetical protein	PEL5_2240	FIG00744190: hypothetical protein	PEL6_1991	FIG00744190: hypothetical protein
LGG_00588	carboxylate/amino acid/amine transporter	HMPREF0541_00114	putative membrane protein	LRHK_587	eamA-like transporter family protein	LRHM_0565	putative transporter protein	E800_2723	Permease of the drug/metabolite transporter (DMT) superfamily	LRH_02517	permease of the drug/metabolite transporter (DMT) superfamily protein	HMPREF0539_2874	DMT superfamily drug/metabolite transporter	LRHMDP2_977	Permease of the drug/metabolite transporter (DMT) superfamily	LRHMDP3_2539	Permease of the drug/metabolite transporter (DMT) superfamily	LC705_00568	carboxylate/amino acid/amine transporter	PEL5_2241	Permease of the drug/metabolite transporter (DMT) superfamily	PEL6_1990	Permease of the drug/metabolite transporter (DMT) superfamily	R0011_09148	carboxylate/amino acid/amine transporter
LGG_00590	hypothetical protein	HMPREF0541_00115	hypothetical protein	LRHK_589	hypothetical protein	LRHM_0567	hypothetical protein	E800_2725	FIG00746527: hypothetical protein	LRH_02512	hypothetical protein	HMPREF0539_2876	ABC superfamily ATP binding cassette transporter, permease protein	LRHMDP2_979	FIG00746527: hypothetical protein	LRHMDP3_2537	FIG00746527: hypothetical protein	LC705_00569	hypothetical protein	PEL5_2306	FIG00746527: hypothetical protein	PEL6_1688	FIG00746527: hypothetical protein	R0011_09153	hypothetical protein
LGG_00591	ABC transporter ATP-binding protein	HMPREF0541_00116	ABC transporter, ATP-binding protein	LRHK_590	ABC transporter family protein	LRHM_0568	putative multidrug ABC transporter ATP-binding component	E800_2726	ABC-type multidrug transport system, ATPase component	LRH_02507	ABC-type multidrug transport system, ATPase component	HMPREF0539_2877	ABC superfamily ATP binding cassette transporter, ABC protein	LRHMDP2_980	ABC-type multidrug transport system, ATPase component	LRHMDP3_2536	ABC-type multidrug transport system, ATPase component	LC705_00570	ABC transporter ATPase	PEL5_2305	ABC-type multidrug transport system, ATPase component	PEL6_1687	ABC-type multidrug transport system, ATPase component	R0011_09158	ABC transporter ATPase
LGG_00592	membrane protein	HMPREF0541_00117	hypothetical protein	LRHK_591	hypothetical protein	LRHM_0569	hypothetical protein	E800_2727	Substrate-specific component PdxT of predicted pyridoxine ECF transporter	LRH_02502	Predicted membrane protein	HMPREF0539_2878	membrane protein	LRHMDP2_981	Substrate-specific component PdxT of predicted pyridoxine ECF transporter	LRHMDP3_2535	Substrate-specific component PdxT of predicted pyridoxine ECF transporter	LC705_00571	membrane protein	PEL5_2304	Substrate-specific component PdxT of predicted pyridoxine ECF transporter	PEL6_1686	Substrate-specific component PdxT of predicted pyridoxine ECF transporter	R0011_09163	membrane protein
LGG_00594	hypothetical protein					LRHM_0571	hypothetical protein
LGG_00595	pyridoxal/pyridoxine/pyridoxamine kinase	HMPREF0541_02146	phosphomethylpyrimidine kinase	LRHK_592	pfkB carbohydrate kinase family protein	LRHM_0572	pyridoxal kinase	E800_2729	Pyridoxal kinase	LRH_02497	Pyridoxal/pyridoxine/pyridoxamine kinase	HMPREF0539_2879	pyridoxal/pyridoxine/pyridoxamine kinase	LRHMDP2_983	Pyridoxal kinase	LRHMDP3_2533	Pyridoxal kinase	LC705_00572	pyridoxal/pyridoxine/pyridoxamine kinase	PEL5_482	Pyridoxal kinase	PEL6_2316	Pyridoxal kinase	R0011_09173	pyridoxal/pyridoxine/pyridoxamine kinase
LGG_00596	methylenetetrahydrofolate reductase	HMPREF0541_02147	methylenetetrahydrofolate reductase	LRHK_593	5, 10-methylenetetrahydrofolate reductase	LRHM_0573	5,10-methylenetetrahydrofolate reductase	E800_2730	5,10-methylenetetrahydrofolate reductase	LRH_02492	5,10-methylenetetrahydrofolate reductase	HMPREF0539_2880	possible methylenetetrahydrofolate reductase (NAD(P)H)	LRHMDP2_984	5,10-methylenetetrahydrofolate reductase	LRHMDP3_2532	5,10-methylenetetrahydrofolate reductase	LC705_00573	methylenetetrahydrofolate reductase	PEL5_484	5,10-methylenetetrahydrofolate reductase	PEL6_2314	5,10-methylenetetrahydrofolate reductase	R0011_09178	5,10-methylenetetrahydrofolate reductase
LGG_00597	5-methyltetrahydropteroyltriglutamate-- homocysteine methyltransferase	HMPREF0541_02148	5-methyltetrahydropteroyltriglutamate-- homocysteine S-methyltransferase	LRHK_594	5- methyltetrahydropteroyltriglutamate/homocysteine S-methyltransferase	LRHM_0574	5- methyltetrahydropteroyltriglutamate/homocysteine S-methyltransferase	E800_2731	5-methyltetrahydropteroyltriglutamate-- homocysteine methyltransferase	LRH_02487	5-methyltetrahydropteroyltriglutamate-- homocysteine methyltransferase	HMPREF0539_2881	5-methyltetrahydropteroyltriglutamate-- homocysteine S-methyltransferase	LRHMDP2_985	5-methyltetrahydropteroyltriglutamate-- homocysteine methyltransferase	LRHMDP3_2531	5-methyltetrahydropteroyltriglutamate-- homocysteine methyltransferase	LC705_00574	5-methyltetrahydropteroyltriglutamate-- homocysteine methyltransferase	PEL5_485	5-methyltetrahydropteroyltriglutamate-- homocysteine methyltransferase	PEL6_2313	5-methyltetrahydropteroyltriglutamate-- homocysteine methyltransferase	R0011_09183	5-methyltetrahydropteroyltriglutamate-- homocysteine S-methyltransferase
LGG_00598	ABC transporter ATP-binding protein/permease	HMPREF0541_02150	ABC transporter, ATP-binding protein	LRHK_595	ABC transporter	LRHM_0577	putative multidrug ABC transporter ATP-binding and permease components	E800_2732	Lipid A export ATP-binding/permease protein MsbA	LRH_02477	ABC-type multidrug transport system, ATPase and permease component	HMPREF0539_2882	ABC superfamily ATP binding cassette transporter, membrane protein	LRHMDP2_986	Lipid A export ATP-binding/permease protein MsbA	LRHMDP3_2530	Lipid A export ATP-binding/permease protein MsbA	LC705_00576	ABC transporter ATP-binding protein/permease	PEL5_487	Lipid A export ATP-binding/permease protein MsbA	PEL6_2311	Lipid A export ATP-binding/permease protein MsbA	R0011_09193	ABC transporter ATP-binding and permease
LGG_00599	ABC transporter ATP-binding protein/permease	HMPREF0541_02151	ABC transporter, ATP-binding protein	LRHK_596	ABC transporter	LRHM_0578	putative multidrug ABC transporter ATP-binding and permease components	E800_2733	Lipid A export ATP-binding/permease protein MsbA	LRH_02472	ABC-type multidrug transport system, ATPase and permease component	HMPREF0539_2883	ABC superfamily ATP binding cassette transporter, membrane protein	LRHMDP2_987	Lipid A export ATP-binding/permease protein MsbA	LRHMDP3_2529	Lipid A export ATP-binding/permease protein MsbA	LC705_00577	ABC transporter ATP-binding protein/permease	PEL5_488	Lipid A export ATP-binding/permease protein MsbA	PEL6_2310	Lipid A export ATP-binding/permease protein MsbA	R0011_09198	ABC transporter ATP-binding and permease
LGG_00600	transporter major facilitator superfamily MFS_1, oxalate:formate antiporter	HMPREF0541_02152	transporter, major facilitator family protein	LRHK_597	major facilitator superfamily protein	LRHM_0579	transporter protein	E800_2734	Major facilitator:Oxalate:Formate Antiporter	LRH_02467	permease of the major facilitator superfamily protein	HMPREF0539_2885	MFS family major facilitator transporter, oxalate:formate antiporter	LRHMDP2_988	Major facilitator:Oxalate:Formate Antiporter	LRHMDP3_2528	Major facilitator:Oxalate:Formate Antiporter	LC705_00578	MFS superfamily oxalate:formate antiporter	PEL5_489	Major facilitator:Oxalate:Formate Antiporter	PEL6_2309	Major facilitator:Oxalate:Formate Antiporter	R0011_09203	MFS superfamily oxalate:formate antiporter
LGG_00601	trehalose operon repressor	HMPREF0541_02153	trehalose operon repressor	LRHK_598	trehalose operon repressor	LRHM_0580	transcriptional regulator	E800_2735	Trehalose operon transcriptional repressor	LRH_02462	Transcriptional regulator	HMPREF0539_2886	GntR family transcriptional regulator	LRHMDP2_989	Trehalose operon transcriptional repressor	LRHMDP3_2527	Trehalose operon transcriptional repressor	LC705_00579	trehalose operon repressor	PEL5_490	Trehalose operon transcriptional repressor	PEL6_2308	Trehalose operon transcriptional repressor	R0011_09208	trehalose operon repressor
LGG_00602	alpha,alpha-phosphotrehalase (GH13)	HMPREF0541_02154	alpha,alpha-phosphotrehalase	LRHK_599	alpha, alpha-phosphotrehalase	LRHM_0581	trehalose-6-phosphate hydrolase	E800_2736	Trehalose-6-phosphate hydrolase	LRH_02457	alpha, alpha-phosphotrehalase	HMPREF0539_2887	alpha,alpha-phosphotrehalase	LRHMDP2_990	Trehalose-6-phosphate hydrolase	LRHMDP3_2526	Trehalose-6-phosphate hydrolase	LC705_00580	alpha,alpha-phosphotrehalase	PEL5_491	Trehalose-6-phosphate hydrolase	PEL6_2307	Trehalose-6-phosphate hydrolase	R0011_09213	alpha,alpha-phosphotrehalase (GH13)
LGG_00603	PTS system beta-glucoside-specific transporter subunit IIABC	HMPREF0541_02155	phosphotransferase system, EIIC	LRHK_600	PTS system, glucose subfamily, IIA component domain protein	LRHM_0582	PTS system beta-glucoside-specific IIABC components	E800_2737	PTS system, trehalose-specific IIB component / PTS system, trehalose-specific IIC component	LRH_02452	beta-glucoside-specific PTS system IIABC component	HMPREF0539_2888	phosphoenolpyruvate-dependent sugar PTS family porter EIIABC, trhalose specific	LRHMDP2_991	PTS system, trehalose-specific IIB component / PTS system, trehalose-specific IIC component	LRHMDP3_2525	PTS system, trehalose-specific IIB component / PTS system, trehalose-specific IIC component	LC705_00581	PTS system beta-glucoside-specific transporter subunit IIABC	PEL5_492	PTS system, trehalose-specific IIB component / PTS system, trehalose-specific IIC component	PEL6_2306	PTS system, trehalose-specific IIB component / PTS system, trehalose-specific IIC component	R0011_09218	PTS system beta-glucoside-specific transporter subunit IIABC
LGG_00604	serine/threonine transporter SstT	HMPREF0541_02156	putative serine/threonine transporter SstT	LRHK_601	dicarboxylate symporter family protein	LRHM_0583	Na+/H+-dicarboxylate symporter protein	E800_2738	Dicarboxylate/amino acid:cation (Na+ or H+) symporter	LRH_02447	Na+/H+-dicarboxylate symporter	HMPREF0539_2889	DAACS family dicarboxylate/amino acid:sodium (Na+) symporter	LRHMDP2_992	Dicarboxylate/amino acid:cation (Na+ or H+) symporter	LRHMDP3_2524	Dicarboxylate/amino acid:cation (Na+ or H+) symporter	LC705_00583	serine/threonine symporter	PEL5_493	Dicarboxylate/amino acid:cation (Na+ or H+) symporter	PEL6_2305	Dicarboxylate/amino acid:cation (Na+ or H+) symporter	R0011_09223	serine/threonine transporter SstT
LGG_00605	amino acid transporter	HMPREF0541_02157	amino acid permease	LRHK_602	amino acid permease family protein	LRHM_0584	amino acid transporter	E800_2739	Amino acid transporter	LRH_02442	Amino acid transporter	HMPREF0539_2890	APC family amino acid-polyamine-organocation transporter	LRHMDP2_993	Amino acid transporter	LRHMDP3_2523	Amino acid transporter	LC705_00584	amino acid transporter	PEL5_494	Amino acid transporter	PEL6_2304	Amino acid transporter	R0011_09228	amino acid transporter
LGG_00606	L-lactate dehydrogenase	HMPREF0541_02158	L-lactate dehydrogenase	LRHK_603	L-lactate dehydrogenase	LRHM_0585	L-lactate dehydrogenase	E800_2740	L-lactate dehydrogenase	LRH_02437	L-lactate dehydrogenase	HMPREF0539_2891	L-lactate dehydrogenase	LRHMDP2_994	L-lactate dehydrogenase	LRHMDP3_2522	L-lactate dehydrogenase	LC705_00585	L-lactate dehydrogenase	PEL5_495	L-lactate dehydrogenase	PEL6_2303	L-lactate dehydrogenase	R0011_09233	L-lactate dehydrogenase
LGG_00607	glutamate dehydrogenase	HMPREF0541_02159	NAD(P)-specific glutamate dehydrogenase	LRHK_604	glu/Leu/Phe/Val dehydrogenase, dimerization domain protein	LRHM_0595	glutamate dehydrogenase	E800_2741	NADP-specific glutamate dehydrogenase	LRH_02432	glutamate dehydrogenase	HMPREF0539_2892	glutamate dehydrogenase (NADP(+))	LRHMDP2_995	NADP-specific glutamate dehydrogenase	LRHMDP3_2521	NADP-specific glutamate dehydrogenase	LC705_00586	glutamate dehydrogenase	PEL5_496	NADP-specific glutamate dehydrogenase	PEL6_2302	NADP-specific glutamate dehydrogenase	R0011_09238	glutamate dehydrogenase
LGG_00608	cold shock protein	HMPREF0541_02160	cold shock protein	LRHK_605	cold shock protein CspC	LRHM_0594	cold shock protein	E800_2742	Cold shock protein CspA	LRH_02427	Cold shock protein	HMPREF0539_2893	CspA family cold shock transcriptional regulator	LRHMDP2_996	Cold shock protein CspA	LRHMDP3_2520	Cold shock protein CspA	LC705_00587	Cold shock protein	PEL5_497	Cold shock protein CspA	PEL6_2301	Cold shock protein CspA	R0011_09243	cold shock protein
LGG_00609	hypothetical protein	HMPREF0541_01876	hypothetical protein			LRHM_0593	hypothetical protein	E800_2743	Malolactic regulator					LRHMDP2_997	Malolactic regulator	LRHMDP3_2519	Malolactic regulator			PEL5_498	Malolactic regulator	PEL6_2300	Malolactic regulator
LGG_00610	hypothetical protein	HMPREF0541_02162	hypothetical protein	LRHK_606	hypothetical protein	LRHM_0592	hypothetical protein	E800_2744	FIG00750905: hypothetical protein	LRH_02422	hypothetical protein	HMPREF0539_2894	conserved hypothetical protein	LRHMDP2_998	FIG00750905: hypothetical protein	LRHMDP3_2518	FIG00750905: hypothetical protein	LC705_00589	hypothetical protein	PEL5_499	FIG00750905: hypothetical protein	PEL6_2299	FIG00750905: hypothetical protein	R0011_09248	hypothetical protein
LGG_00611	disulfide bond formation regulator	HMPREF0541_02163	OsmC-like protein	LRHK_607	osmC-like family protein	LRHM_0591	putative redox protein	E800_2745	OsmC/Ohr family protein	LRH_02417	Predicted redox protein, regulator of disulfide bond formation	HMPREF0539_2895	redox protein, regulator of disulfide bond formation	LRHMDP2_999	OsmC/Ohr family protein	LRHMDP3_2517	OsmC/Ohr family protein	LC705_00590	redox protein, regulator of disulfide bond formation	PEL5_500	OsmC/Ohr family protein	PEL6_2298	OsmC/Ohr family protein	R0011_09253	redox protein, regulator of disulfide bond formation
LGG_00612	ABC transporter ATP-binding protein	HMPREF0541_02164	ABC transporter, ATP-binding protein	LRHK_608	ABC transporter family protein	LRHM_0590	putative ABC transporter ATP-binding protein	E800_2746	COG0488: ATPase components of ABC transporters with duplicated ATPase domains	LRH_02412	ATPase component of ABC transporter with duplicated ATPase domains	HMPREF0539_2896	ABC superfamily ATP binding cassette transporter, ABC protein Lsa	LRHMDP2_1000	COG0488: ATPase components of ABC transporters with duplicated ATPase domains	LRHMDP3_2516	COG0488: ATPase components of ABC transporters with duplicated ATPase domains	LC705_00591	ABC transporter ATPase	PEL5_501	COG0488: ATPase components of ABC transporters with duplicated ATPase domains	PEL6_2297	COG0488: ATPase components of ABC transporters with duplicated ATPase domains	R0011_09258	ABC transporter ATPase
LGG_00613	hypothetical protein			LRHK_610	hypothetical protein	LRHM_0589	hypothetical protein					HMPREF0539_2897	hypothetical protein					LC705_00593	hypothetical protein
LGG_00614	nucleoside-diphosphate-sugar epimerase	HMPREF0541_02166	NAD dependent epimerase/dehydratase family protein	LRHK_611	NAD dependent epimerase/dehydratase family protein	LRHM_0588	putative epimerase	E800_2747	oxidoreductase ylbE	LRH_02407	Predicted nucleoside-diphosphate-sugar epimerase	HMPREF0539_2898	nucleoside-diphosphate-sugar epimerase	LRHMDP2_1002	oxidoreductase ylbE	LRHMDP3_2515	oxidoreductase ylbE	LC705_00594	nucleoside-diphosphate-sugar epimerase	PEL5_502	oxidoreductase ylbE	PEL6_2296	oxidoreductase ylbE	R0011_09263	nucleoside-diphosphate-sugar epimerase
LGG_00615	aldo/keto reductase	HMPREF0541_02167	oxidoreductase, aldo/keto reductase family protein	LRHK_612	aldo/keto reductase family protein	LRHM_0587	aldo/keto reductase	E800_2748	Aldo/keto reductase family enzyme	LRH_02402	Aldo/keto reductase family enzyme	HMPREF0539_2899	Aldo/keto reductase family enzyme	LRHMDP2_1003	Aldo/keto reductase family enzyme	LRHMDP3_2514	Aldo/keto reductase family enzyme	LC705_00595	aldo/keto reductase	PEL5_503	Aldo/keto reductase family enzyme	PEL6_2295	Aldo/keto reductase family enzyme	R0011_09268	aldo/keto reductase
LGG_00616	amino acid permease	HMPREF0541_02168	putative proline-specific permease ProY	LRHK_613	amino acid permease family protein	LRHM_0586	amino acid transporter protein	E800_2749	Histidine transport protein (permease)	LRH_02397	Amino acid transporter	HMPREF0539_2900	APC family amino acid-polyamine-organocation transporter	LRHMDP2_1004	Histidine transport protein (permease)	LRHMDP3_2513	Histidine transport protein (permease)	LC705_00596	amino acid permease	PEL5_504	Histidine transport protein (permease)	PEL6_2294	Histidine transport protein (permease)	R0011_09273	amino acid permease
LGG_00617	hypothetical protein	HMPREF0541_02169	hypothetical protein	LRHK_614	hypothetical protein	LRHM_0596	hypothetical protein	E800_2750	FIG00749294: hypothetical protein	LRH_02392	hypothetical protein	HMPREF0539_2901	conserved hypothetical protein	LRHMDP2_1005	FIG00749294: hypothetical protein	LRHMDP3_2512	FIG00749294: hypothetical protein	LC705_00597	hypothetical protein	PEL5_505	FIG00749294: hypothetical protein	PEL6_2293	FIG00749294: hypothetical protein	R0011_09278	hypothetical protein
LGG_00618	NhaP-type Na/H and K/H antiporter	HMPREF0541_02170	putative Na+/H+ antiporter	LRHK_615	sodium/hydrogen exchanger family protein	LRHM_0597	Na+/H+ antiporter	E800_2751	Na+/H+ antiporter	LRH_02387	NhaP-type Na+/H+ and K+/H+ antiporter	HMPREF0539_2902	NhaP family Na+/H+ and K+/H+ antiporter	LRHMDP2_1006	Na+/H+ antiporter	LRHMDP3_2511	Na+/H+ antiporter	LC705_00598	NhaP-type Na/H and K/H antiporter	PEL5_506	Na+/H+ antiporter	PEL6_2292	Na+/H+ antiporter	R0011_09283	NhaP-type Na/H and K/H antiporter
LGG_00619	hypothetical protein	HMPREF0541_02171	hypothetical protein	LRHK_616	hypothetical protein	LRHM_0598	hypothetical protein	E800_2752	FIG00744602: hypothetical protein	LRH_02382	hypothetical protein	HMPREF0539_2903	conserved hypothetical protein	LRHMDP2_1007	FIG00744602: hypothetical protein	LRHMDP3_2510	FIG00744602: hypothetical protein	LC705_00599	hypothetical protein	PEL5_507	FIG00744602: hypothetical protein	PEL6_2291	FIG00744602: hypothetical protein	R0011_09288	hypothetical protein
LGG_00620	response regulator of the LytR/AlgR family protein	HMPREF0541_02172	LytTr DNA-binding domain protein	LRHK_617	lytTr DNA-binding domain protein	LRHM_0599	transcriptional regulator	E800_2753	Response regulator of the LytR/AlgR family	LRH_02377	Response regulator of the LytR/AlgR family protein	HMPREF0539_2904	response regulator of the LytR/AlgR family protein	LRHMDP2_1008	Response regulator of the LytR/AlgR family	LRHMDP3_2509	Response regulator of the LytR/AlgR family	LC705_00600	LytR/AlgR family response regulator	PEL5_508	Response regulator of the LytR/AlgR family	PEL6_2290	Response regulator of the LytR/AlgR family	R0011_09293	LytR/AlgR family response regulator
LGG_00621	multidrug ABC transporter permease	HMPREF0541_02173	hypothetical protein	LRHK_618	ABC transporter	LRHM_0600	multidrug ABC transporter permease	E800_2754	ABC-type multidrug transport system, permease component	LRH_02372	ABC-type multidrug transport system, permease component	HMPREF0539_2905	multidrug ABC superfamily ATP binding cassette transporter, permease protein	LRHMDP2_1009	ABC-type multidrug transport system, permease component	LRHMDP3_2508	ABC-type multidrug transport system, permease component	LC705_00601	multidrug ABC transporter permease	PEL5_509	ABC-type multidrug transport system, permease component	PEL6_2289	ABC-type multidrug transport system, permease component	R0011_09298	multidrug ABC transporter permease
LGG_00622	ABC transporter ATP-binding protein	HMPREF0541_02174	ABC transporter, ATP-binding protein	LRHK_619	ABC transporter family protein	LRHM_0601	multidrug ABC transporter ATP-binding component	E800_2755	ABC transporter ATPase component	LRH_02367	ABC-type multidrug transport system, ATPase component	HMPREF0539_2906	ABC superfamily ATP binding cassette transporter, ABC protein	LRHMDP2_1010	ABC transporter ATPase component	LRHMDP3_2507	ABC transporter ATPase component	LC705_00602	ABC transporter ATPase	PEL5_510	ABC transporter ATPase component	PEL6_2288	ABC transporter ATPase component	R0011_09303	ABC transporter ATPase
LGG_00623	alpha/beta hydrolase superfamily protein	HMPREF0541_02175	hypothetical protein	LRHK_620	alpha/beta hydrolase fold family protein	LRHM_0602	putative hydrolase	E800_2756	Cell surface hydrolase, membrane-bound	LRH_02362	alpha/beta hydrolase superfamily protein	HMPREF0539_2907	alpha/beta hydrolase superfamily protein	LRHMDP2_1011	Cell surface hydrolase, membrane-bound	LRHMDP3_2506	Cell surface hydrolase, membrane-bound	LC705_00603	alpha/beta hydrolase superfamily protein	PEL5_511	Cell surface hydrolase, membrane-bound	PEL6_2287	Cell surface hydrolase, membrane-bound	R0011_09308	alpha/beta hydrolase superfamily protein
LGG_00624	carbonic anhydrase	HMPREF0541_02176	carbonate dehydratase, eukaryotic-type	LRHK_621	eukaryotic-type carbonic anhydrase family protein	LRHM_0603	carbonic anhydrase	E800_2757	Carbonic anhydrase	LRH_02357	Carbonic anhydrase	HMPREF0539_2908	carbonate dehydratase	LRHMDP2_1012	Carbonic anhydrase	LRHMDP3_2505	Carbonic anhydrase	LC705_00604	carbonic anhydrase	PEL5_512	Carbonic anhydrase	PEL6_2286	Carbonic anhydrase	R0011_09313	carbonic anhydrase
LGG_00625	hypothetical protein	HMPREF0541_02177	hypothetical protein	LRHK_622	hypothetical protein	LRHM_0604	hypothetical protein	E800_2758	PlcB, ORFX, ORFP, ORFB, ORFA, ldh gene	LRH_02352	hypothetical protein	HMPREF0539_2909	conserved hypothetical protein	LRHMDP2_1013	PlcB, ORFX, ORFP, ORFB, ORFA, ldh gene	LRHMDP3_2504	PlcB, ORFX, ORFP, ORFB, ORFA, ldh gene	LC705_00605	hypothetical protein	PEL5_513	PlcB, ORFX, ORFP, ORFB, ORFA, ldh gene	PEL6_2285	PlcB, ORFX, ORFP, ORFB, ORFA, ldh gene	R0011_09318	hypothetical protein
LGG_00626	hypothetical protein			LRHK_624	hypothetical protein							HMPREF0539_2910	hypothetical protein	LRHMDP2_1014	hypothetical protein	LRHMDP3_2503	hypothetical protein	LC705_00606	hypothetical protein	PEL5_514	hypothetical protein
LGG_00627	NUDIX family hydrolase	HMPREF0541_02178	hydrolase, NUDIX family	LRHK_623	NUDIX domain-containing protein	LRHM_0605	hypothetical protein	E800_2760	NADH pyrophosphatase	LRH_02347	hydrolase, NUDIX family protein	HMPREF0539_2911	NUDIX family hydrolase	LRHMDP2_1015	NADH pyrophosphatase	LRHMDP3_2502	NADH pyrophosphatase	LC705_00607	NUDIX family hydrolase	PEL5_515	NADH pyrophosphatase	PEL6_2283	NADH pyrophosphatase	R0011_09323	NUDIX family hydrolase
LGG_00628	two-component response regulator					LRHM_0606	putative two-component response regulator													PEL5_516	hypothetical protein	PEL6_2282	hypothetical protein
LGG_00629	two component sensor transduction histidine kinase					LRHM_0607	putative two-component sensor kinase													PEL5_517	Two-component sensor kinase ycbM( EC:2.7.3.- )	PEL6_2281	Two-component sensor kinase ycbM( EC:2.7.3.- )
LGG_00630	bacitracin ABC transporter ATP-binding protein					LRHM_0608	putative multidrug ABC transporter ATP-binding component													PEL5_518	ABC transporter, ATP-binding protein	PEL6_2280	ABC transporter, ATP-binding protein
LGG_00631	bacitracin ABC transporter permease					LRHM_0609	hypothetical protein													PEL5_519	hypothetical protein	PEL6_2279	hypothetical protein
LGG_00632	NADPH:quinone reductase-like Zn-dependent oxidoreductase	HMPREF0541_02179	GroES-like protein	LRHK_625	zinc-binding dehydrogenase family protein	LRHM_0610	zinc-binding oxidoreductase	E800_2761	Bifunctional protein: zinc-containing alcohol dehydrogenase; quinone oxidoreductase ( NADPH:quinone reductase); Similar to arginate lyase	LRH_02342	NADPH:quinone reductase related Zn-dependent oxidoreductase	HMPREF0539_2912	nadph:quinone reductase, zeta-crystallin family protein oxidoreductase protein	LRHMDP2_1016	Bifunctional protein: zinc-containing alcohol dehydrogenase; quinone oxidoreductase ( NADPH:quinone reductase); Similar to arginate lyase	LRHMDP3_2501	Bifunctional protein: zinc-containing alcohol dehydrogenase; quinone oxidoreductase ( NADPH:quinone reductase); Similar to arginate lyase	LC705_00608	NADPH:quinone reductase-like Zn-dependent oxidoreductase	PEL5_520	Bifunctional protein: zinc-containing alcohol dehydrogenase; quinone oxidoreductase ( NADPH:quinone reductase); Similar to arginate lyase	PEL6_2278	Bifunctional protein: zinc-containing alcohol dehydrogenase; quinone oxidoreductase ( NADPH:quinone reductase); Similar to arginate lyase	R0011_09328	NADPH:quinone reductase-like Zn-dependent oxidoreductase
LGG_00633	ammonium transporter	HMPREF0541_02180	putative ammonia transporter	LRHK_626	ammonium transporter family protein	LRHM_0611	ammonia transporter protein	E800_2762	Ammonium transporter	LRH_02337	Ammonia permease	HMPREF0539_2913	Amt family ammonia transporter channel	LRHMDP2_1017	Ammonium transporter	LRHMDP3_2500	Ammonium transporter	LC705_00609	ammonium transporter	PEL5_521	Ammonium transporter	PEL6_2277	Ammonium transporter	R0011_09333	ammonium transporter
LGG_00634	Dyp-type peroxidase family protein	HMPREF0541_02181	CRISPR-associated DxTHG motif protein	LRHK_627	peroxidase family protein	LRHM_0612	peroxidase	E800_2763	Predicted dye-decolorizing peroxidase (DyP), encapsulated subgroup	LRH_02332	Predicted iron-dependent peroxidase	HMPREF0539_2914	possible iron-dependent peroxidase	LRHMDP2_1018	Predicted dye-decolorizing peroxidase (DyP), encapsulated subgroup	LRHMDP3_2499	Predicted dye-decolorizing peroxidase (DyP), encapsulated subgroup	LC705_00610	Dyp-type peroxidase family protein	PEL5_522	Predicted dye-decolorizing peroxidase (DyP), encapsulated subgroup	PEL6_2276	Predicted dye-decolorizing peroxidase (DyP), encapsulated subgroup	R0011_09338	Dyp-type peroxidase family protein
LGG_00635	Mg2 transporter-C (MgtC) family protein	HMPREF0541_02182	Mg2+ transporter-C family protein	LRHK_628	mgtC family protein	LRHM_0613	putative Mg2+ transporter protein	E800_2764	Peptide transport system permease protein SapB	LRH_02327	Putative Mg2+ Transporter-C (MgtC) Family	HMPREF0539_2915	Mg2+ transporter-C (MgtC) family protein	LRHMDP2_1019	Peptide transport system permease protein SapB	LRHMDP3_2498	Peptide transport system permease protein SapB	LC705_00611	Mg2 transporter-C (MgtC) family protein	PEL5_523	Peptide transport system permease protein SapB	PEL6_2275	Peptide transport system permease protein SapB	R0011_09343	Mg2 transporter-C (MgtC) family protein
LGG_00636	DNA-entry nuclease	HMPREF0541_02183	hypothetical protein	LRHK_629	DNA-entry nuclease	LRHM_0614	putative prophage nuclease	E800_2765	DNA-entry nuclease (Competence-specific nuclease)	LRH_02322	DNA-entry nuclease	HMPREF0539_2916	DNA-entry nuclease	LRHMDP2_1020	DNA-entry nuclease (Competence-specific nuclease)	LRHMDP3_2497	DNA-entry nuclease (Competence-specific nuclease)	LC705_00612	DNA-entry nuclease	PEL5_524	DNA-entry nuclease (Competence-specific nuclease)	PEL6_2274	DNA-entry nuclease (Competence-specific nuclease)	R0011_09348	DNA-entry nuclease
LGG_00637	hypothetical protein			LRHK_2559	hypothetical protein	LRHM_0616	hypothetical protein	E800_2767	ATP-dependent nuclease, subunit B					LRHMDP2_1022	Alpha-galactosidase	LRHMDP3_2495	Alpha-galactosidase	LC705_00613	hypothetical protein	PEL5_526	Malolactic regulator	PEL6_2272	Malolactic regulator
LGG_00638	ABC transporter ATP-binding protein	HMPREF0541_02186	ABC transporter, ATP-binding protein	LRHK_631	ABC transporter family protein	LRHM_0617	ABC transporter ATP-binding protein	E800_2768	COG0488: ATPase components of ABC transporters with duplicated ATPase domains	LRH_02317	ATPase component of ABC transporter with duplicated ATPase domains	HMPREF0539_2919	ABC superfamily ATP binding cassette transporter, ABC protein	LRHMDP2_1023	COG0488: ATPase components of ABC transporters with duplicated ATPase domains	LRHMDP3_2494	COG0488: ATPase components of ABC transporters with duplicated ATPase domains	LC705_00614	ABC transporter ATPase	PEL5_527	COG0488: ATPase components of ABC transporters with duplicated ATPase domains	PEL6_2271	COG0488: ATPase components of ABC transporters with duplicated ATPase domains	R0011_09353	ABC transporter ATP-binding protein
LGG_00639	hypothetical protein					LRHM_0618	truncated DNA mismatch repair protein MutS
LGG_00640	hypothetical protein	HMPREF0541_02187	MutS domain V protein	LRHK_632	mutS domain V family protein	LRHM_0619	truncated DNA mismatch repair protein MutS	E800_2769	MutS-related protein, family 1	LRH_02312	Mismatch repair ATPase (MutS family) protein	HMPREF0539_2920	DNA mismatch repair protein MutS	LRHMDP2_1024	MutS-related protein, family 1	LRHMDP3_2493	MutS-related protein, family 1	LC705_00615	hypothetical protein	PEL5_528	MutS-related protein, family 1	PEL6_2270	MutS-related protein, family 1	R0011_09358	hypothetical protein
LGG_00641	uracil-DNA glycosylase	HMPREF0541_02188	uracil-DNA glycosylase family protein	LRHK_633	hypothetical protein	LRHM_0620	uracil-DNA glycosylase	E800_2770	Hypothetical protein VC0266 (sugar utilization related?)	LRH_02307	Uracil-DNA glycosylase	HMPREF0539_2921	uracil-DNA glycosylase	LRHMDP2_1025	Hypothetical protein VC0266 (sugar utilization related?)	LRHMDP3_2492	Hypothetical protein VC0266 (sugar utilization related?)	LC705_00616	uracil-DNA glycosylase	PEL5_529	Hypothetical protein VC0266 (sugar utilization related?)	PEL6_2269	Hypothetical protein VC0266 (sugar utilization related?)	R0011_09363	uracil-DNA glycosylase
LGG_00642	glycerol uptake facilitator	HMPREF0541_02189	channel protein, MIP family	LRHK_634	MIP channel s family protein	LRHM_0621	glycerol uptake facilitator protein	E800_2771	Glycerol uptake facilitator protein	LRH_02302	Glycerol uptake facilitator related permease (Major Intrinsic Protein Family)	HMPREF0539_2922	MIP family major intrinsic protein channel protein	LRHMDP2_1026	Glycerol uptake facilitator protein	LRHMDP3_2491	Glycerol uptake facilitator protein	LC705_00617	glycerol uptake facilitator	PEL5_531	Glycerol uptake facilitator protein	PEL6_2267	Glycerol uptake facilitator protein	R0011_09368	glycerol uptake facilitator
LGG_00643	alpha-glycerophosphate oxidase	HMPREF0541_02190	FAD dependent oxidoreductase	LRHK_635	alpha-Glycerophosphate Oxidase	LRHM_0622	glycerol-3-phosphate dehydrogenase	E800_2772	Aerobic glycerol-3-phosphate dehydrogenase	LRH_02297	Glycerol-3-phosphate dehydrogenase	HMPREF0539_2923	glycerol-3-phosphate oxidase	LRHMDP2_1027	Aerobic glycerol-3-phosphate dehydrogenase	LRHMDP3_2490	Aerobic glycerol-3-phosphate dehydrogenase	LC705_00618	alpha-glycerophosphate oxidase	PEL5_532	Aerobic glycerol-3-phosphate dehydrogenase	PEL6_2266	Aerobic glycerol-3-phosphate dehydrogenase	R0011_09373	alpha-glycerophosphate oxidase
LGG_00644	glycerol kinase	HMPREF0541_02191	glycerol kinase	LRHK_636	glycerol kinase	LRHM_0623	glycerol kinase	E800_2773	Glycerol kinase	LRH_02292	glycerol kinase	HMPREF0539_2924	glycerol kinase	LRHMDP2_1028	Glycerol kinase	LRHMDP3_2489	Glycerol kinase	LC705_00619	glycerol kinase	PEL5_533	Glycerol kinase	PEL6_2265	Glycerol kinase	R0011_09378	glycerol kinase
LGG_00645	glycosyl transferase, group 2	HMPREF0541_02193	glycosyltransferase, group 2 family protein	LRHK_637	glycosyl transferase 2 family protein	LRHM_0624	putative glycosyltransferase	E800_2774	glycosyltransferase	LRH_02287	glycosyltransferase	HMPREF0539_2925	glycosyltransferase	LRHMDP2_1029	glycosyltransferase	LRHMDP3_2488	glycosyltransferase	LC705_00620	glycosyl transferase group 2	PEL5_534	glycosyltransferase	PEL6_2264	glycosyltransferase	R0011_09383	glycosyl transferase group 2
LGG_00646	hypothetical protein					LRHM_0625	hypothetical protein
LGG_00647	hypothetical protein					LRHM_0626	hypothetical protein													PEL5_536	hypothetical protein	PEL6_2262	hypothetical protein
LGG_00648	transcription antiterminator Lact	HMPREF0541_02195	PRD domain protein	LRHK_639	PRD domain-containing protein	LRHM_0627	putative transcriptional regulator	E800_2776	Beta-glucoside bgl operon antiterminator, BglG family	LRH_02277	beta-glucoside operon antiterminator	HMPREF0539_2928	transcriptional antiterminator	LRHMDP2_1031	Beta-glucoside bgl operon antiterminator, BglG family	LRHMDP3_2486	Beta-glucoside bgl operon antiterminator, BglG family	LC705_00621	transcription antiterminator Lact	PEL5_537	Beta-glucoside bgl operon antiterminator, BglG family	PEL6_2261	Beta-glucoside bgl operon antiterminator, BglG family	R0011_09393	transcription antiterminator lacT
LGG_00649	PTS system lactose-specific transporter subunit IIBC	HMPREF0541_02196	PTS system, lactose-specific IIC component	LRHK_640	PTS system, lactose-specific IIC component	LRHM_0628	PTS system lactose-specific IIBC components	E800_2777	PTS system, lactose-specific IIB component / PTS system, lactose-specific IIC component			HMPREF0539_2929	protein-N(pi)-phosphohistidine--sugar phosphotransferase	LRHMDP2_1032	PTS system, lactose-specific IIB component / PTS system, lactose-specific IIC component	LRHMDP3_2485	PTS system, lactose-specific IIB component / PTS system, lactose-specific IIC component	LC705_00622	PTS system lactose-specific transporter subunit IIBC	PEL5_538	PTS system, lactose-specific IIB component / PTS system, lactose-specific IIC component	PEL6_2260	PTS system, lactose-specific IIB component / PTS system, lactose-specific IIC component	R0011_09398	PTS system lactose-specific transporter subunit IIBC
LGG_00650	6-phospho-beta-galactosidase (Fragment) (GH1)	HMPREF0541_02197	6-phospho-beta-galactosidase	LRHK_641	6-phospho-beta-galactosidase	LRHM_0629	truncated 6-phospho-beta-galactosidase	E800_2778	6-phospho-beta-galactosidase	LRH_02262	6-phospho-beta-galactosidase	HMPREF0539_2930	6-phospho-beta-galactosidase	LRHMDP2_1033	6-phospho-beta-galactosidase	LRHMDP3_2484	6-phospho-beta-galactosidase	LC705_00623	6-phospho-beta-galactosidase	PEL5_539	6-phospho-beta-galactosidase	PEL6_2259	6-phospho-beta-galactosidase	R0011_09403	6-phospho-beta-galactosidase
LGG_00651	6-phospho-beta-galactosidase (Fragment) (GH1)					LRHM_0630	truncated 6-phospho-beta-galactosidase
LGG_00652	PTS system lactose-specific transporter subunit IIA	HMPREF0541_02198	lactose-specific phosphotransferase enzyme IIA component	LRHK_642	lactose-specific phosphotransferase enzyme IIA component	LRHM_0631	PTS system lactose-specific IIA component	E800_2779	PTS system, lactose-specific IIA component	LRH_02257	cellobiose-specific PTS system IIA component	HMPREF0539_2931	PTS family lactose-N,N-diacetylchitobiose-beta-glucoside (lac) porter component IIA	LRHMDP2_1034	PTS system, lactose-specific IIA component	LRHMDP3_2483	PTS system, lactose-specific IIA component	LC705_00624	PTS system lactose-specific transporter subunit IIA	PEL5_540	PTS system, lactose-specific IIA component	PEL6_2258	PTS system, lactose-specific IIA component	R0011_09408	PTS system lactose-specific transporter subunit IIA
LGG_00653	galactokinase	HMPREF0541_02199	galactokinase	LRHK_643	galactokinase	LRHM_0632	galactokinase	E800_2780	Galactokinase	LRH_02247	Galactokinase	HMPREF0539_2933	galactokinase	LRHMDP2_1035	Galactokinase	LRHMDP3_2482	Galactokinase	LC705_00625	galactokinase	PEL5_541	Galactokinase	PEL6_2257	Galactokinase	R0011_09418	galactokinase
LGG_00654	UDP-glucose 4-epimerase	HMPREF0541_02200	UDP-glucose 4-epimerase	LRHK_644	UDP-glucose 4-epimerase	LRHM_0633	UDP-glucose 4-epimerase	E800_2781	UDP-glucose 4-epimerase	LRH_02242	UDP-glucose 4-epimerase	HMPREF0539_2934	UDP-glucose 4-epimerase	LRHMDP2_1036	UDP-glucose 4-epimerase	LRHMDP3_2481	UDP-glucose 4-epimerase	LC705_00626	UDP-glucose 4-epimerase	PEL5_542	UDP-glucose 4-epimerase	PEL6_2256	UDP-glucose 4-epimerase	R0011_09423	UDP-glucose 4-epimerase
LGG_00655	galactose-1-phosphate uridylyltransferase	HMPREF0541_02201	UTP--hexose-1-phosphate uridylyltransferase	LRHK_645	galactose-1-phosphate uridylyltransferase	LRHM_0634	galactose-1-phosphate uridylyltransferase	E800_2782	Galactose-1-phosphate uridylyltransferase	LRH_02237	galactose-1-phosphate uridylyltransferase	HMPREF0539_2935	UDP-glucose--hexose-1-phosphate uridylyltransferase	LRHMDP2_1037	Galactose-1-phosphate uridylyltransferase	LRHMDP3_2480	Galactose-1-phosphate uridylyltransferase	LC705_00627	galactose-1-phosphate uridylyltransferase	PEL5_543	Galactose-1-phosphate uridylyltransferase	PEL6_2255	Galactose-1-phosphate uridylyltransferase	R0011_09428	galactose-1-phosphate uridylyltransferase
LGG_00656	galactose operon repressor	HMPREF0541_02202	transcriptional regulator, LacI family	LRHK_646	bacterial regulatory s, lacI family protein	LRHM_0635	galactose operon repressor	E800_2783	Galactose operon repressor, GalR-LacI family of transcriptional regulators	LRH_02232	transcription regulator of beta-galactosidase gene	HMPREF0539_2936	LacI family transcriptional regulator LacR	LRHMDP2_1038	Galactose operon repressor, GalR-LacI family of transcriptional regulators	LRHMDP3_2479	Galactose operon repressor, GalR-LacI family of transcriptional regulators	LC705_00628	galactose operon repressor	PEL5_544	Galactose operon repressor, GalR-LacI family of transcriptional regulators	PEL6_2254	Galactose operon repressor, GalR-LacI family of transcriptional regulators	R0011_09433	galactose operon repressor
LGG_00657	aldose 1-epimerase	HMPREF0541_02203	aldose 1-epimerase	LRHK_647	galactose-1-epimerase	LRHM_0636	aldose 1-epimerase	E800_2784	Aldose 1-epimerase	LRH_02227	aldose 1-epimerase	HMPREF0539_2937	possible aldose 1-epimerase	LRHMDP2_1039	Aldose 1-epimerase	LRHMDP3_2478	Aldose 1-epimerase	LC705_00629	aldose 1-epimerase	PEL5_545	Aldose 1-epimerase	PEL6_2253	Aldose 1-epimerase	R0011_09438	aldose 1-epimerase
LGG_00658	hypothetical protein			LRHK_648	hypothetical protein			E800_2785	FIG00747084: hypothetical protein	LRH_02222	hypothetical protein	HMPREF0539_2938	conserved hypothetical protein	LRHMDP2_1040	FIG00747084: hypothetical protein	LRHMDP3_2477	FIG00747084: hypothetical protein	LC705_00630	hypothetical protein	PEL5_546	FIG00747084: hypothetical protein	PEL6_2252	FIG00747084: hypothetical protein	R0011_09443	hypothetical protein
LGG_00659	PTS system galactose-specific transporter subunit IIC			LRHK_652	PTS system sugar-specific permease component family protein	LRHM_0637	PTS system IIC component					HMPREF0539_2942	PTS family galactitol (gat) porter component IIC	LRHMDP2_1043	PTS system, galactose-specific IIC component	LRHMDP3_2474	PTS system, galactose-specific IIC component	LC705_00633	PTS system galactose-specific transporter subunit IIC	PEL5_547	PTS system, galactose-specific IIC component	PEL6_2251	PTS system, galactose-specific IIC component
LGG_00660	hypothetical protein			LRHK_653	hypothetical protein	LRHM_0638	hypothetical protein					HMPREF0539_2943	hypothetical protein	LRHMDP2_1044	hypothetical protein	LRHMDP3_2473	hypothetical protein	LC705_00634	hypothetical protein	PEL5_548	hypothetical protein	PEL6_2250	hypothetical protein
LGG_00661	hypothetical protein			LRHK_654	hypothetical protein	LRHM_0639	hypothetical protein					HMPREF0539_2944	conserved hypothetical protein	LRHMDP2_1045	FIG00745652: hypothetical protein	LRHMDP3_2472	FIG00745652: hypothetical protein	LC705_00635	hypothetical protein	PEL5_549	FIG00745652: hypothetical protein	PEL6_2249	FIG00745652: hypothetical protein
LGG_00662	beta-lactamase class C-like penicillin binding protein	HMPREF0541_02214	beta-lactamase	LRHK_655	beta-lactamase family protein	LRHM_0640	putative beta-lactamase	E800_2792	FIG00746284: hypothetical protein	LRH_02187	Beta-lactamase class C related penicillin binding protein	HMPREF0539_2945	serine family D-Ala-D-Ala carboxypeptidase	LRHMDP2_1046	FIG00746284: hypothetical protein	LRHMDP3_2471	FIG00746284: hypothetical protein	LC705_00636	beta-lactamase class C-like penicillin binding protein	PEL5_550	FIG00746284: hypothetical protein	PEL6_2248	FIG00746284: hypothetical protein	R0011_09478	beta-lactamase class C-like penicillin binding protein
LGG_00663	hypothetical protein	HMPREF0541_02215	hypothetical protein	LRHK_656	hypothetical protein	LRHM_0641	hypothetical protein	E800_2793	FIG00744856: hypothetical protein	LRH_02182	hypothetical protein	HMPREF0539_2946	conserved hypothetical protein	LRHMDP2_1048	FIG00744856: hypothetical protein	LRHMDP3_2469	FIG00744856: hypothetical protein	LC705_00637	hypothetical protein	PEL5_551	FIG00744856: hypothetical protein	PEL6_2247	FIG00744856: hypothetical protein	R0011_09483	hypothetical protein
LGG_00664	tagatose-6-phosphate kinase	HMPREF0541_02216	tagatose-6-phosphate kinase	LRHK_657	tagatose-6-phosphate kinase	LRHM_0642	tagatose-6-phosphate kinase	E800_2794	Tagatose-6-phosphate kinase / 1-phosphofructokinase	LRH_02177	tagatose-6-phosphate kinase	HMPREF0539_2947	tagatose-6-phosphate kinase	LRHMDP2_1049	Tagatose-6-phosphate kinase / 1-phosphofructokinase	LRHMDP3_2468	Tagatose-6-phosphate kinase / 1-phosphofructokinase	LC705_00638	tagatose-6-phosphate kinase	PEL5_552	Tagatose-6-phosphate kinase / 1-phosphofructokinase	PEL6_2246	Tagatose-6-phosphate kinase / 1-phosphofructokinase	R0011_09488	tagatose-6-phosphate kinase
LGG_00665	tagatose 1,6-diphosphate aldolase	HMPREF0541_02218	tagatose-bisphosphate aldolase domain protein	LRHK_658	deoC/LacD aldolase family protein	LRHM_0643	tagatose-1,6-bisphosphate aldolase	E800_2795	Tagatose 1,6-bisphosphate aldolase	LRH_02172	Tagatose-1,6-bisphosphate aldolase	HMPREF0539_2948	tagatose-bisphosphate aldolase	LRHMDP2_1050	Tagatose 1,6-bisphosphate aldolase	LRHMDP3_2467	Tagatose 1,6-bisphosphate aldolase	LC705_00639	tagatose 1,6-diphosphate aldolase	PEL5_553	Tagatose 1,6-bisphosphate aldolase	PEL6_2245	Tagatose 1,6-bisphosphate aldolase	R0011_09493	tagatose 1,6-diphosphate aldolase
LGG_00666	galactose-6-phosphate isomerase subunit LacB	HMPREF0541_02219	sugar-phosphate isomerase, RpiB/LacA/LacB family	LRHK_659	galactose-6-phosphate isomerase subunit lacB	LRHM_0644	galactose 6-phosphate isomerase subunit LacB	E800_2796	Galactose-6-phosphate isomerase, LacB subunit	LRH_02167	galactose-6-phosphate isomerase subunit LacB	HMPREF0539_2949	galactose-6-phosphate isomerase	LRHMDP2_1051	Galactose-6-phosphate isomerase, LacB subunit	LRHMDP3_2466	Galactose-6-phosphate isomerase, LacB subunit	LC705_00640	galactose-6-phosphate isomerase subunit LacB	PEL5_554	Galactose-6-phosphate isomerase, LacB subunit	PEL6_2244	Galactose-6-phosphate isomerase, LacB subunit	R0011_09498	galactose-6-phosphate isomerase subunit LacB
LGG_00667	galactose-6-phosphate isomerase subunit LacA	HMPREF0541_02220	sugar-phosphate isomerase, RpiB/LacA/LacB family	LRHK_660	galactose-6-phosphate isomerase subunit lacA	LRHM_0645	galactose 6-phosphate isomerase subunit LacA	E800_2797	Galactose-6-phosphate isomerase, LacA subunit	LRH_02162	galactose-6-phosphate isomerase subunit LacA	HMPREF0539_2950	galactose-6-phosphate isomerase	LRHMDP2_1052	Galactose-6-phosphate isomerase, LacA subunit	LRHMDP3_2465	Galactose-6-phosphate isomerase, LacA subunit	LC705_00641	galactose-6-phosphate isomerase subunit LacA	PEL5_555	Galactose-6-phosphate isomerase, LacA subunit	PEL6_2243	Galactose-6-phosphate isomerase, LacA subunit	R0011_09503	galactose-6-phosphate isomerase subunit LacA
LGG_00668	lactose phosphotransferase system repressor	HMPREF0541_02221	transcriptional regulator, DeoR family	LRHK_661	bacterial regulatory s, deoR family protein	LRHM_0646	lactose transport repressor	E800_2798	Lactose phosphotransferase system repressor	LRH_02157	lactose transport regulator	HMPREF0539_2951	DeoR family transcriptional regulator	LRHMDP2_1053	Lactose phosphotransferase system repressor	LRHMDP3_2464	Lactose phosphotransferase system repressor	LC705_00642	lactose phosphotransferase system repressor	PEL5_556	Lactose phosphotransferase system repressor	PEL6_2242	Lactose phosphotransferase system repressor	R0011_09508	lactose phosphotransferase system repressor
LGG_00669	phosphatase	HMPREF0541_02223	HAD hydrolase, family IA, variant 1	LRHK_662	HAD hydrolase family protein	LRHM_0647	putative phosphatase	E800_2799	Haloacid dehalogenase-like hydrolase	LRH_02152	Predicted phosphatase	HMPREF0539_2952	possible inorganic diphosphatase	LRHMDP2_1055	Haloacid dehalogenase-like hydrolase	LRHMDP3_2462	Haloacid dehalogenase-like hydrolase	LC705_00643	phosphatase	PEL5_557	Haloacid dehalogenase-like hydrolase	PEL6_2241	Haloacid dehalogenase-like hydrolase	R0011_09513	phosphatase
LGG_00670	exonuclease	HMPREF0541_02224	exonuclease SbcCD, D subunit	LRHK_663	exonuclease SbcCD subunit D	LRHM_0648	exonuclease SbcD	E800_2800	Exonuclease SbcD	LRH_02147	DNA repair exonuclease	HMPREF0539_2953	exonuclease SbcD	LRHMDP2_1056	Exonuclease SbcD	LRHMDP3_2461	Exonuclease SbcD	LC705_00644	exonuclease	PEL5_558	Exonuclease SbcD	PEL6_2240	Exonuclease SbcD	R0011_09518	exonuclease SbcD
LGG_00671	DNA repair ATPase	HMPREF0541_02225	putative DNA sulfur modification protein DndD	LRHK_664	exonuclease	LRHM_0649	exonuclease SbcC	E800_2801	Exonuclease SbcC	LRH_02142	DNA repair ATPase	HMPREF0539_2954	exonuclease	LRHMDP2_1057	Exonuclease SbcC	LRHMDP3_2460	Exonuclease SbcC	LC705_00645	DNA repair ATPase SbcC	PEL5_559	Exonuclease SbcC	PEL6_2239	Exonuclease SbcC	R0011_09523	DNA repair ATPase
LGG_00672	hypothetical protein
LGG_00673	hypothetical protein	HMPREF0541_02226	hypothetical protein	LRHK_665	hypothetical protein	LRHM_0650	hypothetical protein	E800_2802	FIG00750619: hypothetical protein	LRH_02137	hypothetical protein	HMPREF0539_2955	conserved hypothetical protein	LRHMDP2_1058	FIG00750619: hypothetical protein	LRHMDP3_2459	FIG00750619: hypothetical protein			PEL5_561	FIG00750619: hypothetical protein	PEL6_2237	FIG00750619: hypothetical protein	R0011_09528	hypothetical protein
LGG_00674	hypothetical protein					LRHM_0651	hypothetical protein							LRHMDP2_1059	ATP-dependent nuclease, subunit B	LRHMDP3_2458	ATP-dependent nuclease, subunit B	LC705_00646	hypothetical protein	PEL5_562	Malolactic regulator	PEL6_2236	Malolactic regulator
LGG_00675	small heat shock protein	HMPREF0541_02229	Hsp20/alpha crystallin family protein	LRHK_666	hsp20/alpha crystallin family protein	LRHM_0652	small heat shock protein	E800_2804	Molecular chaperone (small heat shock protein)	LRH_02132	Molecular chaperone (small heat shock protein)	HMPREF0539_2956	molecular chaperone (small heat shock protein)	LRHMDP2_1060	Molecular chaperone (small heat shock protein)	LRHMDP3_2457	Molecular chaperone (small heat shock protein)	LC705_00647	small heat shock protein	PEL5_563	Molecular chaperone (small heat shock protein)	PEL6_2235	Molecular chaperone (small heat shock protein)	R0011_09533	small heat shock protein
LGG_00676	A/G-specific adenine glycosylase	HMPREF0541_02230	A/G-specific adenine glycosylase	LRHK_667	A/G-specific adenine glycosylase	LRHM_0653	A/G-specific DNA glycosylase	E800_2805	A/G-specific adenine glycosylase	LRH_02127	A/G-specific DNA glycosylase	HMPREF0539_2957	A/G-specific adenine glycosylase	LRHMDP2_1061	A/G-specific adenine glycosylase	LRHMDP3_2456	A/G-specific adenine glycosylase	LC705_00648	A/G-specific adenine glycosylase	PEL5_564	A/G-specific adenine glycosylase	PEL6_2234	A/G-specific adenine glycosylase	R0011_09538	A/G-specific adenine glycosylase
LGG_00677	esterase/lipase	HMPREF0541_02232	hydrolase, alpha/beta domain protein	LRHK_668	alpha/beta hydrolase fold family protein	LRHM_0654	esterase	E800_2806	Esterase/lipase	LRH_02122	Esterase/lipase	HMPREF0539_2958	esterase/lipase	LRHMDP2_1062	Esterase/lipase	LRHMDP3_2455	Esterase/lipase	LC705_00649	esterase/lipase	PEL5_565	Esterase/lipase	PEL6_2233	Esterase/lipase	R0011_09543	esterase/lipase
LGG_00678	NAD(P)H oxidoreductase	HMPREF0541_02233	flavodoxin-like protein	LRHK_669	flavodoxin-like fold family protein	LRHM_0655	NAD(P)H dehydrogenase	E800_2807	NAD(P)H oxidoreductase YRKL @ Putative NADPH-quinone reductase (modulator of drug activity B) @ Flavodoxin 2	LRH_02117	Putative NADPH-quinone reductase (modulator of drug activity B)	HMPREF0539_2959	possible NADPH dehydrogenase	LRHMDP2_1063	NAD(P)H oxidoreductase YRKL @ Putative NADPH-quinone reductase (modulator of drug activity B) @ Flavodoxin 2	LRHMDP3_2454	NAD(P)H oxidoreductase YRKL @ Putative NADPH-quinone reductase (modulator of drug activity B) @ Flavodoxin 2	LC705_00650	NAD(P)H oxidoreductase	PEL5_566	NAD(P)H oxidoreductase YRKL @ Putative NADPH-quinone reductase (modulator of drug activity B) @ Flavodoxin 2	PEL6_2232	NAD(P)H oxidoreductase YRKL @ Putative NADPH-quinone reductase (modulator of drug activity B) @ Flavodoxin 2	R0011_09548	NAD(P)H oxidoreductase
LGG_00679	hypothetical protein	HMPREF0541_02234	hypothetical protein	LRHK_670	hypothetical protein	LRHM_0656	hypothetical protein	E800_2808	FIG00744681: hypothetical protein	LRH_02112	hypothetical protein	HMPREF0539_2960	conserved hypothetical protein	LRHMDP2_1064	FIG00744681: hypothetical protein	LRHMDP3_2453	FIG00744681: hypothetical protein	LC705_00651	hypothetical protein	PEL5_567	FIG00744681: hypothetical protein	PEL6_2231	FIG00744681: hypothetical protein	R0011_09553	hypothetical protein
LGG_00680	hypothetical protein	HMPREF0541_02235	hypothetical protein	LRHK_672	hypothetical protein	LRHM_0657	hypothetical protein	E800_2809	FIG00750569: hypothetical protein	LRH_02107	hypothetical protein	HMPREF0539_2961	conserved hypothetical protein	LRHMDP2_1065	FIG00750569: hypothetical protein	LRHMDP3_2452	FIG00750569: hypothetical protein	LC705_00652	hypothetical protein	PEL5_569	FIG00750569: hypothetical protein	PEL6_2229	FIG00750569: hypothetical protein	R0011_09558	hypothetical protein
LGG_00681	phosphomethylpyrimidine kinase	HMPREF0541_02236	phosphomethylpyrimidine kinase	LRHK_673	phosphomethylpyrimidine kinase	LRHM_0658	hydroxymethylpyrimidine/phosphomethylpyrimidine kinase	E800_2810	Hydroxymethylpyrimidine phosphate kinase ThiD	LRH_02102	Hydroxymethylpyrimidine/phosphomethylpyrimidine kinase	HMPREF0539_2962	phosphomethylpyrimidine kinase	LRHMDP2_1066	Hydroxymethylpyrimidine phosphate kinase ThiD	LRHMDP3_2451	Hydroxymethylpyrimidine phosphate kinase ThiD	LC705_00653	phosphomethylpyrimidine kinase	PEL5_570	Hydroxymethylpyrimidine phosphate kinase ThiD	PEL6_2228	Hydroxymethylpyrimidine phosphate kinase ThiD	R0011_09563	phosphomethylpyrimidine kinase
LGG_00682	hypothetical protein	HMPREF0541_02237	hypothetical protein	LRHK_674	hypothetical protein	LRHM_0659	hypothetical protein	E800_2811	FIG00746368: hypothetical protein	LRH_02097	hypothetical protein	HMPREF0539_2963	conserved hypothetical protein	LRHMDP2_1067	FIG00746368: hypothetical protein	LRHMDP3_2450	FIG00746368: hypothetical protein	LC705_00654	hypothetical protein	PEL5_571	FIG00746368: hypothetical protein	PEL6_2227	FIG00746368: hypothetical protein	R0011_09568	hypothetical protein
LGG_00683	hypothetical protein	HMPREF0541_02238	hypothetical protein	LRHK_675	hypothetical protein	LRHM_0660	hypothetical protein	E800_2812	Exonuclease SbcC	LRH_02092	hypothetical protein	HMPREF0539_2964	conserved hypothetical protein	LRHMDP2_1068	Exonuclease SbcC	LRHMDP3_2449	Exonuclease SbcC	LC705_00655	hypothetical protein	PEL5_572	Exonuclease SbcC	PEL6_2226	Exonuclease SbcC	R0011_09573	hypothetical protein
LGG_00684	NADH-flavin reductase	HMPREF0541_02239	hypothetical protein	LRHK_676	putative NADH-flavin reductase	LRHM_0661	putative NADH-flavin reductase	E800_2813	Rrf2-linked NADH-flavin reductase	LRH_02087	Putative NADH-flavin reductase	HMPREF0539_2965	possible FMN reductase	LRHMDP2_1069	Rrf2-linked NADH-flavin reductase	LRHMDP3_2448	Rrf2-linked NADH-flavin reductase	LC705_00656	NADH-flavin reductase	PEL5_573	Rrf2-linked NADH-flavin reductase	PEL6_2225	Rrf2-linked NADH-flavin reductase	R0011_09578	NADH-flavin reductase
LGG_00685	beta-glucosidase (GH3)	HMPREF0541_02241	glycosyl hydrolase family 3 protein	LRHK_678	thermostable beta-glucosidase B	LRHM_0663	glycosyl hydrolase	E800_2816	Beta-glucosidase	LRH_02082	Beta-glucosidase-related glycosidase	HMPREF0539_2967	beta-glucosidase	LRHMDP2_1071	Beta-glucosidase	LRHMDP3_2446	Beta-glucosidase	LC705_00657	beta-glucosidase	PEL5_574	Beta-glucosidase	PEL6_2224	Beta-glucosidase	R0011_09583	beta-glucosidase (GH3)
LGG_00686	hypothetical protein	HMPREF0541_02242	hypothetical protein	LRHK_679	hypothetical protein	LRHM_0664	hypothetical protein	E800_2817	FIG00746961: hypothetical protein	LRH_02077	hypothetical protein	HMPREF0539_2968	conserved hypothetical protein	LRHMDP2_1072	FIG00746961: hypothetical protein	LRHMDP3_2445	FIG00746961: hypothetical protein	LC705_00658	hypothetical protein	PEL5_575	FIG00746961: hypothetical protein	PEL6_2223	FIG00746961: hypothetical protein	R0011_09588	hypothetical protein
LGG_00687	ABC transporter substrate-binding protein	HMPREF0541_02243	ABC transporter substrate binding protein	LRHK_682	ABC transporter substrate binding family protein	LRHM_0665	ABC transporter substrate binding component	E800_2818	ABC-type uncharacterized transport system, periplasmic component	LRH_02072	ABC-type uncharacterized transport system, periplasmic component	HMPREF0539_2971	ATP-binding cassette transporter	LRHMDP2_1073	ABC-type uncharacterized transport system, periplasmic component	LRHMDP3_2444	ABC-type uncharacterized transport system, periplasmic component	LC705_00660	ABC transporter substrate-binding protein	PEL5_576	ABC-type uncharacterized transport system, periplasmic component	PEL6_2222	ABC-type uncharacterized transport system, periplasmic component	R0011_09593	ABC transporter substrate-binding protein
LGG_00688	ABC transporter substrate-binding protein							E800_2819	hypothetical protein			HMPREF0539_2972	hypothetical protein							PEL5_577	hypothetical protein	PEL6_2221	hypothetical protein
LGG_00689	ABC transporter substrate-binding protein	HMPREF0541_02245	ABC transporter substrate binding protein	LRHK_683	ABC transporter substrate binding family protein	LRHM_0666	ABC transporter substrate binding component	E800_2820	ABC transporter substrate-binding protein	LRH_02062	ABC-type uncharacterized transport system, periplasmic component			LRHMDP2_1074	ABC transporter substrate-binding protein	LRHMDP3_2443	ABC transporter substrate-binding protein	LC705_00661	ABC transporter substrate-binding protein	PEL5_578	ABC transporter substrate-binding protein	PEL6_2220	ABC transporter substrate-binding protein	R0011_09598	ABC transporter substrate-binding protein
LGG_00690	ABC transporter permease	HMPREF0541_02246	branched-chain amino acid ABC transporter, permease protein	LRHK_684	branched-chain amino acid transport system / permease component family protein	LRHM_0667	ABC transporter permease	E800_2821	ABC transporter permease protein	LRH_02057	ABC-type uncharacterized transport system, permease component	HMPREF0539_2974	ABC superfamily ATP binding cassette transporter, membrane protein	LRHMDP2_1075	ABC transporter permease protein	LRHMDP3_2442	ABC transporter permease protein	LC705_00662	ABC transporter permease	PEL5_579	ABC transporter permease protein	PEL6_2219	ABC transporter permease protein	R0011_09603	ABC transporter permease
LGG_00691	ABC transporter ATP-binding protein	HMPREF0541_02247	ABC transporter, ATP-binding protein	LRHK_685	ABC transporter family protein	LRHM_0668	ABC transporter ATP-binding protein	E800_2822	Methionine ABC transporter ATP-binding protein	LRH_02052	ABC-type uncharacterized transport system, ATPase component	HMPREF0539_2975	ABC superfamily ATP binding cassette transporter, ABC protein	LRHMDP2_1076	Methionine ABC transporter ATP-binding protein	LRHMDP3_2441	Methionine ABC transporter ATP-binding protein	LC705_00663	ABC transporter ATPase	PEL5_580	Methionine ABC transporter ATP-binding protein	PEL6_2218	Methionine ABC transporter ATP-binding protein	R0011_09608	ABC transporter ATPase
LGG_00692	zinc-binding alcohol dehydrogenase	HMPREF0541_02248	quinone oxidoreductase, YhdH/YhfP family	LRHK_686	putative quinone oxidoreductase YhfP	LRHM_0669	oxidoreductase	E800_2823	Alcohol dehydrogenase	LRH_02047	NADPH:quinone reductase related Zn-dependent oxidoreductase	HMPREF0539_2976	alcohol dehydrogenase	LRHMDP2_1077	Alcohol dehydrogenase	LRHMDP3_2440	Alcohol dehydrogenase	LC705_00664	zinc-binding alcohol dehydrogenase	PEL5_581	Alcohol dehydrogenase	PEL6_2217	Alcohol dehydrogenase	R0011_09613	zinc-binding alcohol dehydrogenase
LGG_00693	cation-transporting ATPase	HMPREF0541_02249	putative calcium-translocating P-type ATPase, PMCA-type	LRHK_687	HAD ATPase, P-type, IC family protein	LRHM_0670	cation transport ATPase	E800_2824	cation-transporting ATPase	LRH_02042	Cation transport ATPase	HMPREF0539_2977	possible calcium-transporting ATPase	LRHMDP2_1078	cation-transporting ATPase	LRHMDP3_2439	cation-transporting ATPase	LC705_00665	cation-transporting ATPase	PEL5_583	cation-transporting ATPase	PEL6_2215	cation-transporting ATPase	R0011_09618	cation-transporting ATPase
LGG_00694	hypothetical protein					LRHM_0671	hypothetical protein													PEL5_584	hypothetical protein	PEL6_2214	hypothetical protein
LGG_00695	glycosyl transferase, group 2	HMPREF0541_02250	putative bactoprenol glucosyl transferase	LRHK_688	glycosyl transferase 2 family protein	LRHM_0672	glycosyltransferase	E800_2825	Glycosyltransferase	LRH_02037	Glycosyltransferase related enzyme	HMPREF0539_2978	glycosyltransferase	LRHMDP2_1079	Glycosyltransferase	LRHMDP3_2438	Glycosyltransferase	LC705_00667	glycosyl transferase group 2	PEL5_585	Glycosyltransferase	PEL6_2213	Glycosyltransferase	R0011_09623	glycosyl transferase group 2
LGG_00696	4-amino-4-deoxy-L-arabinose transferase-like glycosyltransferase of PMT family protein	HMPREF0541_02251	dolichyl-phosphate-mannose-proteinmannosyltransferase	LRHK_689	hypothetical protein	LRHM_0673	putative glycosyltransferase	E800_2826	FIG00742064: hypothetical protein	LRH_02032	4-amino-4-deoxy-L-arabinose transferase related glycosyltransferase of PMT family protein	HMPREF0539_2979	glycosyltransferase	LRHMDP2_1080	FIG00742064: hypothetical protein	LRHMDP3_2437	FIG00742064: hypothetical protein	LC705_00668	4-amino-4-deoxy-L-arabinose transferase-like glycosyltransferase of PMT family protein	PEL5_586	FIG00742064: hypothetical protein	PEL6_2212	FIG00742064: hypothetical protein	R0011_09628	glycosyltransferase
LGG_00697	GtcA family membrane protein	HMPREF0541_02252	GtrA-like protein	LRHK_690	gtrA-like family protein	LRHM_0674	hypothetical protein	E800_2827	Conserved membrane protein, GtcA family	LRH_02027	Conserved membrane protein, GtcA family	HMPREF0539_2980	GtcA family conserved membrane protein	LRHMDP2_1081	Conserved membrane protein, GtcA family	LRHMDP3_2436	Conserved membrane protein, GtcA family	LC705_00669	GtcA family membrane protein	PEL5_587	Conserved membrane protein, GtcA family	PEL6_2211	Conserved membrane protein, GtcA family	R0011_09633	GtcA family membrane protein
LGG_00698	hypothetical protein	HMPREF0541_01038	hypothetical protein	LRHK_1583	hypothetical protein	LRHM_0675	hypothetical protein							LRHMDP2_1082	Malolactic regulator	LRHMDP3_2435	Malolactic regulator			PEL5_588	ATP-dependent nuclease, subunit B	PEL6_2210	ATP-dependent nuclease, subunit B
LGG_00699	hypothetical protein	HMPREF0541_02253	hypothetical protein			LRHM_0676	hypothetical protein													PEL5_589	Alpha-galactosidase	PEL6_2209	Alpha-galactosidase
LGG_00700	two-component response regulator	HMPREF0541_02254	putative response regulator ArlR	LRHK_693	transcriptional regulatory, C terminal family protein	LRHM_0677	two-component response regulator	E800_2829	Two component system response regulator CiaR	LRH_02022	DNA-binding response regulator, OmpR family (Rec-wHTH domains)			LRHMDP2_1083	Two component system response regulator CiaR	LRHMDP3_2434	Two component system response regulator CiaR	LC705_00672	two-component response regulator	PEL5_590	Two component system response regulator CiaR	PEL6_2208	Two component system response regulator CiaR	R0011_09638	two-component response regulator
LGG_00701	two component sensor transduction histidine kinase	HMPREF0541_02255	ATPase/histidine kinase/DNA gyrase B/HSP90 domain protein	LRHK_694	histidine kinase-, DNA gyrase B-, and HSP90-like ATPase family protein	LRHM_0678	two-component sensor kinase	E800_2830	FIG00745678: hypothetical protein	LRH_02017	Signal transduction histidine kinase	HMPREF0539_2982	possible histidine kinase	LRHMDP2_1084	FIG00745678: hypothetical protein	LRHMDP3_2433	FIG00745678: hypothetical protein	LC705_00673	two component sensor transduction histidine kinase	PEL5_591	FIG00745678: hypothetical protein	PEL6_2207	FIG00745678: hypothetical protein	R0011_09643	two component sensor transduction histidine kinase
LGG_00702	hypothetical protein	HMPREF0541_02256	hypothetical protein	LRHK_695	hypothetical protein	LRHM_0679	hypothetical protein	E800_2831	FIG00744595: hypothetical protein	LRH_02007	hypothetical protein	HMPREF0539_2983	conserved hypothetical protein	LRHMDP2_1085	FIG00744595: hypothetical protein	LRHMDP3_2432	FIG00744595: hypothetical protein	LC705_00674	hypothetical protein	PEL5_592	FIG00744595: hypothetical protein	PEL6_2206	FIG00744595: hypothetical protein	R0011_09648	hypothetical protein
LGG_00703	polyketide synthase expression regulator					LRHM_0680	putative transcriptional regulator													PEL5_593	Regulator of polyketide synthase expression	PEL6_2205	Regulator of polyketide synthase expression
LGG_00704	short-chain dehydrogenase/reductase SDR					LRHM_0681	short-chain alcohol dehydrogenase													PEL5_594	Short-chain dehydrogenase/reductase SDR	PEL6_2204	Short-chain dehydrogenase/reductase SDR
LGG_00705	acetoacetate decarboxylase					LRHM_0682	acetoacetate decarboxylase													PEL5_595	Acetoacetate decarboxylase	PEL6_2203	Acetoacetate decarboxylase
LGG_00706	nitroreductase	HMPREF0541_02257	nitroreductase family protein	LRHK_696	nitroreductase family protein	LRHM_0683	nitroreductase	E800_2832	NADH dehydrogenase	LRH_02002	Nitroreductase	HMPREF0539_2984	NAD(P)H nitroreductase	LRHMDP2_1086	NADH dehydrogenase	LRHMDP3_2431	NADH dehydrogenase	LC705_00675	nitroreductase	PEL5_596	NADH dehydrogenase	PEL6_2202	NADH dehydrogenase	R0011_09653	nitroreductase
LGG_00707	L-Lactate dehydrogenase	HMPREF0541_02258	dehydrogenase, FMN-dependent	LRHK_697	lactate oxidase	LRHM_0684	L-lactate dehydrogenase	E800_2833	Lactate 2-monooxygenase	LRH_01997	L-lactate dehydrogenase (FMN-dependent) related alpha-hydroxy acid dehydrogenase	HMPREF0539_2985	possible (S)-2-hydroxy-acid oxidase	LRHMDP2_1087	Lactate 2-monooxygenase	LRHMDP3_2430	Lactate 2-monooxygenase	LC705_00676	L-Lactate dehydrogenase	PEL5_597	Lactate 2-monooxygenase	PEL6_2201	Lactate 2-monooxygenase	R0011_09658	L-Lactate dehydrogenase
LGG_00708	hypothetical protein	HMPREF0541_02261	hypothetical protein	LRHK_703	hypothetical protein	LRHM_0685	hypothetical protein	E800_2834	FIG00751104: hypothetical protein	LRH_01992	hypothetical protein	HMPREF0539_2990	conserved hypothetical protein	LRHMDP2_1088	FIG00751104: hypothetical protein	LRHMDP3_2429	FIG00751104: hypothetical protein	LC705_00700	hypothetical protein	PEL5_598	FIG00751104: hypothetical protein	PEL6_2200	FIG00751104: hypothetical protein	R0011_09663	hypothetical protein
LGG_00709	PadR family transcriptional regulator	HMPREF0541_02262	transcriptional regulator, PadR family	LRHK_704	PadR family transcriptional regulator	LRHM_0686	transcriptional regulator	E800_1715	Transcriptional regulator, PadR family	LRH_01987	Predicted transcriptional regulator	HMPREF0539_2991	PadR family transcriptional regulator	LRHMDP2_1089	Transcriptional regulator, PadR family	LRHMDP3_2428	Transcriptional regulator, PadR family	LC705_00701	transcriptional regulator PadR family	PEL5_599	Transcriptional regulator, PadR family	PEL6_2199	Transcriptional regulator, PadR family	R0011_09668	transcriptional regulator PadR family protein
LGG_00710	membrane protein	HMPREF0541_02263	hypothetical protein	LRHK_705	mtN3/saliva family protein	LRHM_0687	hypothetical protein	E800_1716	Small conserved membrane protein	LRH_01982	Small conserved membrane protein	HMPREF0539_2992	small conserved membrane protein	LRHMDP2_1090	Small conserved membrane protein	LRHMDP3_2427	Small conserved membrane protein	LC705_00702	membrane protein	PEL5_600	Small conserved membrane protein	PEL6_2198	Small conserved membrane protein	R0011_09673	membrane protein
LGG_00711	hypothetical protein	HMPREF0541_02264	hypothetical protein	LRHK_706	hypothetical protein	LRHM_0688	hypothetical protein	E800_1717	FIG00745092: hypothetical protein	LRH_01977	hypothetical protein	HMPREF0539_2993	conserved hypothetical protein	LRHMDP2_1091	FIG00745092: hypothetical protein	LRHMDP3_2426	FIG00745092: hypothetical protein	LC705_00703	hypothetical protein	PEL5_601	FIG00745092: hypothetical protein	PEL6_2197	FIG00745092: hypothetical protein	R0011_09678	hypothetical protein
LGG_00712	alcohol dehydrogenase	HMPREF0541_02265	zinc-binding alcohol dehydrogenase family protein	LRHK_707	alcohol dehydrogenase GroES-like domain protein	LRHM_0689	zinc-binding oxidoreductase	E800_1718	Alcohol dehydrogenase	LRH_01972	NADPH:quinone reductase related Zn-dependent oxidoreductase	HMPREF0539_2994	NADPH:quinone reductase	LRHMDP2_1092	Alcohol dehydrogenase	LRHMDP3_2425	Alcohol dehydrogenase	LC705_00704	alcohol dehydrogenase	PEL5_602	Alcohol dehydrogenase	PEL6_2196	Alcohol dehydrogenase	R0011_09683	alcohol dehydrogenase
LGG_00713	hypothetical protein	HMPREF0541_02266	hypothetical protein	LRHK_708	hypothetical protein	LRHM_0690	hypothetical protein	E800_1719	FIG00745317: hypothetical protein	LRH_01967	hypothetical protein	HMPREF0539_2995	conserved hypothetical protein	LRHMDP2_1093	FIG00745317: hypothetical protein	LRHMDP3_2424	FIG00745317: hypothetical protein	LC705_00705	hypothetical protein	PEL5_603	FIG00745317: hypothetical protein	PEL6_2195	FIG00745317: hypothetical protein	R0011_09688	hypothetical protein
LGG_00714	hypothetical protein	HMPREF0541_02267	hypothetical protein	LRHK_709	hypothetical protein	LRHM_0691	hypothetical protein	E800_1720	FIG00749261: hypothetical protein	LRH_01962	hypothetical protein	HMPREF0539_2996	conserved hypothetical protein	LRHMDP2_1094	FIG00749261: hypothetical protein	LRHMDP3_2423	FIG00749261: hypothetical protein	LC705_00706	hypothetical protein	PEL5_604	FIG00749261: hypothetical protein	PEL6_2194	FIG00749261: hypothetical protein	R0011_09693	hypothetical protein
LGG_00715	membrane protein	HMPREF0541_02268	hypothetical protein	LRHK_710	hypothetical protein	LRHM_0692	putative transporter protein	E800_1721	FIG00749797: hypothetical protein	LRH_01957	Predicted permease	HMPREF0539_2997	permease	LRHMDP2_1095	FIG00749797: hypothetical protein	LRHMDP3_2422	FIG00749797: hypothetical protein	LC705_00707	membrane protein	PEL5_605	FIG00749797: hypothetical protein	PEL6_2193	FIG00749797: hypothetical protein	R0011_09698	membrane protein
LGG_00716	hypothetical protein	HMPREF0541_02269	hypothetical protein	LRHK_712	hypothetical protein	LRHM_0693	hypothetical protein	E800_1722	hypothetical protein	LRH_01952	hypothetical protein	HMPREF0539_2998	conserved hypothetical protein	LRHMDP2_1096	hypothetical protein	LRHMDP3_2421	hypothetical protein	LC705_00708	hypothetical protein	PEL5_606	hypothetical protein	PEL6_2192	hypothetical protein	R0011_09703	hypothetical protein
LGG_00717	LexA repressor	HMPREF0541_02270	repressor LexA	LRHK_713	repressor LexA	LRHM_0694	transcriptional repressor	E800_1724	SOS-response repressor and protease LexA	LRH_01947	Transcriptional regulator, xre family protein	HMPREF0539_3000	repressor lexA	LRHMDP2_1097	SOS-response repressor and protease LexA	LRHMDP3_2420	SOS-response repressor and protease LexA	LC705_00710	LexA repressor	PEL5_608	SOS-response repressor and protease LexA	PEL6_2190	SOS-response repressor and protease LexA	R0011_09708	LexA repressor
LGG_00718	hypothetical protein	HMPREF0541_02271	hypothetical protein	LRHK_714	hypothetical protein	LRHM_0695	hypothetical protein	E800_1725	FIG00742573: hypothetical protein	LRH_01937	hypothetical protein	HMPREF0539_3001	conserved hypothetical protein	LRHMDP2_1098	FIG00742573: hypothetical protein	LRHMDP3_2419	FIG00742573: hypothetical protein	LC705_00711	hypothetical protein	PEL5_609	FIG00742573: hypothetical protein	PEL6_2189	FIG00742573: hypothetical protein
LGG_00719	Auxin efflux carrier (AEC) family permease	HMPREF0541_02272	transporter, auxin efflux carrier family protein	LRHK_715	membrane transport family protein	LRHM_0696	putative transporter protein	E800_1726	Malate permease	LRH_01932	Auxin efflux carrier (AEC) family permease	HMPREF0539_3002	AEC family malonate efflux carrier	LRHMDP2_1099	Malate permease	LRHMDP3_2418	Malate permease	LC705_00712	auxin efflux carrier (AEC) family permease	PEL5_610	Malate permease	PEL6_2188	Malate permease	R0011_09723	auxin efflux carrier (AEC) family permease
LGG_00720	hypothetical protein	HMPREF0541_02273	hypothetical protein	LRHK_716	flavin reductase like domain protein	LRHM_0697	hypothetical protein	E800_1727	Nitrilotriacetate monooxygenase component B	LRH_01927	Conserved protein/domain typically associated with flavoprotein oxygenase, DIM6/NTAB family	HMPREF0539_3003	DIM6/NTAB family conserved protein/domain typically associated with flavoprotein oxygenase	LRHMDP2_1100	Nitrilotriacetate monooxygenase component B	LRHMDP3_2417	Nitrilotriacetate monooxygenase component B	LC705_00713	hypothetical protein	PEL5_611	Nitrilotriacetate monooxygenase component B	PEL6_2187	Nitrilotriacetate monooxygenase component B	R0011_09728	hypothetical protein
LGG_00721	hypothetical protein	HMPREF0541_02274	hypothetical protein	LRHK_717	hypothetical protein	LRHM_0698	hypothetical protein	E800_1728	FIG00747740: hypothetical protein	LRH_01922	hypothetical protein	HMPREF0539_3004	conserved hypothetical protein	LRHMDP2_1101	FIG00747740: hypothetical protein	LRHMDP3_2416	FIG00747740: hypothetical protein	LC705_00714	hypothetical protein	PEL5_612	FIG00747740: hypothetical protein	PEL6_2186	FIG00747740: hypothetical protein	R0011_09733	hypothetical protein
LGG_00722	5-formyltetrahydrofolate cyclo-ligase	HMPREF0541_02275	5-formyltetrahydrofolate cyclo-ligase	LRHK_718	5-formyltetrahydrofolate cyclo-ligase	LRHM_0699	5-formyltetrahydrofolate cyclo-ligase	E800_1729	5-formyltetrahydrofolate cyclo-ligase	LRH_01917	5-formyltetrahydrofolate cyclo-ligase	HMPREF0539_3005	5-formyltetrahydrofolate cyclo-ligase	LRHMDP2_1102	5-formyltetrahydrofolate cyclo-ligase	LRHMDP3_2415	5-formyltetrahydrofolate cyclo-ligase	LC705_00715	5-formyltetrahydrofolate cyclo-ligase	PEL5_613	5-formyltetrahydrofolate cyclo-ligase	PEL6_2185	5-formyltetrahydrofolate cyclo-ligase	R0011_09738	5-formyltetrahydrofolate cyclo-ligase
LGG_00723	hypothetical protein	HMPREF0541_02276	hypothetical protein	LRHK_719	hypothetical protein	LRHM_0700	hypothetical protein	E800_1730	FIG00745927: hypothetical protein	LRH_01912	hypothetical protein	HMPREF0539_3006	protein of hypothetical function DUF488	LRHMDP2_1103	FIG00745927: hypothetical protein	LRHMDP3_2414	FIG00745927: hypothetical protein	LC705_00716	hypothetical protein	PEL5_614	FIG00745927: hypothetical protein	PEL6_2184	FIG00745927: hypothetical protein	R0011_09743	hypothetical protein
LGG_00724	Mg2 and Co2 transporter	HMPREF0541_02277	CorA-like protein	LRHK_720	corA-like Mg2+ transporter family protein	LRHM_0701	Mg2+ and Co2+ transporter protein	E800_1731	Magnesium and cobalt transport protein CorA	LRH_01907	Mg2+ and Co2+ transporter	HMPREF0539_3007	MIT family metal ion transporter CorA	LRHMDP2_1104	Magnesium and cobalt transport protein CorA	LRHMDP3_2413	Magnesium and cobalt transport protein CorA	LC705_00717	Mg2 and Co2 transporter	PEL5_615	Magnesium and cobalt transport protein CorA	PEL6_2183	Magnesium and cobalt transport protein CorA	R0011_09748	metal ion transporter, MIT family
LGG_00725	LysR family transcriptional regulator			LRHK_721	bacterial regulatory helix-turn-helix, lysR family protein	LRHM_0702	malolactic fermentation system transcription activator	E800_1732	Malolactic regulator	LRH_01902	malolactic fermentation system transcription activator	HMPREF0539_3008	LysR family transcriptional regulator	LRHMDP2_1105	Malolactic regulator	LRHMDP3_2412	Malolactic regulator	LC705_00718	LysR family transcriptional regulator	PEL5_616	Malolactic regulator	PEL6_2182	Malolactic regulator	R0011_09753	LysR family malolactic regulator
LGG_00726	malate dehydrogenase	HMPREF0541_02280	putative NAD-dependent malic enzyme 3	LRHK_722	malic enzyme, NAD binding domain protein	LRHM_0704	malolactic protein	E800_1733	Malolactic enzyme	LRH_01897	malate dehydrogenase	HMPREF0539_3010	malate dehydrogenase (oxaloacetate-decarboxylating)	LRHMDP2_1107	Malolactic enzyme	LRHMDP3_2410	Malolactic enzyme	LC705_00719	malate dehydrogenase	PEL5_618	Malolactic enzyme	PEL6_2180	Malolactic enzyme	R0011_09758	malate dehydrogenase
LGG_00727	malate permease	HMPREF0541_02281	auxin efflux carrier	LRHK_723	membrane transport family protein	LRHM_0705	malate transporter protein	E800_1734	Malate permease	LRH_01892	Malate permease	HMPREF0539_3011	AEC family malonate efflux carrier	LRHMDP2_1108	Malate permease	LRHMDP3_2409	Malate permease	LC705_00720	malate permease	PEL5_619	Malate permease	PEL6_2179	Malate permease	R0011_09763	malate permease
LGG_00728	thiol peroxidase	HMPREF0541_02282	redoxin family protein	LRHK_724	ahpC/TSA family protein	LRHM_0706	thiol peroxidase	E800_1213	Thiol peroxidase, Tpx-type	LRH_00067	Peroxiredoxin	HMPREF0539_3012	thiol peroxidase	LRHMDP2_1109	Thiol peroxidase, Tpx-type	LRHMDP3_2408	Thiol peroxidase, Tpx-type	LC705_00721	thiol peroxidase	PEL5_1149	Thiol peroxidase, Tpx-type	PEL6_278	Thiol peroxidase, Tpx-type	R0011_09768	thiol peroxidase
LGG_00729	hypothetical protein	HMPREF0541_02284	hypothetical protein	LRHK_725	flavodoxin domain protein	LRHM_0707	hypothetical protein	E800_1214	FIG00744077: hypothetical protein	LRH_00072	hypothetical protein	HMPREF0539_3013	conserved hypothetical protein	LRHMDP2_1111	FIG00744077: hypothetical protein	LRHMDP3_2406	FIG00744077: hypothetical protein	LC705_00722	hypothetical protein	PEL5_1150	FIG00744077: hypothetical protein	PEL6_277	FIG00744077: hypothetical protein	R0011_09773	hypothetical protein
LGG_00730	transcriptional regulator	HMPREF0541_02285	DNA-binding helix-turn-helix protein	LRHK_726	transcriptional activator, Rgg/GadR/MutR family, C-terminal domain protein	LRHM_0708	hypothetical protein	E800_1215	UpsR	LRH_00077	transcription regulator	HMPREF0539_3014	transcription regulator	LRHMDP2_1112	UpsR	LRHMDP3_2405	UpsR	LC705_00723	transcriptional regulator	PEL5_1151	UpsR	PEL6_276	UpsR	R0011_09778	transcriptional regulator
LGG_00731	multidrug ABC transporter ATPase and permease	HMPREF0541_02286	ABC transporter, ATP-binding protein	LRHK_727	ABC transporter family protein	LRHM_0709	multidrug ABC transporter ATP-binding and permease components	E800_1216	FIG00743857: hypothetical protein	LRH_00082	ABC-type multidrug transport system, ATPase and permease component	HMPREF0539_3015	multidrug ABC superfamily ATP binding cassette transporter, ATPase and permease protein	LRHMDP2_1113	FIG00743857: hypothetical protein	LRHMDP3_2404	FIG00743857: hypothetical protein	LC705_00724	multidrug ABC transporter ATPase and permease	PEL5_1152	FIG00743857: hypothetical protein	PEL6_275	FIG00743857: hypothetical protein	R0011_09783	multidrug ABC transporter ATPase and permease
LGG_00732	oligoendopeptidase F	HMPREF0541_02287	oligoendopeptidase F	LRHK_728	oligoendopeptidase F	LRHM_0710	oligoendopeptidase F	E800_1217	Oligoendopeptidase F	LRH_00087	Oligoendopeptidase F	HMPREF0539_3016	M3 family oligoendopeptidase F	LRHMDP2_1114	Oligoendopeptidase F	LRHMDP3_2403	Oligoendopeptidase F	LC705_00725	oligoendopeptidase F	PEL5_1153	Oligoendopeptidase F	PEL6_274	Oligoendopeptidase F	R0011_09788	oligoendopeptidase F
LGG_00733	nucleoside diphosphate kinase	HMPREF0541_02288	nucleoside diphosphate kinase	LRHK_729	nucleoside diphosphate kinase B	LRHM_0711	nucleoside diphosphate kinase	E800_1218	Nucleoside diphosphate kinase	LRH_00092	Nucleoside diphosphate kinase	HMPREF0539_3017	nucleoside-diphosphate kinase	LRHMDP2_1115	Nucleoside diphosphate kinase	LRHMDP3_2402	Nucleoside diphosphate kinase	LC705_00726	nucleoside diphosphate kinase	PEL5_1154	Nucleoside diphosphate kinase	PEL6_273	Nucleoside diphosphate kinase	R0011_09793	nucleoside diphosphate kinase
LGG_00734	hypothetical protein	HMPREF0541_02289	hypothetical protein	LRHK_730	hypothetical protein	LRHM_0712	hypothetical protein	E800_1219	FIG00747967: hypothetical protein	LRH_00097	hypothetical protein	HMPREF0539_3018	conserved hypothetical protein	LRHMDP2_1116	FIG00747967: hypothetical protein	LRHMDP3_2401	FIG00747967: hypothetical protein	LC705_00727	hypothetical protein	PEL5_1155	FIG00747967: hypothetical protein	PEL6_272	FIG00747967: hypothetical protein	R0011_09798	hypothetical protein
LGG_00735	cation-transporting ATPase	HMPREF0541_02290	e1-E2 ATPase	LRHK_731	HAD ATPase, P-type, IC family protein	LRHM_0713	cation-transporting ATPase	E800_1220	Cation-transporting ATPase	LRH_00102	Cation transport ATPase	HMPREF0539_3019	P-ATPase superfamily cation transporter	LRHMDP2_1117	Cation-transporting ATPase	LRHMDP3_2400	Cation-transporting ATPase	LC705_00728	cation-transporting ATPase	PEL5_1156	Cation-transporting ATPase	PEL6_271	Cation-transporting ATPase	R0011_09803	cation-transporting ATPase
LGG_00736	prolyl aminopeptidase	HMPREF0541_02291	proline-specific peptidase	LRHK_732	proline-specific peptidases family protein	LRHM_0714	prolyl aminopeptidase	E800_1221	Proline iminopeptidase	LRH_00107	prolyl aminopeptidase	HMPREF0539_3020	possible prolyl aminopeptidase	LRHMDP2_1118	Proline iminopeptidase	LRHMDP3_2399	Proline iminopeptidase	LC705_00729	prolyl aminopeptidase	PEL5_1157	Proline iminopeptidase	PEL6_270	Proline iminopeptidase	R0011_09808	prolyl aminopeptidase
LGG_00737	hypothetical protein	HMPREF0541_02292	hypothetical protein	LRHK_733	hypothetical protein	LRHM_0715	hypothetical protein	E800_1222	FIG00747494: hypothetical protein	LRH_00112	hypothetical protein	HMPREF0539_3021	conserved hypothetical protein	LRHMDP2_1119	FIG00747494: hypothetical protein	LRHMDP3_2398	FIG00747494: hypothetical protein	LC705_00730	hypothetical protein	PEL5_1158	FIG00747494: hypothetical protein	PEL6_269	FIG00747494: hypothetical protein	R0011_09813	hypothetical protein
LGG_00738	acetyltransferase	HMPREF0541_02293	acetyltransferase, GNAT family	LRHK_734	GNAT family acetyltransferase	LRHM_0716	acetyltransferase	E800_1224	Histone acetyltransferase HPA2 and related acetyltransferases	LRH_00117	Acetyltransferase, GNAT family protein	HMPREF0539_3022	GNAT family acetyltransferase	LRHMDP2_1120	Histone acetyltransferase HPA2 and related acetyltransferases	LRHMDP3_2397	Histone acetyltransferase HPA2 and related acetyltransferases	LC705_00731	acetyltransferase	PEL5_1160	Histone acetyltransferase HPA2 and related acetyltransferases	PEL6_267	Histone acetyltransferase HPA2 and related acetyltransferases	R0011_09818	acetyltransferase
LGG_00739	Na/H antiporter	HMPREF0541_02294	Na+/H+ antiporter	LRHK_735	proton antiporter-2 family protein	LRHM_0717	Na+/H+ antiporter	E800_1225	Na(+)/H(+) antiporter	LRH_00122	Kef-type K+ transport system, membrane component	HMPREF0539_3023	CPA2 family monovalent cation:proton (H+) antiporter-2	LRHMDP2_1121	Na(+)/H(+) antiporter	LRHMDP3_2396	Na(+)/H(+) antiporter	LC705_00732	Na/H antiporter	PEL5_1161	Na(+)/H(+) antiporter	PEL6_266	Na(+)/H(+) antiporter	R0011_09823	Na/H antiporter
LGG_00740	haloacid dehalogenase-like family hydrolase	HMPREF0541_02295	haloacid dehalogenase-like hydrolase	LRHK_736	haloacid dehalogenase-like hydrolase family protein	LRHM_0718	putative phosphatase	E800_1226	Phosphoglycolate phosphatase	LRH_00127	Predicted phosphatase	HMPREF0539_3024	possible 5'-nucleotidase	LRHMDP2_1122	Phosphoglycolate phosphatase	LRHMDP3_2395	Phosphoglycolate phosphatase	LC705_00734	haloacid dehalogenase-like family hydrolase	PEL5_1162	Phosphoglycolate phosphatase	PEL6_265	Phosphoglycolate phosphatase	R0011_09828	haloacid dehalogenase-like family hydrolase
LGG_00741	MarR family transcriptional regulator	HMPREF0541_02296	transcriptional regulator, MarR family	LRHK_737	marR family protein	LRHM_0719	transcriptional regulator	E800_1227	Transcriptional regulator, MarR family	LRH_00132	Transcriptional regulator	HMPREF0539_3025	transcriptional regulator	LRHMDP2_1123	Transcriptional regulator, MarR family	LRHMDP3_2394	Transcriptional regulator, MarR family	LC705_00735	MarR family transcriptional regulator	PEL5_1163	Transcriptional regulator, MarR family	PEL6_264	Transcriptional regulator, MarR family	R0011_09833	MarR family transcriptional regulator
LGG_00742	alpha/beta hydrolase	HMPREF0541_02297	hypothetical protein	LRHK_738	prolyl oligopeptidase family protein	LRHM_0720	putative cell surface hydrolase	E800_1228	Hydrolases of the alpha/beta superfamily	LRH_00137	hydrolase of the alpha/beta superfamily protein	HMPREF0539_3026	family S9 peptidase	LRHMDP2_1124	Hydrolases of the alpha/beta superfamily	LRHMDP3_2393	Hydrolases of the alpha/beta superfamily	LC705_00736	alpha/beta hydrolase	PEL5_1164	Hydrolases of the alpha/beta superfamily	PEL6_263	Hydrolases of the alpha/beta superfamily	R0011_09838	alpha/beta hydrolase
LGG_00743	flavoprotein NrdI	HMPREF0541_02298	putative nrdI protein	LRHK_739	nrdI Flavodoxin like family protein	LRHM_0721	putative ribonucleotide reductase	E800_1229	Ribonucleotide reduction protein NrdI	LRH_00142	Ribonucleotide reduction protein	HMPREF0539_3027	ribonucleotide reduction protein	LRHMDP2_1125	Ribonucleotide reduction protein NrdI	LRHMDP3_2392	Ribonucleotide reduction protein NrdI	LC705_00737	flavoprotein NrdI	PEL5_1165	Ribonucleotide reduction protein NrdI	PEL6_262	Ribonucleotide reduction protein NrdI	R0011_09843	flavoprotein NrdI
LGG_00744	aldo/keto reductase	HMPREF0541_02299	2,5-diketo-D-gluconic acid reductase B	LRHK_740	2, 5-diketo-D-gluconic acid reductase B	LRHM_0722	2,5-diketo-D-gluconate reductase	E800_1230	oxidoreductase of aldo/keto reductase family, subgroup 1	LRH_00147	Aldo/keto reductase related enzyme	HMPREF0539_3028	2,5-didehydrogluconate reductase	LRHMDP2_1126	oxidoreductase of aldo/keto reductase family, subgroup 1	LRHMDP3_2391	oxidoreductase of aldo/keto reductase family, subgroup 1	LC705_00738	aldo/keto reductase	PEL5_1166	oxidoreductase of aldo/keto reductase family, subgroup 1	PEL6_261	oxidoreductase of aldo/keto reductase family, subgroup 1	R0011_09848	aldo/keto reductase
LGG_00745	hypothetical protein	HMPREF0541_02300	hypothetical protein	LRHK_741	hypothetical protein	LRHM_0723	hypothetical protein	E800_1231	FIG00742692: hypothetical protein	LRH_00152	hypothetical protein	HMPREF0539_3029	conserved hypothetical protein	LRHMDP2_1127	FIG00742692: hypothetical protein	LRHMDP3_2390	FIG00742692: hypothetical protein	LC705_00739	hypothetical protein	PEL5_1167	FIG00742692: hypothetical protein	PEL6_260	FIG00742692: hypothetical protein	R0011_09853	hypothetical protein
LGG_00746	alpha/beta hydrolase superfamily protein	HMPREF0541_02301	hypothetical protein	LRHK_742	cholesterol acyltransferase family protein	LRHM_0724	hypothetical protein	E800_1232	cell surface hydrolase (putative)	LRH_00157	alpha/beta hydrolase superfamily protein	HMPREF0539_3030	alpha/beta hydrolase superfamily protein	LRHMDP2_1128	cell surface hydrolase (putative)	LRHMDP3_2389	cell surface hydrolase (putative)	LC705_00740	alpha/beta hydrolase superfamily protein	PEL5_1168	cell surface hydrolase (putative)	PEL6_259	cell surface hydrolase (putative)	R0011_09858	alpha/beta hydrolase superfamily protein
LGG_00747	membrane protein	HMPREF0541_02302	hypothetical protein	LRHK_743	hypothetical protein	LRHM_0725	hypothetical protein	E800_1233	probable membrane protein yetF	LRH_00162	Predicted membrane protein	HMPREF0539_3031	membrane protein	LRHMDP2_1129	probable membrane protein yetF	LRHMDP3_2388	probable membrane protein yetF	LC705_00741	membrane protein	PEL5_1169	probable membrane protein yetF	PEL6_258	probable membrane protein yetF	R0011_09863	membrane protein
LGG_00748	hypothetical protein	HMPREF0541_02303	hypothetical protein	LRHK_744	hypothetical protein	LRHM_0726	hypothetical protein	E800_1234	FIG00746543: hypothetical protein	LRH_00167	hypothetical protein	HMPREF0539_3032	conserved hypothetical protein	LRHMDP2_1130	FIG00746543: hypothetical protein	LRHMDP3_2387	FIG00746543: hypothetical protein	LC705_00742	hypothetical protein	PEL5_1170	FIG00746543: hypothetical protein	PEL6_257	FIG00746543: hypothetical protein	R0011_09868	hypothetical protein
LGG_00749	hypothetical protein	HMPREF0541_02305	methionine synthase, vitamin-B12 independent	LRHK_745	cobalamin-independent synthase, Catalytic domain protein	LRHM_0727	hypothetical protein	E800_1236	contains methionine synthase, vitamin-B12 independent domain	LRH_00172	hypothetical protein	HMPREF0539_3034	5-methyltetrahydropteroyltriglutamate-- homocysteine S-methyltransferase	LRHMDP2_1132	contains methionine synthase, vitamin-B12 independent domain	LRHMDP3_2385	contains methionine synthase, vitamin-B12 independent domain	LC705_00743	hypothetical protein	PEL5_1171	contains methionine synthase, vitamin-B12 independent domain	PEL6_256	contains methionine synthase, vitamin-B12 independent domain	R0011_09873	hypothetical protein
LGG_00750	S-ribosylhomocysteinase	HMPREF0541_02306	S-ribosylhomocysteinase LuxS	LRHK_746	S-ribosylhomocysteinase	LRHM_0728	S-ribosylhomocysteinase	E800_1237	S-ribosylhomocysteine lyase / Autoinducer-2 production protein LuxS	LRH_00177	S-ribosylhomocysteinase	HMPREF0539_3035	S-ribosylhomocysteinase	LRHMDP2_1133	S-ribosylhomocysteine lyase / Autoinducer-2 production protein LuxS	LRHMDP3_2384	S-ribosylhomocysteine lyase / Autoinducer-2 production protein LuxS	LC705_00744	S-ribosylhomocysteinase	PEL5_1172	S-ribosylhomocysteine lyase / Autoinducer-2 production protein LuxS	PEL6_255	S-ribosylhomocysteine lyase / Autoinducer-2 production protein LuxS	R0011_09878	S-ribosylhomocysteinase
LGG_00751	hypothetical protein	HMPREF0541_02307	SNARE-like domain protein	LRHK_747	hypothetical protein	LRHM_0729	hypothetical protein	E800_1238	Immunoreactive protein Se23.5 (Fragment)	LRH_00182	hypothetical protein	HMPREF0539_3036	integral membrane protein	LRHMDP2_1134	Immunoreactive protein Se23.5 (Fragment)	LRHMDP3_2383	Immunoreactive protein Se23.5 (Fragment)	LC705_00745	hypothetical protein	PEL5_1173	Immunoreactive protein Se23.5 (Fragment)	PEL6_254	Immunoreactive protein Se23.5 (Fragment)	R0011_09883	snare associated golgi family protein
LGG_00752	Holliday junction DNA helicase RuvA	HMPREF0541_02308	Holliday junction DNA helicase RuvA	LRHK_748	Holliday junction ATP-dependent DNA helicase RuvA	LRHM_0730	Holliday junction ATP-dependent DNA helicase RuvA	E800_1239	Holliday junction DNA helicase RuvA	LRH_00187	Holliday junction resolvasome, DNA-binding subunit	HMPREF0539_3037	crossover junction endoribonuclease subunit A	LRHMDP2_1135	Holliday junction DNA helicase RuvA	LRHMDP3_2382	Holliday junction DNA helicase RuvA	LC705_00746	Holliday junction DNA helicase RuvA	PEL5_1174	Holliday junction DNA helicase RuvA	PEL6_253	Holliday junction DNA helicase RuvA	R0011_09888	Holliday junction DNA helicase RuvA
LGG_00753	Holliday junction DNA helicase RuvB	HMPREF0541_02309	Holliday junction DNA helicase RuvB	LRHK_749	Holliday junction ATP-dependent DNA helicase RuvB	LRHM_0731	Holliday junction ATP-dependent DNA helicase RuvB	E800_1240	Holliday junction DNA helicase RuvB	LRH_00192	Holliday junction DNA helicase B	HMPREF0539_3038	crossover junction endoribonuclease subunit B	LRHMDP2_1136	Holliday junction DNA helicase RuvB	LRHMDP3_2381	Holliday junction DNA helicase RuvB	LC705_00747	Holliday junction DNA helicase RuvB	PEL5_1175	Holliday junction DNA helicase RuvB	PEL6_252	Holliday junction DNA helicase RuvB	R0011_09893	Holliday junction DNA helicase RuvB
LGG_00754	S-adenosylmethionine:tRNA ribosyltransferase-isomerase	HMPREF0541_02310	S-adenosylmethionine:tRNA ribosyltransferase-isomerase	LRHK_750	tRNA ribosyltransferase-isomerase	LRHM_0732	S-adenosylmethionine:tRNA-ribosyltransferase- isomerase	E800_1241	S-adenosylmethionine:tRNA ribosyltransferase-isomerase	LRH_00197	S-adenosylmethionine:tRNA-ribosyltransferase- isomerase (queuine synthetase)	HMPREF0539_3039	S-adenosylmethionine:tRNA ribosyltransferase-isomerase QueA	LRHMDP2_1137	S-adenosylmethionine:tRNA ribosyltransferase-isomerase	LRHMDP3_2380	S-adenosylmethionine:tRNA ribosyltransferase-isomerase	LC705_00748	S-adenosylmethionine:tRNA ribosyltransferase-isomerase	PEL5_1176	S-adenosylmethionine:tRNA ribosyltransferase-isomerase	PEL6_251	S-adenosylmethionine:tRNA ribosyltransferase-isomerase	R0011_09898	S-adenosylmethionine:tRNA ribosyltransferase-isomerase
LGG_00755	Queuine tRNA-ribosyltransferase	HMPREF0541_02311	tRNA-guanine transglycosylase	LRHK_751	queuine tRNA-ribosyltransferase	LRHM_0733	queuine tRNA-ribosyltransferase	E800_1242	tRNA-guanine transglycosylase	LRH_00202	Queuine/archaeosine tRNA-ribosyltransferase	HMPREF0539_3040	tRNA-guanine transglycosylase	LRHMDP2_1138	tRNA-guanine transglycosylase	LRHMDP3_1729	tRNA-guanine transglycosylase	LC705_00749	Queuine tRNA-ribosyltransferase	PEL5_1178	tRNA-guanine transglycosylase	PEL6_250	tRNA-guanine transglycosylase	R0011_09903	queuine tRNA-ribosyltransferase
LGG_00756	preprotein translocase YajC	HMPREF0541_02312	preprotein translocase, YajC subunit	LRHK_752	preprotein translocase subunit YajC	LRHM_0734	preprotein translocase subunit YajC	E800_1243	Preprotein translocase subunit YajC (TC 3.A.5.1.1)	LRH_00207	Preprotein translocase subunit YajC	HMPREF0539_3041	preprotein translocase subunit YajC	LRHMDP2_1139	Preprotein translocase subunit YajC (TC 3.A.5.1.1)	LRHMDP3_1728	Preprotein translocase subunit YajC (TC 3.A.5.1.1)	LC705_00750	preprotein translocase YajC	PEL5_1179	Preprotein translocase subunit YajC (TC 3.A.5.1.1)	PEL6_249	Preprotein translocase subunit YajC (TC 3.A.5.1.1)	R0011_09908	preprotein translocase subunit YajC
LGG_00757	bifunctional acetaldehyde-CoA/alcohol dehydrogenase	HMPREF0541_02313	aldehyde-alcohol dehydrogenase 2	LRHK_753	3-dehydroquinate synthase	LRHM_0735	aldehyde-alcohol dehydrogenase	E800_1244	Alcohol dehydrogenase; Acetaldehyde dehydrogenase	LRH_00212	NAD-dependent alcohol-acetaldehyde dehydrogenase and iron-binding alcohol dehydrogenase	HMPREF0539_3043	possible acetaldehyde dehydrogenase (acetylating)	LRHMDP2_1140	Alcohol dehydrogenase; Acetaldehyde dehydrogenase	LRHMDP3_1727	Alcohol dehydrogenase; Acetaldehyde dehydrogenase	LC705_00751	bifunctional acetaldehyde-CoA/alcohol dehydrogenase	PEL5_1180	Alcohol dehydrogenase; Acetaldehyde dehydrogenase	PEL6_248	Alcohol dehydrogenase; Acetaldehyde dehydrogenase	R0011_09913	bifunctional acetaldehyde-CoA/alcohol dehydrogenase
LGG_00758	hypothetical protein	HMPREF0541_02314	hypothetical protein	LRHK_754	hypothetical protein			E800_1245	FIG00745434: hypothetical protein			HMPREF0539_3044	hypothetical protein					LC705_00752	hypothetical protein
LGG_00759	iron-dependent transcriptional regulator FeoA family	HMPREF0541_02315	iron dependent repressor, DNA binding domain protein	LRHK_755	iron dependent repressor, N-terminal DNA binding domain protein	LRHM_0736	transcriptional regulator	E800_1246	Mn-dependent transcriptional regulator MntR	LRH_00217	Mn-dependent transcriptional regulator	HMPREF0539_3045	metal-dependent transcriptional regulator	LRHMDP2_1141	Mn-dependent transcriptional regulator MntR	LRHMDP3_1726	Mn-dependent transcriptional regulator MntR	LC705_00753	FeoA family iron-dependent transcriptional regulator	PEL5_1181	Mn-dependent transcriptional regulator MntR	PEL6_247	Mn-dependent transcriptional regulator MntR	R0011_09918	FeoA family iron-dependent transcriptional regulator
LGG_00760	glucose-6-phosphate 1-dehydrogenase	HMPREF0541_02316	glucose-6-phosphate dehydrogenase	LRHK_756	glucose-6-phosphate dehydrogenase	LRHM_0737	glucose-6-phosphate 1-dehydrogenase	E800_1247	Glucose-6-phosphate 1-dehydrogenase	LRH_00222	Glucose-6-phosphate 1-dehydrogenase	HMPREF0539_3046	glucose-6-phosphate dehydrogenase	LRHMDP2_1142	Glucose-6-phosphate 1-dehydrogenase	LRHMDP3_1725	Glucose-6-phosphate 1-dehydrogenase	LC705_00754	glucose-6-phosphate 1-dehydrogenase	PEL5_1182	Glucose-6-phosphate 1-dehydrogenase	PEL6_246	Glucose-6-phosphate 1-dehydrogenase	R0011_09923	glucose-6-phosphate 1-dehydrogenase
LGG_00761	DNA polymerase IV	HMPREF0541_02317	ImpB/MucB/SamB family protein	LRHK_758	DNA polymerase IV	LRHM_0738	DNA-damage-inducible protein P	E800_1248	DNA polymerase IV	LRH_00227	Nucleotidyltransferase/DNA polymerase for DNA repair	HMPREF0539_3155	DNA-directed DNA polymerase	LRHMDP2_1143	DNA polymerase IV	LRHMDP3_1724	DNA polymerase IV	LC705_00755	DNA polymerase IV	PEL5_1183	DNA polymerase IV	PEL6_245	DNA polymerase IV	R0011_09928	DNA polymerase IV
LGG_00762	thioesterase family protein	HMPREF0541_02318	DRTGG domain protein	LRHK_760	thioesterase superfamily protein	LRHM_0739	transcriptional regulator	E800_1250	FIG009439: Cytosolic protein containing multiple CBS domains	LRH_00232	Transcriptional regulator with CBS domains	HMPREF0539_3047	CBS domain transcriptional regulator	LRHMDP2_1145	FIG009439: Cytosolic protein containing multiple CBS domains	LRHMDP3_1722	FIG009439: Cytosolic protein containing multiple CBS domains	LC705_00756	thioesterase family protein	PEL5_1185	FIG009439: Cytosolic protein containing multiple CBS domains	PEL6_243	FIG009439: Cytosolic protein containing multiple CBS domains	R0011_09933	thioesterase family protein
LGG_00763	phosphoesterase, DHH family protein	HMPREF0541_02319	DHHA1 domain protein	LRHK_761	DHH family protein	LRHM_0740	phosphoesterase	E800_1251	FIG146085: 3'-to-5' oligoribonuclease A, Bacillus type	LRH_00237	Phosphoesterase, DHH family protein	HMPREF0539_3048	phosphoesterase	LRHMDP2_1146	FIG146085: 3'-to-5' oligoribonuclease A, Bacillus type	LRHMDP3_1721	FIG146085: 3'-to-5' oligoribonuclease A, Bacillus type	LC705_00757	phosphoesterase, DHH family protein	PEL5_1186	FIG146085: 3'-to-5' oligoribonuclease A, Bacillus type	PEL6_242	FIG146085: 3'-to-5' oligoribonuclease A, Bacillus type	R0011_09938	phosphoesterase, DHH family protein
LGG_00764	ATP-dependent RNA helicase	HMPREF0541_02320	DEAD-box ATP-dependent RNA helicase CshB	LRHK_762	DEAD/DEAH box helicase	LRHM_0741	ATP-dependent DNA and RNA helicase	E800_1252	ATP-dependent RNA helicase YqfR	LRH_00242	Superfamily II DNA and RNA helicase	HMPREF0539_3049	ATP-dependent RNA helicase	LRHMDP2_1147	ATP-dependent RNA helicase YqfR	LRHMDP3_1720	ATP-dependent RNA helicase YqfR	LC705_00758	ATP-dependent RNA helicase	PEL5_1187	ATP-dependent RNA helicase YqfR	PEL6_241	ATP-dependent RNA helicase YqfR	R0011_09943	ATP-dependent RNA helicase
LGG_00765	hypothetical protein	HMPREF0541_02321	hypothetical protein	LRHK_763	hypothetical protein	LRHM_0742	hypothetical protein	E800_1253	FIG00742591: hypothetical protein	LRH_00247	hypothetical protein	HMPREF0539_3050	conserved hypothetical protein	LRHMDP2_1148	FIG00742591: hypothetical protein	LRHMDP3_1719	FIG00742591: hypothetical protein	LC705_00759	hypothetical protein	PEL5_1188	FIG00742591: hypothetical protein	PEL6_240	FIG00742591: hypothetical protein	R0011_09948	hypothetical protein
LGG_00766	hypothetical protein			LRHK_764	hypothetical protein	LRHM_0743	hypothetical protein	E800_1254	ATP-dependent nuclease, subunit B	LRH_00252	hypothetical protein							LC705_00760	hypothetical protein	PEL5_1189	ATP-dependent nuclease, subunit B	PEL6_239	ATP-dependent nuclease, subunit B
LGG_00767	alanyl-tRNA synthetase	HMPREF0541_02324	alanine--tRNA ligase	LRHK_765	alanine--tRNA ligase	LRHM_0744	alanyl-tRNA synthetase	E800_1255	Alanyl-tRNA synthetase	LRH_00257	Alanyl-tRNA synthetase	HMPREF0539_3054	possible alanine--tRNA ligase	LRHMDP2_2207	Alanyl-tRNA synthetase	LRHMDP3_1716	Alanyl-tRNA synthetase	LC705_00761	alanyl-tRNA synthetase	PEL5_1190	Alanyl-tRNA synthetase	PEL6_238	Alanyl-tRNA synthetase	R0011_09953	alanyl-tRNA synthetase
LGG_00768	hypothetical protein	HMPREF0541_02325	hypothetical protein	LRHK_766	hypothetical protein	LRHM_0745	hypothetical protein	E800_1256	FIG00750561: hypothetical protein	LRH_00262	hypothetical protein	HMPREF0539_3055	conserved hypothetical protein	LRHMDP2_2208	FIG00750561: hypothetical protein	LRHMDP3_1715	FIG00750561: hypothetical protein	LC705_00763	hypothetical protein	PEL5_1191	FIG00750561: hypothetical protein	PEL6_237	FIG00750561: hypothetical protein	R0011_09958	hypothetical protein
LGG_00769	hypothetical protein	HMPREF0541_02326	hypothetical protein	LRHK_767	hypothetical protein	LRHM_0746	hypothetical protein	E800_1257	Hypothetical protein possible functionally linked with Alanyl-tRNA synthetase	LRH_00267	hypothetical protein	HMPREF0539_3056	protein of hypothetical function DUF965	LRHMDP2_2209	Hypothetical protein possible functionally linked with Alanyl-tRNA synthetase	LRHMDP3_1714	Hypothetical protein possible functionally linked with Alanyl-tRNA synthetase	LC705_00764	hypothetical protein	PEL5_1192	Hypothetical protein possible functionally linked with Alanyl-tRNA synthetase	PEL6_236	Hypothetical protein possible functionally linked with Alanyl-tRNA synthetase	R0011_09963	hypothetical protein
LGG_00770	Holliday junction resolvase-like protein	HMPREF0541_02327	RNAse H domain protein, YqgF family	LRHK_768	hypothetical protein	LRHM_0747	holliday junction resolvase-like protein	E800_1258	Putative Holliday junction resolvase	LRH_00272	Holliday junction resolvase-like protein	HMPREF0539_3057	crossover junction endodeoxyribonuclease	LRHMDP2_2210	Putative Holliday junction resolvase	LRHMDP3_1713	Putative Holliday junction resolvase	LC705_00765	Holliday junction resolvase-like protein	PEL5_1193	Putative Holliday junction resolvase	PEL6_235	Putative Holliday junction resolvase	R0011_09968	Holliday junction resolvase-like protein
LGG_00771	hypothetical protein	HMPREF0541_02328	hypothetical protein	LRHK_769	hypothetical protein	LRHM_0748	hypothetical protein	E800_1259	Ortholog of S. aureus MRSA252 (BX571856) SAR1694	LRH_00277	hypothetical protein	HMPREF0539_3058	UPF0473 protein yrzB	LRHMDP2_2211	Ortholog of S. aureus MRSA252 (BX571856) SAR1694	LRHMDP3_1712	Ortholog of S. aureus MRSA252 (BX571856) SAR1694	LC705_00766	hypothetical protein	PEL5_1194	Ortholog of S. aureus MRSA252 (BX571856) SAR1694	PEL6_234	Ortholog of S. aureus MRSA252 (BX571856) SAR1694	R0011_09973	hypothetical protein
LGG_00772	stimulator of FtsZ polymerization and component of cell-division Z-ring	HMPREF0541_02330	hypothetical protein	LRHK_771	cell division ZapA family protein	LRHM_0749	hypothetical protein	E800_1261	conserved domain protein	LRH_00282	Stimulator of FtsZ polymerization and component of cell-division Z-ring	HMPREF0539_3060	Stimulator of FtsZ polymerization and component of cell-division Z-ring	LRHMDP2_2213	conserved domain protein	LRHMDP3_1710	conserved domain protein	LC705_00767	stimulator of FtsZ polymerization and component of cell-division Z-ring	PEL5_1195	conserved domain protein	PEL6_233	conserved domain protein	R0011_09978	stimulator of FtsZ polymerization and component of cell-division Z-ring
LGG_00773	colicin V production protein	HMPREF0541_02331	CvpA family protein	LRHK_772	colicin V production family protein	LRHM_0750	putative colicin V production protein	E800_1262	Colicin V production protein	LRH_00287	Predicted membrane ancor connecting MutS2 with cell-division Z-ring	HMPREF0539_3061	colicin V production protein	LRHMDP2_2214	Colicin V production protein	LRHMDP3_1709	Colicin V production protein	LC705_00768	Colicin V production protein	PEL5_1196	Colicin V production protein	PEL6_232	Colicin V production protein	R0011_09983	Colicin V production protein
LGG_00774	DNA mismatch repair protein mutS	HMPREF0541_02332	MutS2 family protein	LRHK_773	mutS2 family protein	LRHM_0751	ATPase	E800_1263	Recombination inhibitory protein MutS2	LRH_00292	MutS family ATPase	HMPREF0539_3062	MutS family DNA mismatch repair protein	LRHMDP2_2215	Recombination inhibitory protein MutS2	LRHMDP3_1708	Recombination inhibitory protein MutS2	LC705_00769	DNA mismatch repair protein mutS	PEL5_1197	Recombination inhibitory protein MutS2	PEL6_231	Recombination inhibitory protein MutS2	R0011_09988	DNA mismatch repair protein mutS
LGG_00775	thioredoxin	HMPREF0541_02333	thioredoxin	LRHK_774	thioredoxin	LRHM_0752	thioredoxin	E800_1264	Thioredoxin	LRH_00297	Thiol-disulfide isomerase and thioredoxin	HMPREF0539_3063	thioredoxin	LRHMDP2_2216	Thioredoxin	LRHMDP3_1707	Thioredoxin	LC705_00770	thioredoxin	PEL5_1198	Thioredoxin	PEL6_230	Thioredoxin	R0011_09993	thioredoxin
LGG_00776	D-Ala-teichoic acid biosynthesis protein	HMPREF0541_02335	hypothetical protein	LRHK_775	D-Ala-teichoic acid biosynthesis family protein	LRHM_0753	putative D-Ala-teichoic acid biosynthesis protein	E800_1265	D-Ala-teichoic acid biosynthesis protein (putative)	LRH_00302	D-Ala-teichoic acid biosynthesis protein (putative)	HMPREF0539_3064	D-Ala-teichoic acid biosynthesis protein	LRHMDP2_2217	D-Ala-teichoic acid biosynthesis protein (putative)	LRHMDP3_1706	D-Ala-teichoic acid biosynthesis protein (putative)	LC705_00771	D-Ala-teichoic acid biosynthesis protein	PEL5_1199	D-Ala-teichoic acid biosynthesis protein (putative)	PEL6_229	D-Ala-teichoic acid biosynthesis protein (putative)	R0011_09998	D-Ala-teichoic acid biosynthesis protein
LGG_00777	D-alanine--poly(phosphoribitol) ligase subunit 1	HMPREF0541_02336	D-alanine--poly(phosphoribitol) ligase, subunit 1	LRHK_776	D-alanine--poly(phosphoribitol) ligase, subunit 1	LRHM_0754	D-alanine--D-alanyl carrier protein ligase DltA	E800_1266	D-alanine--poly(phosphoribitol) ligase subunit 1	LRH_00307	D-alanine-activating enzyme	HMPREF0539_3065	D-alanine--poly(phosphoribitol) ligase subunit 1	LRHMDP2_2218	D-alanine--poly(phosphoribitol) ligase subunit 1	LRHMDP3_1705	D-alanine--poly(phosphoribitol) ligase subunit 1	LC705_00772	D-alanine--poly(phosphoribitol) ligase subunit 1	PEL5_1200	D-alanine--poly(phosphoribitol) ligase subunit 1	PEL6_228	D-alanine--poly(phosphoribitol) ligase subunit 1	R0011_10003	D-alanine--poly(phosphoribitol) ligase subunit 1
LGG_00778	D-alanyl transfer protein DltB	HMPREF0541_02337	putative protein DltB	LRHK_777	D-alanyl-lipoteichoic acid biosynthesis protein DltB	LRHM_0755	D-alanyl transfer protein DltB	E800_1267	D-alanyl transfer protein DltB	LRH_00312	D-alanyl transfer protein	HMPREF0539_3066	D-alanine transfer protein DltB	LRHMDP2_2219	D-alanyl transfer protein DltB	LRHMDP3_1704	D-alanyl transfer protein DltB	LC705_00773	D-alanyl transfer protein DltB	PEL5_1201	D-alanyl transfer protein DltB	PEL6_227	D-alanyl transfer protein DltB	R0011_10008	D-alanyl transfer protein DltB
LGG_00779	D-alanine--poly(phosphoribitol) ligase subunit 2	HMPREF0541_02338	D-alanine--poly(phosphoribitol) ligase, subunit 2	LRHK_778	D-alanine--poly(phosphoribitol) ligase, subunit 2	LRHM_0756	D-alanine--poly(phosphoribitol) ligase DltC	E800_1268	D-alanine--poly(phosphoribitol) ligase subunit 2	LRH_00317	D-alanyl carrier protein	HMPREF0539_3067	D-alanine--poly(phosphoribitol) ligase	LRHMDP2_2220	D-alanine--poly(phosphoribitol) ligase subunit 2	LRHMDP3_1703	D-alanine--poly(phosphoribitol) ligase subunit 2	LC705_00774	D-alanine--poly(phosphoribitol) ligase subunit 2	PEL5_1202	D-alanine--poly(phosphoribitol) ligase subunit 2	PEL6_226	D-alanine--poly(phosphoribitol) ligase subunit 2	R0011_10013	D-alanine--poly(phosphoribitol) ligase subunit 2
LGG_00780	extramembranal protein DltD	HMPREF0541_02339	DltD central region	LRHK_779	D-alanyl-lipoteichoic acid biosynthesis protein DltD	LRHM_0757	D-alanyl transfer protein DltD	E800_1269	Poly(glycerophosphate chain) D-alanine transfer protein DltD	LRH_00322	D-alanyl transfer protein	HMPREF0539_3068	D-alanine transfer protein DltD	LRHMDP2_2221	Poly(glycerophosphate chain) D-alanine transfer protein DltD	LRHMDP3_1702	Poly(glycerophosphate chain) D-alanine transfer protein DltD	LC705_00775	extramembranal protein DltD	PEL5_1203	Poly(glycerophosphate chain) D-alanine transfer protein DltD	PEL6_225	Poly(glycerophosphate chain) D-alanine transfer protein DltD	R0011_10018	extramembranal protein DltD
LGG_00781	hydrocarbon binding protein	HMPREF0541_02340	hypothetical protein	LRHK_780	hypothetical protein	LRHM_0758	hypothetical protein	E800_1270	FIG008111: hypothetical protein	LRH_00327	Predicted hydrocarbon binding protein, V4R domain	HMPREF0539_3069	possible yslB protein	LRHMDP2_2222	FIG008111: hypothetical protein	LRHMDP3_1701	FIG008111: hypothetical protein	LC705_00776	hydrocarbon binding protein	PEL5_1204	FIG008111: hypothetical protein	PEL6_224	FIG008111: hypothetical protein	R0011_10023	hydrocarbon binding protein
LGG_00782	glutamate racemase	HMPREF0541_02341	glutamate racemase	LRHK_782	non-canonical purine NTP pyrophosphatase, RdgB/HAM1 family	LRHM_0759	glutamate racemase	E800_1271	Glutamate racemase / Nucleoside 5-triphosphatase RdgB (dHAPTP, dITP, XTP-specific)	LRH_00332	Glutamate racemase with xanthosine/inosine pyrophosphatase of HAM1 family protein	HMPREF0539_3070	glutamate racemase with xanthosine/inosine pyrophosphatase of HAM1 family protein	LRHMDP2_2223	Glutamate racemase / Nucleoside 5-triphosphatase RdgB (dHAPTP, dITP, XTP-specific)	LRHMDP3_1700	Glutamate racemase / Nucleoside 5-triphosphatase RdgB (dHAPTP, dITP, XTP-specific)	LC705_00777	glutamate racemase	PEL5_1205	Glutamate racemase / Nucleoside 5-triphosphatase RdgB (dHAPTP, dITP, XTP-specific)	PEL6_223	Glutamate racemase / Nucleoside 5-triphosphatase RdgB (dHAPTP, dITP, XTP-specific)	R0011_10028	glutamate racemase
LGG_00783	phosphoesterase	HMPREF0541_02342	phosphodiesterase family protein	LRHK_783	phosphodiesterase	LRHM_0760	putative phosphoesterase	E800_1272	FIG009886: phosphoesterase	LRH_00337	Predicted phosphoesterase	HMPREF0539_3071	phosphoesterase	LRHMDP2_2224	FIG009886: phosphoesterase	LRHMDP3_1699	FIG009886: phosphoesterase	LC705_00778	phosphoesterase	PEL5_1206	FIG009886: phosphoesterase	PEL6_222	FIG009886: phosphoesterase	R0011_10033	phosphoesterase
LGG_00784	glycerol uptake facilitator protein	HMPREF0541_02343	channel protein, MIP family			LRHM_0761	glycerol uptake facilitator protein	E800_1273	Glycerol uptake facilitator protein	LRH_00342	Glycerol uptake facilitator related permease (Major Intrinsic Protein Family)	HMPREF0539_3072	glycerol MIP family major intrinsic protein channel protein	LRHMDP2_2225	Glycerol uptake facilitator protein	LRHMDP3_1698	Glycerol uptake facilitator protein	LC705_00779	glycerol uptake facilitator protein	PEL5_1207	Glycerol uptake facilitator protein	PEL6_221	Glycerol uptake facilitator protein	R0011_10038	glycerol uptake facilitator protein
LGG_00785	CBS domain-containing protein	HMPREF0541_02344	CBS domain protein	LRHK_786	CBS domain-containing protein ykuL	LRHM_0762	hypothetical protein	E800_1274	FIG042801: CBS domain containing protein	LRH_00347	CBS domain containing protein	HMPREF0539_3073	cystathionine beta-synthase (CBS) domain protein	LRHMDP2_2226	FIG042801: CBS domain containing protein	LRHMDP3_1697	FIG042801: CBS domain containing protein	LC705_00780	CBS domain-containing protein	PEL5_1208	FIG042801: CBS domain containing protein	PEL6_220	FIG042801: CBS domain containing protein	R0011_10043	CBS domain-containing protein
LGG_00786	membrane protein	HMPREF0541_02345	hypothetical protein	LRHK_787	hypothetical protein	LRHM_0763	hypothetical protein	E800_1275	FIG028593: membrane protein	LRH_00357	Predicted membrane protein	HMPREF0539_3074	membrane protein	LRHMDP2_2227	FIG028593: membrane protein	LRHMDP3_1696	FIG028593: membrane protein	LC705_00781	membrane protein	PEL5_1209	FIG028593: membrane protein	PEL6_219	FIG028593: membrane protein	R0011_10048	membrane protein
LGG_00787	small-conductance mechanosensitive channel	HMPREF0541_02346	transporter, small conductance mechanosensitive ion channel MscS family protein	LRHK_788	mechanosensitive ion channel family protein	LRHM_0764	small-conductance mechanosensitive channel	E800_1276	Potassium efflux system KefA protein / Small-conductance mechanosensitive channel	LRH_00362	Small-conductance mechanosensitive channel	HMPREF0539_3075	MscS family small conductance mechanosenstive ion channel protein	LRHMDP2_2228	Potassium efflux system KefA protein / Small-conductance mechanosensitive channel	LRHMDP3_1695	Potassium efflux system KefA protein / Small-conductance mechanosensitive channel	LC705_00782	small-conductance mechanosensitive channel	PEL5_1210	Potassium efflux system KefA protein / Small-conductance mechanosensitive channel	PEL6_218	Potassium efflux system KefA protein / Small-conductance mechanosensitive channel	R0011_10053	small-conductance mechanosensitive channel
LGG_00788	hypothetical protein			LRHK_2724	hypothetical protein	LRHM_0765	hypothetical protein					HMPREF0539_0698	conserved hypothetical protein							PEL5_1211	Malolactic regulator	PEL6_217	Malolactic regulator
LGG_00789	methyl-accepting chemotaxis-like protein	HMPREF0541_02348	hypothetical protein	LRHK_790	hypothetical protein	LRHM_0766	chemotaxis protein	E800_1277	General stress protein	LRH_00372	Methyl-accepting chemotaxis-like protein	HMPREF0539_3076	methyl-accepting chemotaxis family protein	LRHMDP2_2230	General stress protein	LRHMDP3_1692	General stress protein	LC705_00783	methyl-accepting chemotaxis-like protein	PEL5_1212	General stress protein	PEL6_216	General stress protein	R0011_10058	methyl-accepting chemotaxis-like protein
LGG_00790	hypothetical protein	HMPREF0541_02349	hypothetical protein	LRHK_791	ytxH-like family protein	LRHM_0767	hypothetical protein	E800_1278	FIG00743537: hypothetical protein	LRH_00377	hypothetical protein	HMPREF0539_3077	conserved hypothetical protein	LRHMDP2_2231	FIG00743537: hypothetical protein	LRHMDP3_1691	FIG00743537: hypothetical protein	LC705_00784	hypothetical protein	PEL5_1213	FIG00743537: hypothetical protein	PEL6_215	FIG00743537: hypothetical protein	R0011_10063	hypothetical protein
LGG_00791	transcriptional regulator	HMPREF0541_02350	3H domain protein	LRHK_792	HTH domain protein	LRHM_0768	hypothetical protein	E800_1279	Transcriptional repressor for NAD biosynthesis in gram-positives	LRH_00382	Small molecule binding protein, 3H domain	HMPREF0539_3078	transcriptional regulator	LRHMDP2_2232	Transcriptional repressor for NAD biosynthesis in gram-positives	LRHMDP3_1690	Transcriptional repressor for NAD biosynthesis in gram-positives	LC705_00785	transcriptional regulator	PEL5_1214	Transcriptional repressor for NAD biosynthesis in gram-positives	PEL6_214	Transcriptional repressor for NAD biosynthesis in gram-positives	R0011_10068	transcriptional regulator
LGG_00792	Xaa-Pro dipeptidase	HMPREF0541_02351	Xaa-Pro dipeptidase	LRHK_793	xaa-Pro dipeptidase	LRHM_0769	proline dipeptidase	E800_1280	Proline dipeptidase	LRH_00387	proline dipeptidase	HMPREF0539_3079	Xaa-Pro dipeptidase	LRHMDP2_2233	Proline dipeptidase	LRHMDP3_1689	Proline dipeptidase	LC705_00786	Xaa-Pro dipeptidase	PEL5_1215	Proline dipeptidase	PEL6_182	Proline dipeptidase	R0011_10073	Xaa-Pro dipeptidase
LGG_00793	catabolite control protein A	HMPREF0541_02352	catabolite control protein A	LRHK_794	catabolite control protein A	LRHM_0770	catabolite control protein A	E800_1281	Catabolite control protein A	LRH_00392	catabolite control protein A	HMPREF0539_3080	catabolite control protein A	LRHMDP2_2234	Catabolite control protein A	LRHMDP3_1688	Catabolite control protein A	LC705_00787	catabolite control protein A	PEL5_1216	Catabolite control protein A	PEL6_181	Catabolite control protein A	R0011_10078	catabolite control protein A
LGG_00794	penicillin-binding protein 1B	HMPREF0541_02353	transglycosylase	LRHK_795	transglycosylase	LRHM_0771	penicillin-binding protein 1B			LRH_00397	Membrane carboxypeptidase (penicillin-binding protein)	HMPREF0539_3081	penicillin-binding protein 1b					LC705_00788	membrane carboxypeptidase					R0011_10083	membrane carboxypeptidase
LGG_00795	hypothetical protein	HMPREF0541_00645	hypothetical protein	LRHK_796	hypothetical protein			E800_1283	hypothetical protein
LGG_00796	haloacid dehalogenase-like family hydrolase	HMPREF0541_02355	HAD hydrolase family	LRHK_797	putative HAD-hydrolase yfnB	LRHM_0772	hydrolase	E800_1284	5'-nucleotidase YjjG	LRH_00402	Predicted hydrolase (HAD superfamily) protein	HMPREF0539_3082	possible 5'-nucleotidase	LRHMDP2_2237	5'-nucleotidase YjjG	LRHMDP3_1685	5'-nucleotidase YjjG	LC705_00789	haloacid dehalogenase-like family hydrolase	PEL5_1218	5'-nucleotidase YjjG	PEL6_179	5'-nucleotidase YjjG	R0011_10088	haloacid dehalogenase-like family hydrolase
LGG_00797	biotin operon repressor	HMPREF0541_02356	biotin--[acetyl-CoA-carboxylase] ligase	LRHK_798	biotin--[acetyl-CoA-carboxylase] ligase	LRHM_0773	biotin operon repressor	E800_1285	Biotin-protein ligase / Biotin operon repressor	LRH_00407	Biotin operon repressor	HMPREF0539_3083	biotin operon repressor	LRHMDP2_2238	Biotin-protein ligase / Biotin operon repressor	LRHMDP3_1684	Biotin-protein ligase / Biotin operon repressor	LC705_00790	biotin operon repressor	PEL5_1219	Biotin-protein ligase / Biotin operon repressor	PEL6_178	Biotin-protein ligase / Biotin operon repressor	R0011_10093	biotin operon repressor
LGG_00798	dipeptidase PepV	HMPREF0541_02357	dipeptidase PepV	LRHK_799	dipeptidase family protein	LRHM_0774	dipeptidase PepV	E800_1286	Acetylornithine deacetylase/Succinyl-diaminopimelate desuccinylase and related deacylases	LRH_00412	dipeptidase PepV	HMPREF0539_3084	M20 family peptidase PepV	LRHMDP2_2239	Acetylornithine deacetylase/Succinyl-diaminopimelate desuccinylase and related deacylases	LRHMDP3_1683	Acetylornithine deacetylase/Succinyl-diaminopimelate desuccinylase and related deacylases	LC705_00791	dipeptidase PepV	PEL5_1220	Acetylornithine deacetylase/Succinyl-diaminopimelate desuccinylase and related deacylases	PEL6_177	Acetylornithine deacetylase/Succinyl-diaminopimelate desuccinylase and related deacylases	R0011_10098	dipeptidase PepV
LGG_00799	glycerophosphoryl diester phosphodiesterase	HMPREF0541_02358	glycerophosphodiester phosphodiesterase family protein	LRHK_800	glycerophosphoryl diester phosphodiesterase family protein	LRHM_0775	glycerophosphoryl diester phosphodiesterase	E800_1287	Glycerophosphoryl diester phosphodiesterase	LRH_00417	Glycerophosphoryl diester phosphodiesterase	HMPREF0539_3085	glycerophosphoryl diester phosphodiesterase	LRHMDP2_2240	Glycerophosphoryl diester phosphodiesterase	LRHMDP3_1682	Glycerophosphoryl diester phosphodiesterase	LC705_00792	glycerophosphoryl diester phosphodiesterase	PEL5_1221	Glycerophosphoryl diester phosphodiesterase	PEL6_176	Glycerophosphoryl diester phosphodiesterase	R0011_10103	glycerophosphoryl diester phosphodiesterase
LGG_00800	hypothetical protein	HMPREF0541_02359	hypothetical protein	LRHK_801	hypothetical protein	LRHM_0776	hypothetical protein	E800_1288	FIG00742710: hypothetical protein	LRH_00422	hypothetical protein	HMPREF0539_3086	conserved hypothetical protein	LRHMDP2_2241	FIG00742710: hypothetical protein	LRHMDP3_1681	FIG00742710: hypothetical protein	LC705_00793	hypothetical protein	PEL5_1222	FIG00742710: hypothetical protein	PEL6_175	FIG00742710: hypothetical protein	R0011_10108	hypothetical protein
LGG_00801	membrane protein	HMPREF0541_02361	YibE/F-like protein	LRHK_802	yibE/F-like family protein	LRHM_0777	hypothetical protein	E800_1289	Transporter	LRH_00427	Predicted multitransmembrane protein	HMPREF0539_3087	possible multitransmembrane protein	LRHMDP2_2242	Transporter	LRHMDP3_1680	Transporter	LC705_00794	membrane protein	PEL5_1223	Transporter	PEL6_174	Transporter	R0011_10113	membrane protein
LGG_00802	membrane protein	HMPREF0541_02362	YibE/F-like protein	LRHK_803	yibE/F-like family protein	LRHM_0778	hypothetical protein	E800_1290	Predicted multitransmembrane protein	LRH_00432	Predicted multitransmembrane protein	HMPREF0539_3088	possible multitransmembrane protein	LRHMDP2_2243	Predicted multitransmembrane protein	LRHMDP3_1679	Predicted multitransmembrane protein	LC705_00795	membrane protein	PEL5_1224	Predicted multitransmembrane protein	PEL6_173	Predicted multitransmembrane protein	R0011_10118	membrane protein
LGG_00803	phosphoesterase-like protein	HMPREF0541_02363	hypothetical protein	LRHK_804	calcineurin-like phosphoesterase family protein	LRHM_0779	putative phosphoesterase	E800_1291	Phosphoesterase	LRH_00437	Predicted phosphoesterase or phosphohydrolase	HMPREF0539_3089	phosphoesterase	LRHMDP2_2244	Phosphoesterase	LRHMDP3_1678	Phosphoesterase	LC705_00796	phosphoesterase-like protein	PEL5_1225	Phosphoesterase	PEL6_172	Phosphoesterase	R0011_10123	phosphoesterase-like protein
LGG_00804	5'-nucleotidase/2',3'-cyclic phosphodiesterase-like esterase	HMPREF0541_02364	Ser/Thr phosphatase family protein	LRHK_805	5'-nucleotidase	LRHM_0780	putative nucleotide phosphoesterase	E800_1292	5'-nucleotidase family protein in cluster with NagD-like phosphatase	LRH_00442	5'-nucleotidase/2',3'-cyclic phosphodiesterase related esterase	HMPREF0539_3090	probable 5'-nucleotidase	LRHMDP2_2245	5'-nucleotidase family protein in cluster with NagD-like phosphatase	LRHMDP3_1677	5'-nucleotidase family protein in cluster with NagD-like phosphatase	LC705_00797	5'-nucleotidase/2',3'-cyclic phosphodiesterase-like esterase	PEL5_1226	5'-nucleotidase family protein in cluster with NagD-like phosphatase	PEL6_171	5'-nucleotidase family protein in cluster with NagD-like phosphatase	R0011_10128	5'-nucleotidase/2',3'-cyclic phosphodiesterase-like esterase
LGG_00805	transcriptional regulator	HMPREF0541_02365	hypothetical protein	LRHK_806	hypothetical protein	LRHM_0781	hypothetical protein	E800_1293	Hypothetical DUF1027 domain protein	LRH_00447	hypothetical protein	HMPREF0539_3091	protein of hypothetical function DUF1027	LRHMDP2_2246	Hypothetical DUF1027 domain protein	LRHMDP3_1676	Hypothetical DUF1027 domain protein	LC705_00798	transcriptional regulator	PEL5_1227	Hypothetical DUF1027 domain protein	PEL6_170	Hypothetical DUF1027 domain protein	R0011_10133	transcriptional regulator
LGG_00806	hydrolase of the HAD superfamily	HMPREF0541_02366	HAD hydrolase family	LRHK_807	hydrolase, haloacid dehalogenase family	LRHM_0782	putative sugar phosphatase	E800_1294	Hypothetical NagD-like phosphatase	LRH_00452	Predicted sugar phosphatase of the HAD superfamily protein	HMPREF0539_3092	HAD family haloacid dehalogenase hydrolase	LRHMDP2_2247	Hypothetical NagD-like phosphatase	LRHMDP3_1675	Hypothetical NagD-like phosphatase	LC705_00799	HAD superfamily hydrolase	PEL5_1228	Hypothetical NagD-like phosphatase	PEL6_169	Hypothetical NagD-like phosphatase	R0011_10138	HAD superfamily hydrolase
LGG_00807	rhodopsin-like GPCR superfamily membrane protein	HMPREF0541_02367	TIGR01906 family protein	LRHK_808	hypothetical protein	LRHM_0783	hypothetical protein	E800_1295	COG4478, integral membrane protein	LRH_00457	Predicted membrane protein	HMPREF0539_3093	membrane protein	LRHMDP2_2248	COG4478, integral membrane protein	LRHMDP3_1674	COG4478, integral membrane protein	LC705_00800	integral membrane protein, Rhodopsin-like GPCR superfamily	PEL5_1229	COG4478, integral membrane protein	PEL6_168	COG4478, integral membrane protein	R0011_10143	rhodopsin-like GPCR superfamily membrane protein
[truncated: 4,107 more rows]
